# Supplementary material
Source: Research Square preprint supplement (doi:10.21203/rs.3.rs-9539203/v1)
Supplement: Supplementary file 1 [file e0481616c2301b2a0b90a41b.xlsx]

## Sheet: Table S1
Id	Genome_ID	Genus	Specie	Subspecie	NCBI_Taxon_ID	Strain	Contigs	Publication	BioProject_Accession	BioSample_Accession	Assembly_Accession	GenBank_Accessions	Isolation_Source	Genome_Status	Sequencing_Platform	Genome_Length	GC_Content	PATRIC_CDS	RefSeq_CDS	Checkm_Completeness	BUSCO_completeness	Genome_Quality	Host_Name	Completion_Date	Date_Inserted	Date_Modified	n_genes_called.GUNC	n_genes_mapped.GUNC	taxonomic_level.GUNC	proportion_genes_retained_in_major_clades.GUNC	genes_retained_index.GUNC	clade_separation_score.GUNC	contamination_portion.GUNC	n_effective_surplus_clades.GUNC	mean_hit_identity.GUNC	reference_representation_score.GUNC	Contamination_Filter	Wrong_Annotation_Filter	Minority_Group_Filter	Global_Filter	Preprocessing_reassignation
1	1036735.3	Bifidobacterium	breve	NA	1036735	CECT 7263	34	22740680	PRJNA67403	SAMN02471362	GCA_000247755.2	AFVV00000000	Milk	WGS	Unknown	2314396	58.9	1954	1725	99.7	0.944	Good	Human, Homo sapiens	2012-02-16	2014-12-08 22:10:28	2015-03-16 03:17:09	1951	1908	kingdom	1	0.98	0	0	0	0.94	0.92	Not_Removed	Not_Removed	Not_Removed	Not_Removed
2	1074482.3	Bifidobacterium	breve	NA	1074482	DPC 6330	47	22072651	PRJNA71589	SAMN02471030	GCA_000226175.2	AFXX00000000	Elderly feces	WGS	Unknown	2386233	58.6	2070	NA	100	0.952	Good	Human, Homo sapiens	2011-09-19	2014-12-08 22:10:28	2015-03-16 03:17:09	2106	2042	phylum	1	0.97	0.25	0.02	0.04	0.93	0.9	Not_Removed	Not_Removed	Not_Removed	Not_Removed
3	1150460.3	Bifidobacterium	kashiwanohense	NA	1150460	DSM 21854	30	25085493	PRJNA239848	SAMN02673436	GCA_000741605.1	JGYY00000000	Infant feces	WGS	Ion Torrent	2307960	56.2	2029	1948	100	0.911	Good	Human, Homo sapiens	2014-08-18	2014-12-08 22:31:36	2015-03-16 03:17:09	1990	1925	kingdom	1	0.97	0	0	0	0.93	0.9	Not_Removed	Not_Removed	Not_Removed	Not_Removed
4	1150461.4	Bifidobacterium	scardovii	NA	1150461	DSM 13734	57	NA	PRJNA279230	SAMN03443793	GCF_001005065.1	LBIB00000000	Blood	WGS	Illumina	3143954	64.64	2735	NA	100	0.952	Good	Human, Homo sapiens	2015-05-07	2016-01-17 16:01:49	2016-01-17 16:01:49	2589	2549	kingdom	1	0.98	0	0	0	0.98	0.97	Not_Removed	Removed	Not_Removed	Removed
5	1168290.3	Bifidobacterium	animalis	subsp. lactis	1168290	B420	1	NA	PRJNA156973	SAMN02603214	GCA_000277325.1	CP003497.1	NA	Complete	Unknown	1938595	60.5	1604	1561	100	0.96	Good	Human, Homo sapiens	2012-05-07	2014-12-08 22:10:27	2015-03-16 03:17:09	1577	1542	kingdom	1	0.98	0	0	0	0.98	0.96	Not_Removed	Not_Removed	Not_Removed	Not_Removed
6	1203540.3	Bifidobacterium	breve	NA	1203540	HPH0326	6	NA	PRJNA169434	SAMN02596976	GCA_000411435.1	ATCB00000000	Intestine	WGS	Illumina	2502557	59.1	2182	2137	100	0.952	Good	Human, Homo sapiens	2013-06-14	2014-12-08 22:10:28	2015-03-16 03:17:09	2163	2113	kingdom	1	0.98	0	0	0	0.94	0.92	Not_Removed	Not_Removed	Not_Removed	Not_Removed
7	1207542.8	Bifidobacterium	bifidum	NA	1207542	LMG 13195	34	25523018	PRJNA263318	SAMN03103720	GCF_001020415.1	JSEA00000000	Intestine	WGS	Ion Torrent	2310178	62.55	2069	1835	100	0.96	Good	Human, Homo sapiens	2015-06-05	2016-01-17 16:05:18	2016-01-17 16:05:18	1972	1884	kingdom	1	0.96	0	0	0	0.94	0.9	Not_Removed	Not_Removed	Not_Removed	Not_Removed
8	1207542.9	Bifidobacterium	bifidum	NA	1207542	JCM 7004	1	28814130	PRJDB5664	SAMD00078038	GCA_003573955.1	AP018131	Intestine	Complete	PacBio	2261666	62.6342	2098	2106	100	0.927	Good	Human, Homo sapiens	2017-09-15	2018-10-03 15:37:06	2018-10-03 15:37:06	2002	1910	kingdom	1	0.95	0	0	0	0.94	0.9	Not_Removed	Not_Removed	Not_Removed	Not_Removed
9	1207543.3	Bifidobacterium	bifidum	NA	1207543	IPLA 20015	571	NA	PRJNA170147	SAMN02470078	GCA_000300215.1	AMPM00000000	Infant feces	WGS	Illumina	2138334	62.7	1820	2159	92.3	0.782	Good	Human, Homo sapiens	2012-09-28	2014-12-08 22:10:27	2015-03-16 03:17:09	2217	2120	kingdom	1	0.96	0	0	0	0.96	0.91	Not_Removed	Not_Removed	Not_Removed	Not_Removed
10	1254439.12	Bifidobacterium	thermophilum	NA	1254439	RBL67	1	NA	PRJNA179141	SAMN02603226	GCA_000347695.1	CP004346.1	Infant feces	Complete	Roche 454|Illumina|Sanger	2291643	60.1	1839	1845	100	0.952	Good	Human, Homo sapiens	2013-03-20	2014-12-08 22:10:29	2015-03-16 03:17:09	1710	1631	kingdom	1	0.95	0	0	0	0.84	0.8	Not_Removed	Removed	Not_Removed	Removed
11	1261072.3	Bifidobacterium	breve	NA	1261072	JCP7499	96	NA	PRJNA181327	SAMN02436887	GCA_000466545.1	AWSX00000000	Vagina	WGS	Illumina	2366917	58.6	2073	2281	100	0.927	Good	Human, Homo sapiens	2013-09-12	2014-12-08 22:10:28	2015-03-16 03:17:09	2105	2022	kingdom	1	0.96	0	0	0	0.93	0.89	Not_Removed	Not_Removed	Not_Removed	Not_Removed
12	1263057.3	Bifidobacterium	adolescentis	NA	1263057	MGS:119	124	NA	PRJEB698	SAMEA3138648	GCF_000435235.1	CAXT000000000	Feces	WGS	Unknown	1924354	59.4	1734	1593	97.6	0.815	Good	Human, Homo sapiens	2013-05-31	2016-01-17 15:32:21	2016-01-17 15:32:21	1671	1614	kingdom	1	0.97	0	0	0	0.95	0.92	Not_Removed	Not_Removed	Not_Removed	Not_Removed
13	1263058.3	Bifidobacterium	bifidum	NA	1263058	MGS:234	107	NA	PRJEB773	SAMEA3138682	GCF_000435915.1	CBDF000000000	Feces	WGS	Unknown	2124139	62.59	1903	1784	99.6	0.871	Good	Human, Homo sapiens	2013-05-31	2016-01-17 15:32:34	2016-01-17 15:32:34	1832	1771	kingdom	1	0.97	0	0	0	0.95	0.92	Not_Removed	Not_Removed	Not_Removed	Not_Removed
14	1263059.3	Bifidobacterium	longum	NA	1263059	MGS:69	117	NA	PRJEB979	SAMEA3138475	GCF_000431755.1	CAZE000000000	Feces	WGS	Unknown	2035113	60.04	1829	1686	98.7	0.911	Good	Human, Homo sapiens	2013-05-31	2016-01-17 15:31:17	2016-01-17 15:31:17	1771	1737	kingdom	1	0.98	0	0	0	0.95	0.94	Not_Removed	Not_Removed	Not_Removed	Not_Removed	B. longum subsp. longum
15	1263060.3	Bifidobacterium	pseudocatenulatum	NA	1263060	MGS:263	123	NA	PRJEB795	SAMEA3138725	GCF_000436815.1	CBEV000000000	Feces	WGS	Unknown	2009589	56.38	1805	1659	97.4	0.75	Good	Human, Homo sapiens	2013-05-31	2016-01-17 15:32:49	2016-01-17 15:32:49	1717	1673	kingdom	1	0.97	0	0	0	0.97	0.95	Not_Removed	Not_Removed	Not_Removed	Not_Removed
16	1266716.3	Bifidobacterium	longum	subsp. longum	1266716	CMCC P0001	135	NA	PRJNA182967	SAMN02470970	GCA_000410595.1	APVE00000000	Infant feces	WGS	Illumina	2422681	59.7	2037	NA	100	0.952	Good	Human, Homo sapiens	2013-06-04	2014-12-08 22:10:28	2015-03-16 03:17:09	2077	1995	kingdom	1	0.96	0	0	0	0.92	0.88	Not_Removed	Not_Removed	Not_Removed	Not_Removed
17	1322347.4	Bifidobacterium	longum	NA	1322347	E18	1	NA	PRJNA197134	SAMN02471972	GCF_000497735.1	AUYD00000000	Adult feces	Complete	Roche 454|Sanger	2372966	59.96	2084	1862	100	0.935	Good	Human, Homo sapiens	2015-03-23	2016-01-17 15:33:52	2016-01-17 15:33:52	2028	1930	kingdom	1	0.95	0	0	0	0.92	0.87	Not_Removed	Not_Removed	Not_Removed	Not_Removed	B. longum subsp. longum
18	1350471.3	Bifidobacterium	longum	subsp. longum	1350471	1-5B	25	NA	PRJNA209580	SAMN02862991	GCA_000730105.1	JNVX00000000	Feces	WGS	Illumina	2367512	60.1	1978	1855	100	0.944	Good	Human, Homo sapiens	2014-07-16	2014-12-09 00:45:34	2015-03-16 03:17:09	1985	1904	kingdom	1	0.96	0	0	0	0.93	0.89	Not_Removed	Not_Removed	Not_Removed	Not_Removed
19	1350472.3	Bifidobacterium	longum	subsp. longum	1350472	7-1B	34	NA	PRJNA209581	SAMN02862992	GCA_000730055.1	JNVY00000000	Feces	WGS	Illumina	2407087	59.8	1988	1879	100	0.944	Good	Human, Homo sapiens	2014-07-16	2014-12-09 00:45:34	2015-03-16 03:17:09	2000	1922	kingdom	1	0.96	0	0	0	0.93	0.89	Not_Removed	Not_Removed	Not_Removed	Not_Removed
20	1350473.3	Bifidobacterium	longum	subsp. longum	1350473	17-1B	20	NA	PRJNA209583	SAMN02862993	GCA_000730035.1	JNVZ00000000	Feces	WGS	Illumina	2467200	60.2	2103	1912	100	0.944	Good	Human, Homo sapiens	2014-07-16	2014-12-09 00:45:35	2015-03-16 03:17:09	2083	1993	kingdom	1	0.96	0	0	0	0.92	0.88	Not_Removed	Not_Removed	Not_Removed	Not_Removed
21	1351.2056	Enterococcus	faecalis	NA	1351	J107	32	NA	PRJDB8215	SAMD00169686	GCA_007034685.1	BJTH00000000	Feces	WGS	Illumina	2928338	37.5066	2864	2793	NA	0.984	Good	Human, Homo sapiens	2019-07-09	2019-09-30 19:54:54	2019-09-30 19:54:54	2851	2771	kingdom	1	0.97	0	0	0	0.95	0.92	Not_Removed	Removed	Not_Removed	Removed
22	1351.2057	Enterococcus	faecalis	NA	1351	J137	31	NA	PRJDB8215	SAMD00169687	GCA_007034765.1	BJTI00000000	Feces	WGS	Illumina	2850529	37.3467	2769	2690	NA	0.984	Good	Human, Homo sapiens	2019-07-09	2019-09-30 19:55:06	2019-09-30 19:55:06	2764	2669	kingdom	1	0.97	0	0	0	0.96	0.93	Not_Removed	Removed	Not_Removed	Removed
23	1351.2058	Enterococcus	faecalis	NA	1351	J138	32	NA	PRJDB8215	SAMD00169688	GCA_007034845.1	BJTJ00000000	Feces	WGS	Illumina	2930781	37.5133	2868	2794	NA	0.984	Good	Human, Homo sapiens	2019-07-09	2019-09-30 19:55:11	2019-09-30 19:55:11	2851	2771	kingdom	1	0.97	0	0	0	0.95	0.92	Not_Removed	Removed	Not_Removed	Removed
24	1351.2059	Enterococcus	faecalis	NA	1351	J147	29	NA	PRJDB8215	SAMD00169689	GCA_007034965.1	BJTK00000000	Feces	WGS	Illumina	2794898	37.3958	2695	2629	NA	0.984	Good	Human, Homo sapiens	2019-07-09	2019-09-30 19:55:47	2019-09-30 19:55:47	2690	2600	kingdom	1	0.97	0	0	0	0.96	0.93	Not_Removed	Removed	Not_Removed	Removed
25	1351.206	Enterococcus	faecalis	NA	1351	J158	29	NA	PRJDB8215	SAMD00169690	GCA_007035085.1	BJTL00000000	Feces	WGS	Illumina	2871953	37.4882	2790	2716	NA	0.984	Good	Human, Homo sapiens	2019-07-09	2019-09-30 19:56:34	2019-09-30 19:56:34	2770	2694	kingdom	1	0.97	0	0	0	0.96	0.93	Not_Removed	Removed	Not_Removed	Removed
26	1351.2061	Enterococcus	faecalis	NA	1351	J159	13	NA	PRJDB8215	SAMD00169691	GCA_007035185.1	BJTM00000000	Feces	WGS	Illumina	2873694	37.4898	2782	2723	NA	0.984	Good	Human, Homo sapiens	2019-07-09	2019-09-30 19:58:07	2019-09-30 19:58:07	2767	2692	kingdom	1	0.97	0	0	0	0.96	0.93	Not_Removed	Removed	Not_Removed	Removed
27	1351.2062	Enterococcus	faecalis	NA	1351	J188	22	NA	PRJDB8215	SAMD00169692	GCA_007035245.1	BJTN00000000	Feces	WGS	Illumina	2872519	37.49	2779	2719	NA	0.984	Good	Human, Homo sapiens	2019-07-09	2019-09-30 19:58:10	2019-09-30 19:58:10	2768	2691	kingdom	1	0.97	0	0	0	0.96	0.93	Not_Removed	Removed	Not_Removed	Removed
28	1351.2063	Enterococcus	faecalis	NA	1351	J190	17	NA	PRJDB8215	SAMD00169693	GCA_007035385.1	BJTO00000000	Feces	WGS	Illumina	2874611	37.49	2791	2721	NA	0.984	Good	Human, Homo sapiens	2019-07-09	2019-09-30 19:58:16	2019-09-30 19:58:16	2771	2694	kingdom	1	0.97	0	0	0	0.96	0.93	Not_Removed	Removed	Not_Removed	Removed
29	1351.2064	Enterococcus	faecalis	NA	1351	J207	18	NA	PRJDB8215	SAMD00169694	GCA_007035485.1	BJTP00000000	Feces	WGS	Illumina	2873047	37.4879	2783	2719	NA	0.984	Good	Human, Homo sapiens	2019-07-09	2019-09-30 19:58:14	2019-09-30 19:58:14	2773	2695	kingdom	1	0.97	0	0	0	0.96	0.93	Not_Removed	Removed	Not_Removed	Removed
30	1351.2065	Enterococcus	faecalis	NA	1351	J209	19	NA	PRJDB8215	SAMD00169695	GCA_007035545.1	BJTQ00000000	Feces	WGS	Illumina	2872883	37.49	2781	2715	NA	0.984	Good	Human, Homo sapiens	2019-07-09	2019-09-30 19:58:19	2019-09-30 19:58:19	2770	2691	kingdom	1	0.97	0	0	0	0.96	0.93	Not_Removed	Removed	Not_Removed	Removed
31	1351.2066	Enterococcus	faecalis	NA	1351	J245	27	NA	PRJDB8215	SAMD00169696	GCA_007035705.1	BJTR00000000	Feces	WGS	Illumina	2873489	37.4919	2784	2717	NA	0.984	Good	Human, Homo sapiens	2019-07-09	2019-09-30 19:59:23	2019-09-30 19:59:23	2775	2697	kingdom	1	0.97	0	0	0	0.96	0.93	Not_Removed	Removed	Not_Removed	Removed
32	1351.2067	Enterococcus	faecalis	NA	1351	J249	33	NA	PRJDB8215	SAMD00169697	GCA_007035845.1	BJTS00000000	Feces	WGS	Illumina	2928825	37.5051	2878	2793	NA	0.984	Good	Human, Homo sapiens	2019-07-09	2019-09-30 19:59:31	2019-09-30 19:59:31	2850	2772	kingdom	1	0.97	0	0	0	0.95	0.92	Not_Removed	Removed	Not_Removed	Removed
33	1351.2068	Enterococcus	faecalis	NA	1351	J302	25	NA	PRJDB8215	SAMD00169698	GCA_007035945.1	BJTT00000000	Feces	WGS	Illumina	2873406	37.4963	2784	2716	NA	0.984	Good	Human, Homo sapiens	2019-07-09	2019-09-30 19:59:33	2019-09-30 19:59:33	2774	2695	kingdom	1	0.97	0	0	0	0.96	0.93	Not_Removed	Removed	Not_Removed	Removed
34	1351.2069	Enterococcus	faecalis	NA	1351	J303	27	NA	PRJDB8215	SAMD00169699	GCA_007036085.1	BJTU00000000	Feces	WGS	Illumina	2874408	37.5017	2792	2718	NA	0.984	Good	Human, Homo sapiens	2019-07-09	2019-09-30 20:01:08	2019-09-30 20:01:08	2776	2695	kingdom	1	0.97	0	0	0	0.96	0.93	Not_Removed	Removed	Not_Removed	Removed
35	1365960.3	Bifidobacterium	breve	NA	1365960	MCC 0121	27	26236711	PRJNA215976	SAMN03978796	GCF_001264045.1	AVQA00000000	Infant feces	WGS	Illumina	2436344	58.92	2205	2079	100	0.952	Good	Human, Homo sapiens	2015-08-11	2016-01-17 17:01:47	2016-01-17 17:01:47	2117	2055	kingdom	1	0.97	0	0	0	0.94	0.91	Not_Removed	Not_Removed	Not_Removed	Not_Removed
36	1365961.3	Bifidobacterium	breve	NA	1365961	MCC 0305	22	26236711	PRJNA215975	SAMN03978801	GCF_001264035.1	AWFR00000000	Feces	WGS	Illumina	2286838	58.85	2042	1927	100	0.952	Good	Human, Homo sapiens	2015-08-11	2016-01-17 17:01:47	2016-01-17 17:01:47	1968	1910	kingdom	1	0.97	0	0	0	0.94	0.91	Not_Removed	Not_Removed	Not_Removed	Not_Removed
37	1365962.3	Bifidobacterium	breve	NA	1365962	MCC 0476	15	26236711	PRJNA215979	SAMN03978797	GCF_001263845.1	AVQB00000000	Adult feces	WGS	Illumina	2233807	58.65	1973	1851	100	0.952	Good	Human, Homo sapiens	2015-08-11	2016-01-17 17:01:43	2016-01-17 17:01:43	1883	1842	kingdom	1	0.98	0	0	0	0.95	0.93	Not_Removed	Not_Removed	Not_Removed	Not_Removed
38	1365963.3	Bifidobacterium	breve	NA	1365963	MCC 1094	23	26236711	PRJNA215978	SAMN03978802	GCF_001264095.1	AWFS00000000	Infant feces	WGS	Illumina	2327206	58.95	2074	1944	100	0.952	Good	Human, Homo sapiens	2015-08-11	2016-01-17 17:01:48	2016-01-17 17:01:48	2012	1965	kingdom	1	0.98	0	0	0	0.94	0.92	Not_Removed	Not_Removed	Not_Removed	Not_Removed
39	1365964.3	Bifidobacterium	breve	NA	1365964	MCC 1114	33	26236711	PRJNA215977	SAMN03978798	GCF_001263855.1	AVQC00000000	Infant feces	WGS	Illumina	2487280	58.95	2282	2136	100	0.952	Good	Human, Homo sapiens	2015-08-11	2016-01-17 17:01:44	2016-01-17 17:01:44	2197	2107	kingdom	1	0.96	0	0	0	0.93	0.9	Not_Removed	Not_Removed	Not_Removed	Not_Removed
40	1365965.3	Bifidobacterium	breve	NA	1365965	MCC 1128	25	26236711	PRJNA215982	SAMN03978799	GCF_001263915.1	AVQD00000000	Infant feces	WGS	Illumina	2480222	58.91	2280	2143	100	0.952	Good	Human, Homo sapiens	2015-08-11	2016-01-17 17:01:44	2016-01-17 17:01:44	2187	2073	kingdom	1	0.95	0	0	0	0.93	0.88	Not_Removed	Not_Removed	Not_Removed	Not_Removed
41	1365966.3	Bifidobacterium	breve	NA	1365966	MCC 1340	23	26236711	PRJNA215981	SAMN03978803	GCF_001264105.1	AWFT00000000	Infant feces	WGS	Illumina	2373106	58.59	2103	1986	100	0.952	Good	Human, Homo sapiens	2015-08-11	2016-01-17 17:01:48	2016-01-17 17:01:48	2024	1964	kingdom	1	0.97	0	0	0	0.94	0.91	Not_Removed	Not_Removed	Not_Removed	Not_Removed
42	1365967.3	Bifidobacterium	breve	NA	1365967	MCC 1454	14	26236711	PRJNA215980	SAMN03978804	GCF_001264135.1	AWFU00000000	Infant feces	WGS	Illumina	2457448	58.53	2238	2111	100	0.952	Good	Human, Homo sapiens	2015-08-11	2016-01-17 17:01:49	2016-01-17 17:01:49	2151	1975	kingdom	1	0.92	0	0	0	0.93	0.85	Not_Removed	Not_Removed	Not_Removed	Not_Removed
43	1365968.3	Bifidobacterium	breve	NA	1365968	MCC 1604	15	26236711	PRJNA215984	SAMN03978800	GCF_001264155.1	AVQE00000000	Elderly feces	WGS	Illumina	2206390	58.7	1932	1830	100	0.952	Good	Human, Homo sapiens	2015-08-11	2016-01-17 17:01:49	2016-01-17 17:01:49	1852	1814	kingdom	1	0.98	0	0	0	0.95	0.93	Not_Removed	Not_Removed	Not_Removed	Not_Removed
44	1365969.3	Bifidobacterium	breve	NA	1365969	MCC 1605	37	26236711	PRJNA215983	SAMN03978805	GCF_001263935.1	AWFV00000000	Feces	WGS	Illumina	2324012	58.98	2102	1976	100	0.952	Good	Human, Homo sapiens	2015-08-11	2016-01-17 17:01:45	2016-01-17 17:01:45	2029	1959	kingdom	1	0.97	0	0	0	0.94	0.91	Not_Removed	Not_Removed	Not_Removed	Not_Removed
45	1385938.3	Bifidobacterium	breve	NA	1385938	12L	1	NA	PRJNA214949	SAMN03081478	GCA_000568955.1	CP006711.1	Milk	Complete	Roche 454	2244624	58.9	1907	1765	100	0.952	Good	Human, Homo sapiens	2014-02-14	2014-12-08 22:10:28	2015-03-16 03:17:09	1875	1830	kingdom	1	0.98	0	0	0	0.95	0.92	Not_Removed	Not_Removed	Not_Removed	Not_Removed
46	1385939.3	Bifidobacterium	breve	NA	1385939	JCM 7017	1	NA	PRJNA214950	SAMN03081479	GCA_000568975.1	CP006712.1	Infant feces	Complete	Roche 454|Illumina	2288919	58.7	1944	1770	100	0.952	Good	Human, Homo sapiens	2014-02-14	2014-12-08 22:10:28	2015-03-16 03:17:09	1915	1866	kingdom	1	0.97	0	0	0	0.95	0.93	Not_Removed	Not_Removed	Not_Removed	Not_Removed
47	1385940.3	Bifidobacterium	breve	NA	1385940	JCM 7019	1	NA	PRJNA214951	SAMN03081480	GCA_000569015.1	CP006713.1	Adult feces	Complete	Roche 454|Illumina	2359009	58.6	2073	1915	100	0.935	Good	Human, Homo sapiens	2014-02-14	2014-12-08 22:10:28	2015-03-16 03:17:09	2033	1923	kingdom	1	0.95	0	0	0	0.92	0.87	Not_Removed	Not_Removed	Not_Removed	Not_Removed
48	1385941.3	Bifidobacterium	breve	NA	1385941	NCFB 2258	1	NA	PRJNA214954	SAMN03081481	GCA_000569035.1	CP006714.1	Infant feces	Complete	Roche 454|Illumina	2315904	58.7	1978	1834	100	0.952	Good	Human, Homo sapiens	2014-02-14	2014-12-08 22:10:28	2015-03-16 03:17:09	1946	1899	kingdom	1	0.98	0	0	0	0.94	0.92	Not_Removed	Not_Removed	Not_Removed	Not_Removed
49	1385942.3	Bifidobacterium	breve	NA	1385942	689b	1	NA	PRJNA214955	SAMN03081482	GCA_000569055.1	CP006715.1	Infant feces	Complete	Roche 454	2331707	58.7	1991	1821	100	0.952	Good	Human, Homo sapiens	2014-02-14	2014-12-08 22:10:28	2015-03-16 03:17:09	1949	1900	kingdom	1	0.97	0	0	0	0.94	0.92	Not_Removed	Not_Removed	Not_Removed	Not_Removed
50	1385943.3	Bifidobacterium	breve	NA	1385943	2L	6	NA	PRJNA214961	SAMN02951890	GCA_000568895.1	AWUG00000000	Milk	WGS	Ion Torrent	2240722	58.8	1920	1725	99.7	0.952	Good	Human, Homo sapiens	2014-02-13	2014-12-08 22:10:28	2015-03-16 03:17:09	1909	1861	kingdom	1	0.97	0	0	0	0.95	0.92	Not_Removed	Not_Removed	Not_Removed	Not_Removed
51	1385944.3	Bifidobacterium	breve	NA	1385944	31L	4	NA	PRJNA214962	SAMN02951889	GCA_000568875.1	AWUF00000000	Milk	WGS	Ion Torrent	2265654	58.6	1960	1734	100	0.944	Good	Human, Homo sapiens	2014-02-13	2014-12-08 22:10:28	2015-03-16 03:17:09	1933	1875	kingdom	1	0.97	0	0	0	0.95	0.92	Not_Removed	Not_Removed	Not_Removed	Not_Removed
52	1402194.3	Bifidobacterium	animalis	subsp. animalis	1402194	IM386	8	NA	PRJEB4710	SAMEA3158463	GCF_001039715.1	CBUQ010000000	Intestine	WGS	Unknown	1925687	60.47	1641	1508	99.7	0.952	Good	Human, Homo sapiens	2015-01-14	2016-01-17 16:10:32	2016-01-17 16:10:32	1568	1510	kingdom	1	0.96	0	0	0	0.93	0.89	Not_Removed	Not_Removed	Not_Removed	Not_Removed
53	1447715.5	Bifidobacterium	pseudolongum	NA	1447715	PV8-2	2	NA	PRJNA234364	SAMN03253091	GCA_000800475.1	CP007457.1,CP007458.1	Infant feces	Complete	PacBio	2036949	63.24	1696	1582	99.4	0.944	Good	Human, Homo sapiens	2014-12-09	2015-03-12 13:45:26	2015-03-16 03:17:09	1686	1664	kingdom	1	0.99	0	0	0	0.97	0.96	Not_Removed	Not_Removed	Not_Removed	Not_Removed
54	1447716.4	Bifidobacterium	kashiwanohense	NA	1447716	PV20-2	1	NA	PRJNA234365	SAMN03253090	GCA_000800455.1	CP007456.1	Infant feces	Complete	PacBio	2370978	56.12	2055	1875	100	0.96	Good	Human, Homo sapiens	2014-12-09	2015-03-12 13:45:26	2015-03-16 03:17:09	1989	1952	kingdom	1	0.98	0	0	0	0.98	0.96	Not_Removed	Not_Removed	Not_Removed	Not_Removed
55	1457183.3	Bifidobacterium	longum	subsp. infantis	1457183	EK3	38	NA	PRJNA236798	SAMN02862995	GCA_000730125.1	JNWB00000000	Feces	WGS	Illumina	2564809	59.4	2271	1999	100	0.952	Good	Human, Homo sapiens	2014-07-16	2014-12-08 23:08:14	2015-03-16 03:17:09	2273	2176	phylum	1	0.96	0.16	0.04	0.08	0.88	0.84	Not_Removed	Not_Removed	Not_Removed	Not_Removed
56	1457184.3	Bifidobacterium	longum	subsp. longum	1457184	72B	30	NA	PRJNA236797	SAMN02862994	GCA_000730045.1	JNWA00000000	Feces	WGS	Illumina	2374452	60.2	2052	1907	100	0.944	Good	Human, Homo sapiens	2014-07-16	2014-12-08 23:08:15	2015-03-16 03:17:09	2039	1963	kingdom	1	0.96	0	0	0	0.92	0.89	Not_Removed	Not_Removed	Not_Removed	Not_Removed
57	1457185.3	Bifidobacterium	longum	subsp. longum	1457185	EK5	28	NA	PRJNA236799	SAMN02862996	GCA_000730025.1	JNWC00000000	Feces	WGS	Illumina	2231287	59.7	1851	1734	100	0.944	Good	Human, Homo sapiens	2014-07-16	2014-12-08 23:08:15	2015-03-16 03:17:09	1846	1800	kingdom	1	0.98	0	0	0	0.94	0.92	Not_Removed	Not_Removed	Not_Removed	Not_Removed
58	1457186.3	Bifidobacterium	longum	subsp. longum	1457186	EK13	39	NA	PRJNA236800	SAMN02862997	GCA_000730135.1	JNWD00000000	Feces	WGS	Illumina	2474529	60	2138	1984	100	0.944	Good	Human, Homo sapiens	2014-07-16	2014-12-08 23:08:16	2015-03-16 03:17:09	2137	2017	phylum	1	0.94	0.13	0.02	0.04	0.92	0.87	Not_Removed	Not_Removed	Not_Removed	Not_Removed
59	158787.3	Bifidobacterium	scardovii	NA	158787	LMG 21589	34	25085493	PRJNA239864	SAMN02673452	GCA_000741405.1	JGZO00000000	Blood	WGS	Ion Torrent	3141793	64.6	2674	2480	100	0.944	Good	Human, Homo sapiens	2014-08-18	2014-12-08 23:13:21	2015-03-16 03:17:09	2572	2540	kingdom	1	0.99	0	0	0	0.98	0.97	Not_Removed	Removed	Not_Removed	Removed
60	1679.1	Bifidobacterium	longum	subsp. longum	1679	CCUG30698	1	26489930	PRJNA287222	SAMN03785819	GCF_001446275.1	CP011965	NA	Complete	PacBio	2458004	60.22	2172	1982	100	0.935	Good	Human, Homo sapiens	2015-11-19	2016-01-17 17:48:43	2016-01-17 17:48:43	2083	1925	kingdom	1	0.92	0	0	0	0.91	0.84	Not_Removed	Not_Removed	Not_Removed	Not_Removed
61	1679.1	Bifidobacterium	longum	subsp. longum	1679	MCC10098	58	29311585	PRJNA374900	SAMN06368652	GCA_004332835.1	SHSR00000000	Feces	WGS	Illumina	2326671	59.8618	1979	1864	NA	0.927	Good	Human, Homo sapiens	2019-03-08	2019-07-18 03:03:21	2019-07-18 03:03:21	1918	1865	kingdom	1	0.97	0	0	0	0.93	0.9	Not_Removed	Not_Removed	Not_Removed	Not_Removed
62	1679.101	Bifidobacterium	longum	subsp. longum	1679	MCC10095	95	29311585	PRJNA374900	SAMN06368649	GCA_004332855.1	SHSO00000000	Feces	WGS	Illumina	2356818	60.2749	2102	1922	NA	0.903	Good	Human, Homo sapiens	2019-03-08	2019-07-18 03:06:10	2019-07-18 03:06:10	2055	1992	kingdom	1	0.97	0	0	0	0.94	0.91	Not_Removed	Not_Removed	Not_Removed	Not_Removed
63	1679.102	Bifidobacterium	longum	subsp. longum	1679	MCC10093	57	29311585	PRJNA374900	SAMN06368647	GCA_004332865.1	SHSM00000000	Feces	WGS	Illumina	2458942	60.164	2182	2054	NA	0.935	Good	Human, Homo sapiens	2019-03-08	2019-07-18 03:06:39	2019-07-18 03:06:39	2115	2008	kingdom	1	0.95	0	0	0	0.92	0.87	Not_Removed	Not_Removed	Not_Removed	Not_Removed
64	1679.103	Bifidobacterium	longum	subsp. longum	1679	MCC10094	39	29311585	PRJNA374900	SAMN06368648	GCA_004332895.1	SHSN00000000	Feces	WGS	Illumina	2509624	59.8688	2286	2147	NA	0.935	Good	Human, Homo sapiens	2019-03-08	2019-07-18 03:06:46	2019-07-18 03:06:46	2210	2049	kingdom	1	0.93	0	0	0	0.92	0.85	Not_Removed	Not_Removed	Not_Removed	Not_Removed
65	1679.104	Bifidobacterium	longum	subsp. longum	1679	MCC10092	89	29311585	PRJNA374900	SAMN06368646	GCA_004332925.1	SHSL00000000	Feces	WGS	Illumina	2234829	59.9237	1935	1767	NA	0.919	Good	Human, Homo sapiens	2019-03-08	2019-07-18 03:04:36	2019-07-18 03:04:36	1868	1824	kingdom	1	0.98	0	0	0	0.94	0.92	Not_Removed	Not_Removed	Not_Removed	Not_Removed
66	1679.105	Bifidobacterium	longum	subsp. longum	1679	MCC10112	58	29311585	PRJNA374900	SAMN06368662	GCA_004332935.1	SHTB00000000	Feces	WGS	Illumina	2277568	60.0338	1950	1843	NA	0.935	Good	Human, Homo sapiens	2019-03-08	2019-07-18 03:04:36	2019-07-18 03:04:36	1907	1844	kingdom	1	0.97	0	0	0	0.94	0.91	Not_Removed	Not_Removed	Not_Removed	Not_Removed
67	1679.106	Bifidobacterium	longum	subsp. longum	1679	MCC10116	47	29311585	PRJNA374900	SAMN06368666	GCA_004332945.1	SHTF00000000	Feces	WGS	Illumina	2628982	60.0094	2356	2233	NA	0.944	Good	Human, Homo sapiens	2019-03-08	2019-07-18 03:05:12	2019-07-18 03:05:12	2290	2085	kingdom	1	0.91	0	0	0	0.9	0.82	Not_Removed	Not_Removed	Not_Removed	Not_Removed
68	1679.107	Bifidobacterium	longum	subsp. longum	1679	MCC10100	56	29311585	PRJNA374900	SAMN06368654	GCA_004332965.1	SHST00000000	Feces	WGS	Illumina	2518004	60.132	2229	2095	NA	0.944	Good	Human, Homo sapiens	2019-03-08	2019-07-18 03:07:38	2019-07-18 03:07:38	2155	2052	kingdom	1	0.95	0	0	0	0.92	0.87	Not_Removed	Not_Removed	Not_Removed	Not_Removed
69	1679.108	Bifidobacterium	longum	subsp. longum	1679	MCC10103	16	29311585	PRJNA374900	SAMN06368657	GCA_004333005.1	SHSW00000000	Feces	WGS	Illumina	2394684	59.9388	2118	2012	NA	0.944	Good	Human, Homo sapiens	2019-03-08	2019-07-18 03:05:20	2019-07-18 03:05:20	2051	1910	kingdom	1	0.93	0	0	0	0.92	0.85	Not_Removed	Not_Removed	Not_Removed	Not_Removed
70	1679.109	Bifidobacterium	longum	subsp. longum	1679	MCC10091	64	29311585	PRJNA374900	SAMN06368645	GCA_004333015.1	SHSK00000000	Feces	WGS	Illumina	2394210	60.0038	2114	1977	NA	0.935	Good	Human, Homo sapiens	2019-03-08	2019-07-18 03:08:01	2019-07-18 03:08:01	2040	1947	kingdom	1	0.95	0	0	0	0.93	0.88	Not_Removed	Not_Removed	Not_Removed	Not_Removed
71	1679.11	Bifidobacterium	longum	subsp. longum	1679	MCC10090	49	29311585	PRJNA374900	SAMN06368644	GCA_004333035.1	SHSJ00000000	Feces	WGS	Illumina	2347309	59.8412	2048	1930	NA	0.935	Good	Human, Homo sapiens	2019-03-08	2019-07-18 03:06:12	2019-07-18 03:06:12	1986	1892	kingdom	1	0.95	0	0	0	0.92	0.88	Not_Removed	Not_Removed	Not_Removed	Not_Removed
72	1679.111	Bifidobacterium	longum	subsp. longum	1679	MCC10096	39	29311585	PRJNA374900	SAMN06368650	GCA_004333045.1	SHSP00000000	Feces	WGS	Illumina	2571288	59.7025	2290	2179	NA	0.943	Good	Human, Homo sapiens	2019-03-08	2019-07-18 03:08:44	2019-07-18 03:08:44	2222	2032	kingdom	1	0.91	0	0	0	0.9	0.83	Not_Removed	Not_Removed	Not_Removed	Not_Removed
73	1679.112	Bifidobacterium	longum	subsp. longum	1679	MCC10089	41	29311585	PRJNA374900	SAMN06368643	GCA_004333065.1	SHSI00000000	Feces	WGS	Illumina	2324808	60.3067	1998	1888	NA	0.944	Good	Human, Homo sapiens	2019-03-08	2019-07-18 03:06:17	2019-07-18 03:06:17	1940	1868	kingdom	1	0.96	0	0	0	0.94	0.91	Not_Removed	Not_Removed	Not_Removed	Not_Removed
74	1679.113	Bifidobacterium	longum	subsp. longum	1679	MCC10087	49	29311585	PRJNA374900	SAMN06368642	GCA_004333105.1	SHSH00000000	Feces	WGS	Illumina	2303186	59.9742	1975	1857	NA	0.944	Good	Human, Homo sapiens	2019-03-08	2019-07-18 03:09:06	2019-07-18 03:09:06	1917	1851	kingdom	1	0.97	0	0	0	0.94	0.91	Not_Removed	Not_Removed	Not_Removed	Not_Removed
75	1679.114	Bifidobacterium	longum	subsp. longum	1679	MCC10086	48	29311585	PRJNA374900	SAMN06368641	GCA_004333115.1	SHSG00000000	Feces	WGS	Illumina	2283822	59.8256	1952	1832	NA	0.935	Good	Human, Homo sapiens	2019-03-08	2019-07-18 03:07:40	2019-07-18 03:07:40	1896	1839	kingdom	1	0.97	0	0	0	0.93	0.91	Not_Removed	Not_Removed	Not_Removed	Not_Removed
76	1679.115	Bifidobacterium	longum	subsp. longum	1679	MCC10084	46	29311585	PRJNA374900	SAMN06368639	GCA_004333125.1	SHSE00000000	Feces	WGS	Illumina	2264348	60.0955	1939	1839	NA	0.935	Good	Human, Homo sapiens	2019-03-08	2019-07-18 03:07:37	2019-07-18 03:07:37	1888	1827	kingdom	1	0.97	0	0	0	0.94	0.91	Not_Removed	Not_Removed	Not_Removed	Not_Removed
77	1679.116	Bifidobacterium	longum	subsp. longum	1679	MCC10081	56	29311585	PRJNA374900	SAMN06368637	GCA_004333165.1	SHSC00000000	Feces	WGS	Illumina	2323459	59.9267	2061	1946	NA	0.935	Good	Human, Homo sapiens	2019-03-08	2019-07-18 03:08:03	2019-07-18 03:08:03	2003	1887	kingdom	1	0.94	0	0	0	0.92	0.87	Not_Removed	Not_Removed	Not_Removed	Not_Removed
78	1679.117	Bifidobacterium	longum	subsp. longum	1679	MCC10078	58	29311585	PRJNA374900	SAMN06368634	GCA_004333205.1	SHRZ00000000	Feces	WGS	Illumina	2271979	59.771	1918	1803	NA	0.944	Good	Human, Homo sapiens	2019-03-08	2019-07-18 03:08:24	2019-07-18 03:08:24	1871	1815	kingdom	1	0.97	0	0	0	0.94	0.91	Not_Removed	Not_Removed	Not_Removed	Not_Removed
79	1679.118	Bifidobacterium	longum	subsp. longum	1679	MCC10080	59	29311585	PRJNA374900	SAMN06368636	GCA_004333175.1	SHSB00000000	Feces	WGS	Illumina	2528934	60.2111	2200	2077	NA	0.944	Good	Human, Homo sapiens	2019-03-08	2019-07-18 03:10:49	2019-07-18 03:10:49	2136	2034	kingdom	1	0.95	0	0	0	0.92	0.87	Not_Removed	Not_Removed	Not_Removed	Not_Removed
80	1679.119	Bifidobacterium	longum	subsp. longum	1679	MCC10079	77	29311585	PRJNA374900	SAMN06368635	GCA_004333215.1	SHSA00000000	Feces	WGS	Illumina	2382717	59.904	2118	1977	NA	0.935	Good	Human, Homo sapiens	2019-03-08	2019-07-18 03:10:58	2019-07-18 03:10:58	2051	1971	kingdom	1	0.96	0	0	0	0.92	0.89	Not_Removed	Not_Removed	Not_Removed	Not_Removed
81	1679.12	Bifidobacterium	longum	subsp. longum	1679	MCC10076	50	29311585	PRJNA374900	SAMN06368632	GCA_004333235.1	SHRX00000000	Feces	WGS	Illumina	2563554	60.1614	2340	2192	NA	0.927	Good	Human, Homo sapiens	2019-03-08	2019-07-18 03:09:27	2019-07-18 03:09:27	2274	2107	kingdom	1	0.93	0	0	0	0.9	0.83	Not_Removed	Not_Removed	Not_Removed	Not_Removed
82	1679.121	Bifidobacterium	longum	subsp. longum	1679	MCC10075	53	29311585	PRJNA374900	SAMN06368631	GCA_004333265.1	SHRW00000000	Feces	WGS	Illumina	2384970	60.1014	2107	1971	NA	0.919	Good	Human, Homo sapiens	2019-03-08	2019-07-18 03:09:29	2019-07-18 03:09:29	2042	1960	kingdom	1	0.96	0	0	0	0.92	0.89	Not_Removed	Not_Removed	Not_Removed	Not_Removed
83	1679.122	Bifidobacterium	longum	subsp. longum	1679	MCC10073	42	29311585	PRJNA374900	SAMN06368629	GCA_004333275.1	SHRU00000000	Feces	WGS	Illumina	2284295	59.736	1984	1886	NA	0.935	Good	Human, Homo sapiens	2019-03-08	2019-07-18 03:11:26	2019-07-18 03:11:26	1931	1861	kingdom	1	0.96	0	0	0	0.93	0.9	Not_Removed	Not_Removed	Not_Removed	Not_Removed
84	1679.123	Bifidobacterium	longum	subsp. longum	1679	MCC10071	49	29311585	PRJNA374900	SAMN06368627	GCA_004333305.1	SHRS00000000	Feces	WGS	Illumina	2287718	60.0321	1945	1842	NA	0.944	Good	Human, Homo sapiens	2019-03-08	2019-07-18 03:11:28	2019-07-18 03:11:28	1883	1839	kingdom	1	0.98	0	0	0	0.94	0.92	Not_Removed	Not_Removed	Not_Removed	Not_Removed
85	1679.124	Bifidobacterium	longum	subsp. longum	1679	MCC10070	48	29311585	PRJNA374900	SAMN06368626	GCA_004333325.1	SHRR00000000	Feces	WGS	Illumina	2508225	59.6072	2247	2115	NA	0.935	Good	Human, Homo sapiens	2019-03-08	2019-07-18 03:10:52	2019-07-18 03:10:52	2163	2000	kingdom	1	0.92	0	0	0	0.91	0.84	Not_Removed	Not_Removed	Not_Removed	Not_Removed
86	1679.125	Bifidobacterium	longum	subsp. longum	1679	MCC10069	57	29311585	PRJNA374900	SAMN06368625	GCA_004333335.1	SHRQ00000000	Feces	WGS	Illumina	2367175	59.9406	2048	1936	NA	0.944	Good	Human, Homo sapiens	2019-03-08	2019-07-18 03:12:27	2019-07-18 03:12:27	1993	1924	kingdom	1	0.97	0	0	0	0.93	0.9	Not_Removed	Not_Removed	Not_Removed	Not_Removed
87	1679.126	Bifidobacterium	longum	subsp. longum	1679	MCC10068	58	29311585	PRJNA374900	SAMN06368624	GCA_004333365.1	SHRP00000000	Feces	WGS	Illumina	2407868	59.7362	2071	1952	NA	0.935	Good	Human, Homo sapiens	2019-03-08	2019-07-18 03:10:50	2019-07-18 03:10:50	2003	1924	kingdom	1	0.96	0	0	0	0.92	0.88	Not_Removed	Not_Removed	Not_Removed	Not_Removed
88	1679.127	Bifidobacterium	longum	subsp. longum	1679	MCC10067	55	29311585	PRJNA374900	SAMN06368623	GCA_004333375.1	SHRO00000000	Feces	WGS	Illumina	2394373	59.6418	2091	1978	NA	0.935	Good	Human, Homo sapiens	2019-03-08	2019-07-18 03:13:04	2019-07-18 03:13:04	2024	1901	kingdom	1	0.94	0	0	0	0.92	0.86	Not_Removed	Not_Removed	Not_Removed	Not_Removed
89	1679.128	Bifidobacterium	longum	subsp. longum	1679	MCC10066	53	29311585	PRJNA374900	SAMN06368622	GCA_004333385.1	SHRN00000000	Feces	WGS	Illumina	2293826	59.7599	2022	1904	NA	0.927	Good	Human, Homo sapiens	2019-03-08	2019-07-18 03:10:52	2019-07-18 03:10:52	1962	1850	kingdom	1	0.94	0	0	0	0.92	0.87	Not_Removed	Not_Removed	Not_Removed	Not_Removed
90	1679.129	Bifidobacterium	longum	subsp. longum	1679	MCC10064	40	29311585	PRJNA374900	SAMN06368621	GCA_004333425.1	SHRM00000000	Feces	WGS	Illumina	2265777	59.9572	1934	1829	NA	0.935	Good	Human, Homo sapiens	2019-03-08	2019-07-18 03:11:05	2019-07-18 03:11:05	1886	1828	kingdom	1	0.97	0	0	0	0.93	0.91	Not_Removed	Not_Removed	Not_Removed	Not_Removed
91	1679.13	Bifidobacterium	longum	subsp. longum	1679	MC-42	29	NA	PRJNA302102	SAMN04263942	GCF_001516925.1	LNCM00000000	Infant feces	WGS	Illumina	2288251	59.81	1974	1801	100	0.944	Good	Human, Homo sapiens	2016-01-15	2016-02-02 21:07:55	2016-02-02 21:07:55	1903	1846	kingdom	1	0.97	0	0	0	0.93	0.9	Not_Removed	Not_Removed	Not_Removed	Not_Removed
92	1679.13	Bifidobacterium	longum	subsp. longum	1679	MCC10062	59	29311585	PRJNA374900	SAMN06368620	GCA_004333445.1	SHRL00000000	Feces	WGS	Illumina	2325915	59.8289	2005	1878	NA	0.944	Good	Human, Homo sapiens	2019-03-08	2019-07-18 03:14:03	2019-07-18 03:14:03	1952	1889	kingdom	1	0.97	0	0	0	0.93	0.9	Not_Removed	Not_Removed	Not_Removed	Not_Removed
93	1679.131	Bifidobacterium	longum	subsp. longum	1679	MCC10055	72	29311585	PRJNA374900	SAMN06368614	GCA_004333455.1	SHRF00000000	Feces	WGS	Illumina	2486026	60.0782	2216	2073	NA	0.935	Good	Human, Homo sapiens	2019-03-08	2019-07-18 03:14:40	2019-07-18 03:14:40	2158	2007	kingdom	1	0.93	0	0	0	0.92	0.85	Not_Removed	Not_Removed	Not_Removed	Not_Removed
94	1679.132	Bifidobacterium	longum	subsp. longum	1679	MCC10060	59	29311585	PRJNA374900	SAMN06368619	GCA_004333465.1	SHRK00000000	Feces	WGS	Illumina	2313106	60.1844	2001	1872	NA	0.935	Good	Human, Homo sapiens	2019-03-08	2019-07-18 03:12:20	2019-07-18 03:12:20	1944	1857	kingdom	1	0.96	0	0	0	0.93	0.88	Not_Removed	Not_Removed	Not_Removed	Not_Removed
95	1679.133	Bifidobacterium	longum	subsp. longum	1679	MCC10056	79	29311585	PRJNA374900	SAMN06368615	GCA_004333475.1	SHRG00000000	Feces	WGS	Illumina	2299748	59.9611	2022	1870	NA	0.927	Good	Human, Homo sapiens	2019-03-08	2019-07-18 03:12:20	2019-07-18 03:12:20	1962	1896	kingdom	1	0.97	0	0	0	0.93	0.9	Not_Removed	Not_Removed	Not_Removed	Not_Removed
96	1679.134	Bifidobacterium	longum	subsp. longum	1679	MCC10053	51	29311585	PRJNA374900	SAMN06368612	GCA_004333515.1	SHRD00000000	Feces	WGS	Illumina	2425822	60.2713	2140	2009	NA	0.927	Good	Human, Homo sapiens	2019-03-08	2019-07-18 03:15:59	2019-07-18 03:15:59	2065	1978	kingdom	1	0.96	0	0	0	0.92	0.88	Not_Removed	Not_Removed	Not_Removed	Not_Removed
97	1679.135	Bifidobacterium	longum	subsp. longum	1679	MCC10052	65	29311585	PRJNA374900	SAMN06368611	GCA_004333535.1	SHRC00000000	Feces	WGS	Illumina	2428737	60.1225	2156	1988	NA	0.935	Good	Human, Homo sapiens	2019-03-08	2019-07-18 03:13:39	2019-07-18 03:13:39	2084	2004	kingdom	1	0.96	0	0	0	0.93	0.89	Not_Removed	Not_Removed	Not_Removed	Not_Removed
98	1679.136	Bifidobacterium	longum	subsp. longum	1679	MCC10050	34	29311585	PRJNA374900	SAMN06368609	GCA_004333555.1	SHRA00000000	Feces	WGS	Illumina	2280366	59.7687	1930	1830	NA	0.935	Good	Human, Homo sapiens	2019-03-08	2019-07-18 03:13:42	2019-07-18 03:13:42	1872	1816	kingdom	1	0.97	0	0	0	0.94	0.91	Not_Removed	Not_Removed	Not_Removed	Not_Removed
99	1679.137	Bifidobacterium	longum	subsp. longum	1679	MCC10048	71	29311585	PRJNA374900	SAMN06368608	GCA_004333565.1	SHQZ00000000	Feces	WGS	Illumina	2456016	59.8037	2131	1997	NA	0.935	Good	Human, Homo sapiens	2019-03-08	2019-07-18 03:16:36	2019-07-18 03:16:36	2072	1985	kingdom	1	0.96	0	0	0	0.92	0.88	Not_Removed	Not_Removed	Not_Removed	Not_Removed
100	1679.138	Bifidobacterium	longum	subsp. longum	1679	MCC10046	71	29311585	PRJNA374900	SAMN06368606	GCA_004333575.1	SHQX00000000	Feces	WGS	Illumina	2286406	59.8978	1916	1795	NA	0.944	Good	Human, Homo sapiens	2019-03-08	2019-07-18 03:14:03	2019-07-18 03:14:03	1867	1820	kingdom	1	0.97	0	0	0	0.94	0.92	Not_Removed	Not_Removed	Not_Removed	Not_Removed
101	1679.139	Bifidobacterium	longum	subsp. longum	1679	MCC10045	61	29311585	PRJNA374900	SAMN06368605	GCA_004333625.1	SHQW00000000	Feces	WGS	Illumina	2437781	60.3374	2157	2035	NA	0.927	Good	Human, Homo sapiens	2019-03-08	2019-07-18 03:14:04	2019-07-18 03:14:04	2100	1997	kingdom	1	0.95	0	0	0	0.92	0.87	Not_Removed	Not_Removed	Not_Removed	Not_Removed
102	1679.14	Bifidobacterium	longum	subsp. longum	1679	LO-06	77	27340092	PRJDB4597	SAMD00047618	GCF_001686145.1	BCYH00000000	Infant feces	WGS	Illumina	2437471	60.04	2116	NA	100	0.935	Good	Human, Homo sapiens	2016-07-09	2016-08-26 21:09:14	2016-08-26 21:09:14	2062	1997	kingdom	1	0.97	0	0	0	0.92	0.89	Not_Removed	Not_Removed	Not_Removed	Not_Removed
103	1679.14	Bifidobacterium	longum	subsp. longum	1679	MCC10043	62	29311585	PRJNA374900	SAMN06368603	GCA_004333635.1	SHQU00000000	Feces	WGS	Illumina	2623861	59.5343	2316	2191	NA	0.935	Good	Human, Homo sapiens	2019-03-08	2019-07-18 03:17:02	2019-07-18 03:17:02	2253	2053	kingdom	1	0.91	0	0	0	0.9	0.82	Not_Removed	Not_Removed	Not_Removed	Not_Removed
104	1679.141	Bifidobacterium	longum	subsp. longum	1679	MCC10044	50	29311585	PRJNA374900	SAMN06368604	GCA_004333645.1	SHQV00000000	Feces	WGS	Illumina	2512809	60.346	2243	2097	NA	0.944	Good	Human, Homo sapiens	2019-03-08	2019-07-18 03:16:58	2019-07-18 03:16:58	2164	2067	kingdom	1	0.96	0	0	0	0.92	0.88	Not_Removed	Not_Removed	Not_Removed	Not_Removed
105	1679.142	Bifidobacterium	longum	subsp. longum	1679	MCC10042	53	29311585	PRJNA374900	SAMN06368602	GCA_004333675.1	SHQT00000000	Feces	WGS	Illumina	2320556	60.0834	2035	1924	NA	0.935	Good	Human, Homo sapiens	2019-03-08	2019-07-18 03:15:01	2019-07-18 03:15:01	1956	1896	kingdom	1	0.97	0	0	0	0.93	0.91	Not_Removed	Not_Removed	Not_Removed	Not_Removed
106	1679.143	Bifidobacterium	longum	subsp. longum	1679	MCC10041	47	29311585	PRJNA374900	SAMN06368601	GCA_004333695.1	SHQS00000000	Feces	WGS	Illumina	2370638	60.1322	2063	1950	NA	0.944	Good	Human, Homo sapiens	2019-03-08	2019-07-18 03:15:08	2019-07-18 03:15:08	2006	1912	kingdom	1	0.95	0	0	0	0.92	0.88	Not_Removed	Not_Removed	Not_Removed	Not_Removed
107	1679.144	Bifidobacterium	longum	subsp. longum	1679	MCC10035	52	29311585	PRJNA374900	SAMN06368596	GCA_004333715.1	SHQN00000000	Feces	WGS	Illumina	2457503	59.8202	2210	2064	NA	0.935	Good	Human, Homo sapiens	2019-03-08	2019-07-18 03:17:55	2019-07-18 03:17:55	2131	1983	kingdom	1	0.93	0	0	0	0.92	0.86	Not_Removed	Not_Removed	Not_Removed	Not_Removed
108	1679.145	Bifidobacterium	longum	subsp. longum	1679	MCC10036	22	29311585	PRJNA374900	SAMN06368597	GCA_004333735.1	SHQO00000000	Feces	WGS	Illumina	2249978	59.8906	1962	1861	NA	0.935	Good	Human, Homo sapiens	2019-03-08	2019-07-18 03:18:16	2019-07-18 03:18:16	1908	1845	kingdom	1	0.97	0	0	0	0.94	0.91	Not_Removed	Not_Removed	Not_Removed	Not_Removed
109	1679.146	Bifidobacterium	longum	subsp. longum	1679	MCC10034	70	29311585	PRJNA374900	SAMN06368595	GCA_004333765.1	SHQM00000000	Feces	WGS	Illumina	2253632	59.9881	1923	1808	NA	0.935	Good	Human, Homo sapiens	2019-03-08	2019-07-18 03:16:37	2019-07-18 03:16:37	1875	1833	kingdom	1	0.98	0	0	0	0.94	0.92	Not_Removed	Not_Removed	Not_Removed	Not_Removed
110	1679.147	Bifidobacterium	longum	subsp. longum	1679	MCC10033	63	29311585	PRJNA374900	SAMN06368594	GCA_004333775.1	SHQL00000000	Feces	WGS	Illumina	2392045	59.9839	2117	1984	NA	0.935	Good	Human, Homo sapiens	2019-03-08	2019-07-18 03:16:37	2019-07-18 03:16:37	2036	1976	kingdom	1	0.97	0	0	0	0.94	0.91	Not_Removed	Not_Removed	Not_Removed	Not_Removed
111	1679.148	Bifidobacterium	longum	subsp. longum	1679	MCC10031	41	29311585	PRJNA374900	SAMN06368593	GCA_004333785.1	SHQK00000000	Feces	WGS	Illumina	2401154	60.1148	2072	1957	NA	0.935	Good	Human, Homo sapiens	2019-03-08	2019-07-18 03:17:00	2019-07-18 03:17:00	2018	1944	kingdom	1	0.96	0	0	0	0.92	0.89	Not_Removed	Not_Removed	Not_Removed	Not_Removed
112	1679.149	Bifidobacterium	longum	subsp. longum	1679	MCC10025	56	29311585	PRJNA374900	SAMN06368588	GCA_004333845.1	SHQF00000000	Feces	WGS	Illumina	2408845	60.1123	2096	1958	NA	0.927	Good	Human, Homo sapiens	2019-03-08	2019-07-18 03:17:01	2019-07-18 03:17:01	2009	1927	kingdom	1	0.96	0	0	0	0.93	0.89	Not_Removed	Not_Removed	Not_Removed	Not_Removed
113	1679.15	Bifidobacterium	longum	subsp. longum	1679	MCC10029	55	29311585	PRJNA374900	SAMN06368591	GCA_004333795.1	SHQI00000000	Feces	WGS	Illumina	2346104	59.893	2030	1936	NA	0.944	Good	Human, Homo sapiens	2019-03-08	2019-07-18 03:19:08	2019-07-18 03:19:08	1999	1919	kingdom	1	0.96	0	0	0	0.93	0.89	Not_Removed	Not_Removed	Not_Removed	Not_Removed
114	1679.151	Bifidobacterium	longum	subsp. longum	1679	MCC10023	41	29311585	PRJNA374900	SAMN06368587	GCA_004333855.1	SHQE00000000	Feces	WGS	Illumina	2308165	60.2926	1989	1872	NA	0.935	Good	Human, Homo sapiens	2019-03-08	2019-07-18 03:19:31	2019-07-18 03:19:31	1930	1861	kingdom	1	0.96	0	0	0	0.94	0.91	Not_Removed	Not_Removed	Not_Removed	Not_Removed
115	1679.152	Bifidobacterium	longum	subsp. longum	1679	MCC10021	58	29311585	PRJNA374900	SAMN06368585	GCA_004333875.1	SHQC00000000	Feces	WGS	Illumina	2235753	60.0321	1920	1808	NA	0.935	Good	Human, Homo sapiens	2019-03-08	2019-07-18 03:17:53	2019-07-18 03:17:53	1876	1820	kingdom	1	0.97	0	0	0	0.94	0.91	Not_Removed	Not_Removed	Not_Removed	Not_Removed
116	1679.153	Bifidobacterium	longum	subsp. longum	1679	MCC10022	55	29311585	PRJNA374900	SAMN06368586	GCA_004333895.1	SHQD00000000	Feces	WGS	Illumina	2419042	59.7486	2130	2008	NA	0.935	Good	Human, Homo sapiens	2019-03-08	2019-07-18 03:18:17	2019-07-18 03:18:17	2073	1905	kingdom	1	0.92	0	0	0	0.91	0.84	Not_Removed	Not_Removed	Not_Removed	Not_Removed
117	1679.154	Bifidobacterium	longum	subsp. longum	1679	MCC10018	32	29311585	PRJNA374900	SAMN06368583	GCA_004333905.1	SHQA00000000	Feces	WGS	Illumina	2330414	60.0388	2045	1934	NA	0.935	Good	Human, Homo sapiens	2019-03-08	2019-07-18 03:21:13	2019-07-18 03:21:13	1987	1927	kingdom	1	0.97	0	0	0	0.94	0.91	Not_Removed	Not_Removed	Not_Removed	Not_Removed
118	1679.155	Bifidobacterium	longum	subsp. longum	1679	MCC10015	83	29311585	PRJNA374900	SAMN06368580	GCA_004333925.1	SHPX00000000	Feces	WGS	Illumina	2630290	59.9464	2393	2219	NA	0.935	Good	Human, Homo sapiens	2019-03-08	2019-07-18 03:22:37	2019-07-18 03:22:37	2308	2121	kingdom	1	0.92	0	0	0	0.9	0.83	Not_Removed	Not_Removed	Not_Removed	Not_Removed
119	1679.156	Bifidobacterium	longum	subsp. longum	1679	MCC10017	60	29311585	PRJNA374900	SAMN06368582	GCA_004333935.1	SHPZ00000000	Feces	WGS	Illumina	2448826	59.7042	2169	2038	NA	0.935	Good	Human, Homo sapiens	2019-03-08	2019-07-18 03:19:30	2019-07-18 03:19:30	2100	1967	kingdom	1	0.94	0	0	0	0.91	0.85	Not_Removed	Not_Removed	Not_Removed	Not_Removed
120	1679.157	Bifidobacterium	longum	subsp. longum	1679	MCC10014	59	29311585	PRJNA374900	SAMN06368579	GCA_004333975.1	SHPW00000000	Feces	WGS	Illumina	2466212	60.2345	2204	2059	NA	0.935	Good	Human, Homo sapiens	2019-03-08	2019-07-18 03:19:53	2019-07-18 03:19:53	2122	2020	kingdom	1	0.95	0	0	0	0.92	0.87	Not_Removed	Not_Removed	Not_Removed	Not_Removed
121	1679.158	Bifidobacterium	longum	subsp. longum	1679	MCC10010	93	29311585	PRJNA374900	SAMN06368576	GCA_004334005.1	SHPT00000000	Feces	WGS	Illumina	2452447	60.3574	2182	2028	NA	0.911	Good	Human, Homo sapiens	2019-03-08	2019-07-18 03:19:54	2019-07-18 03:19:54	2120	2019	kingdom	1	0.95	0	0	0	0.92	0.87	Not_Removed	Not_Removed	Not_Removed	Not_Removed
122	1679.159	Bifidobacterium	longum	subsp. longum	1679	MCC10012	67	29311585	PRJNA374900	SAMN06368578	GCA_004333995.1	SHPV00000000	Feces	WGS	Illumina	2479873	59.6488	2145	2015	NA	0.944	Good	Human, Homo sapiens	2019-03-08	2019-07-18 03:22:39	2019-07-18 03:22:39	2090	2024	phylum	1	0.97	0.52	0.02	0.05	0.93	0.9	Removed	Not_Removed	Not_Removed	Removed
123	1679.16	Bifidobacterium	longum	subsp. longum	1679	MCC10008	80	29311585	PRJNA374900	SAMN06368574	GCA_004334035.1	SHPR00000000	Feces	WGS	Illumina	2543674	59.9715	2326	2178	NA	0.935	Good	Human, Homo sapiens	2019-03-08	2019-07-18 03:20:01	2019-07-18 03:20:01	2263	2133	phylum	1	0.94	0.45	0.02	0.05	0.91	0.86	Removed	Not_Removed	Not_Removed	Removed
124	1679.161	Bifidobacterium	longum	subsp. longum	1679	MCC10007	59	29311585	PRJNA374900	SAMN06368573	GCA_004334045.1	SHPQ00000000	Feces	WGS	Illumina	2484629	60.1765	2241	2104	NA	0.944	Good	Human, Homo sapiens	2019-03-08	2019-07-18 03:22:37	2019-07-18 03:22:37	2155	2067	kingdom	1	0.96	0	0	0	0.93	0.89	Not_Removed	Not_Removed	Not_Removed	Not_Removed
125	1679.162	Bifidobacterium	longum	subsp. longum	1679	MCC10004	52	29311585	PRJNA374900	SAMN06368571	GCA_004334065.1	SHPO00000000	Feces	WGS	Illumina	2551732	60.016	2240	2095	NA	0.935	Good	Human, Homo sapiens	2019-03-08	2019-07-18 03:20:52	2019-07-18 03:20:52	2154	2058	kingdom	1	0.96	0	0	0	0.92	0.88	Not_Removed	Not_Removed	Not_Removed	Not_Removed
126	1679.163	Bifidobacterium	longum	subsp. longum	1679	MCC10003	69	29311585	PRJNA374900	SAMN06368570	GCA_004334075.1	SHPN00000000	Feces	WGS	Illumina	2526769	60.0929	2264	2094	NA	0.927	Good	Human, Homo sapiens	2019-03-08	2019-07-18 03:23:39	2019-07-18 03:23:39	2169	2084	kingdom	1	0.96	0	0	0	0.92	0.89	Not_Removed	Not_Removed	Not_Removed	Not_Removed
127	1679.164	Bifidobacterium	longum	subsp. longum	1679	MCC10085	64	29311585	PRJNA374900	SAMN06368640	GCA_004334105.1	SHSF00000000	Feces	WGS	Illumina	2366299	60.0022	2078	1949	NA	0.935	Good	Human, Homo sapiens	2019-03-08	2019-07-18 03:23:39	2019-07-18 03:23:39	2020	1943	kingdom	1	0.96	0	0	0	0.92	0.89	Not_Removed	Not_Removed	Not_Removed	Not_Removed
128	1679.165	Bifidobacterium	longum	subsp. longum	1679	MCC10083	64	29311585	PRJNA374900	SAMN06368638	GCA_004334145.1	SHSD00000000	Feces	WGS	Illumina	2475567	60.2497	2127	2001	NA	0.919	Good	Human, Homo sapiens	2019-03-08	2019-07-18 03:21:15	2019-07-18 03:21:15	2066	1980	kingdom	1	0.96	0	0	0	0.93	0.89	Not_Removed	Not_Removed	Not_Removed	Not_Removed
129	1679.166	Bifidobacterium	longum	subsp. longum	1679	MCC10077	40	29311585	PRJNA374900	SAMN06368633	GCA_004334155.1	SHRY00000000	Feces	WGS	Illumina	2411622	60.0201	2126	2014	NA	0.944	Good	Human, Homo sapiens	2019-03-08	2019-07-18 03:24:39	2019-07-18 03:24:39	2081	1957	kingdom	1	0.94	0	0	0	0.92	0.87	Not_Removed	Not_Removed	Not_Removed	Not_Removed
130	1679.167	Bifidobacterium	longum	subsp. longum	1679	MCC10074	34	29311585	PRJNA374900	SAMN06368630	GCA_004334165.1	SHRV00000000	Feces	WGS	Illumina	2410008	59.7644	2148	2036	NA	0.944	Good	Human, Homo sapiens	2019-03-08	2019-07-18 03:22:36	2019-07-18 03:22:36	2096	1919	kingdom	1	0.92	0	0	0	0.91	0.83	Not_Removed	Not_Removed	Not_Removed	Not_Removed
131	1679.168	Bifidobacterium	longum	subsp. longum	1679	MCC10072	23	29311585	PRJNA374900	SAMN06368628	GCA_004334205.1	SHRT00000000	Feces	WGS	Illumina	2233880	59.9767	1875	1787	NA	0.935	Good	Human, Homo sapiens	2019-03-08	2019-07-18 03:24:39	2019-07-18 03:24:39	1825	1780	kingdom	1	0.98	0	0	0	0.94	0.92	Not_Removed	Not_Removed	Not_Removed	Not_Removed
132	1679.169	Bifidobacterium	longum	subsp. longum	1679	MCC10058	65	29311585	PRJNA374900	SAMN06368617	GCA_004334215.1	SHRI00000000	Feces	WGS	Illumina	2329562	60.2222	2049	1899	NA	0.935	Good	Human, Homo sapiens	2019-03-08	2019-07-18 03:22:39	2019-07-18 03:22:39	1987	1913	kingdom	1	0.96	0	0	0	0.93	0.9	Not_Removed	Not_Removed	Not_Removed	Not_Removed
133	1679.17	Bifidobacterium	longum	subsp. longum	1679	MCC10059	47	29311585	PRJNA374900	SAMN06368618	GCA_004334235.1	SHRJ00000000	Feces	WGS	Illumina	2437180	60.015	2169	2062	NA	0.935	Good	Human, Homo sapiens	2019-03-08	2019-07-18 03:23:03	2019-07-18 03:23:03	2125	1990	kingdom	1	0.94	0	0	0	0.92	0.86	Not_Removed	Not_Removed	Not_Removed	Not_Removed
134	1679.171	Bifidobacterium	longum	subsp. longum	1679	MCC10054	61	29311585	PRJNA374900	SAMN06368613	GCA_004334245.1	SHRE00000000	Feces	WGS	Illumina	2295637	60.003	2018	1868	NA	0.935	Good	Human, Homo sapiens	2019-03-08	2019-07-18 03:23:00	2019-07-18 03:23:00	1962	1899	kingdom	1	0.97	0	0	0	0.94	0.91	Not_Removed	Not_Removed	Not_Removed	Not_Removed
135	1679.172	Bifidobacterium	longum	subsp. longum	1679	MCC10057	73	29311585	PRJNA374900	SAMN06368616	GCA_004334255.1	SHRH00000000	Feces	WGS	Illumina	2188617	59.89	1888	1735	NA	0.911	Good	Human, Homo sapiens	2019-03-08	2019-07-18 03:23:40	2019-07-18 03:23:40	1834	1784	kingdom	1	0.97	0	0	0	0.95	0.92	Not_Removed	Not_Removed	Not_Removed	Not_Removed
136	1679.173	Bifidobacterium	longum	subsp. longum	1679	MCC10051	42	29311585	PRJNA374900	SAMN06368610	GCA_004334285.1	SHRB00000000	Feces	WGS	Illumina	2303629	60.1064	2008	1894	NA	0.935	Good	Human, Homo sapiens	2019-03-08	2019-07-18 03:26:10	2019-07-18 03:26:10	1946	1877	kingdom	1	0.96	0	0	0	0.93	0.9	Not_Removed	Not_Removed	Not_Removed	Not_Removed
137	1679.174	Bifidobacterium	longum	subsp. longum	1679	MCC10047	64	29311585	PRJNA374900	SAMN06368607	GCA_004334325.1	SHQY00000000	Feces	WGS	Illumina	2364509	59.8808	2045	1922	NA	0.935	Good	Human, Homo sapiens	2019-03-08	2019-07-18 03:24:17	2019-07-18 03:24:17	1982	1924	kingdom	1	0.97	0	0	0	0.93	0.9	Not_Removed	Not_Removed	Not_Removed	Not_Removed
138	1679.175	Bifidobacterium	longum	subsp. longum	1679	MCC10039	34	29311585	PRJNA374900	SAMN06368599	GCA_004334335.1	SHQQ00000000	Feces	WGS	Illumina	2389049	59.9805	2094	1968	NA	0.935	Good	Human, Homo sapiens	2019-03-08	2019-07-18 03:25:31	2019-07-18 03:25:31	2027	1938	kingdom	1	0.96	0	0	0	0.93	0.89	Not_Removed	Not_Removed	Not_Removed	Not_Removed
139	1679.176	Bifidobacterium	longum	subsp. longum	1679	MCC10040	45	29311585	PRJNA374900	SAMN06368600	GCA_004334345.1	SHQR00000000	Feces	WGS	Illumina	2449960	60.1618	2173	2058	NA	0.935	Good	Human, Homo sapiens	2019-03-08	2019-07-18 03:27:58	2019-07-18 03:27:58	2107	1968	kingdom	1	0.93	0	0	0	0.91	0.85	Not_Removed	Not_Removed	Not_Removed	Not_Removed
140	1679.177	Bifidobacterium	longum	subsp. longum	1679	MCC10030	64	29311585	PRJNA374900	SAMN06368592	GCA_004334355.1	SHQJ00000000	Feces	WGS	Illumina	2518444	60.1295	2204	2082	NA	0.935	Good	Human, Homo sapiens	2019-03-08	2019-07-18 03:28:01	2019-07-18 03:28:01	2133	2045	kingdom	1	0.96	0	0	0	0.92	0.88	Not_Removed	Not_Removed	Not_Removed	Not_Removed
141	1679.178	Bifidobacterium	longum	subsp. longum	1679	MCC10028	44	29311585	PRJNA374900	SAMN06368590	GCA_004334425.1	SHQH00000000	Feces	WGS	Illumina	2425414	60.2133	2173	2031	NA	0.935	Good	Human, Homo sapiens	2019-03-08	2019-07-18 03:25:32	2019-07-18 03:25:32	2085	1986	kingdom	1	0.95	0	0	0	0.92	0.88	Not_Removed	Not_Removed	Not_Removed	Not_Removed
142	1679.179	Bifidobacterium	longum	subsp. longum	1679	MCC10038	38	29311585	PRJNA374900	SAMN06368598	GCA_004334365.1	SHQP00000000	Feces	WGS	Illumina	2367010	59.9316	2139	2022	NA	0.935	Good	Human, Homo sapiens	2019-03-08	2019-07-18 03:28:00	2019-07-18 03:28:00	2073	1954	kingdom	1	0.94	0	0	0	0.91	0.86	Not_Removed	Not_Removed	Not_Removed	Not_Removed
143	1679.18	Bifidobacterium	longum	subsp. longum	1679	MCC10019	41	29311585	PRJNA374900	SAMN06368584	GCA_004334435.1	SHQB00000000	Feces	WGS	Illumina	2304529	60.0912	2017	1899	NA	0.935	Good	Human, Homo sapiens	2019-03-08	2019-07-18 03:26:07	2019-07-18 03:26:07	1951	1882	kingdom	1	0.96	0	0	0	0.93	0.9	Not_Removed	Not_Removed	Not_Removed	Not_Removed
144	1679.181	Bifidobacterium	longum	subsp. longum	1679	MCC10027	59	29311585	PRJNA374900	SAMN06368589	GCA_004334445.1	SHQG00000000	Feces	WGS	Illumina	2505832	59.8746	2232	2106	NA	0.944	Good	Human, Homo sapiens	2019-03-08	2019-07-18 03:26:11	2019-07-18 03:26:11	2169	2002	kingdom	1	0.92	0	0	0	0.92	0.84	Not_Removed	Not_Removed	Not_Removed	Not_Removed
145	1679.182	Bifidobacterium	longum	subsp. longum	1679	MCC10016	66	29311585	PRJNA374900	SAMN06368581	GCA_004334465.1	SHPY00000000	Feces	WGS	Illumina	2371177	60.0412	2060	1922	NA	0.944	Good	Human, Homo sapiens	2019-03-08	2019-07-18 03:28:36	2019-07-18 03:28:36	2003	1932	kingdom	1	0.96	0	0	0	0.93	0.89	Not_Removed	Not_Removed	Not_Removed	Not_Removed
146	1679.183	Bifidobacterium	longum	subsp. longum	1679	MCC10011	34	29311585	PRJNA374900	SAMN06368577	GCA_004334485.1	SHPU00000000	Feces	WGS	Illumina	2397460	59.9392	2081	1979	NA	0.935	Good	Human, Homo sapiens	2019-03-08	2019-07-18 03:28:37	2019-07-18 03:28:37	2014	1909	kingdom	1	0.95	0	0	0	0.93	0.88	Not_Removed	Not_Removed	Not_Removed	Not_Removed
147	1679.184	Bifidobacterium	longum	subsp. longum	1679	MCC10009	60	29311585	PRJNA374900	SAMN06368575	GCA_004334515.1	SHPS00000000	Feces	WGS	Illumina	2523697	60.121	2204	2082	NA	0.935	Good	Human, Homo sapiens	2019-03-08	2019-07-18 03:26:47	2019-07-18 03:26:47	2128	2044	kingdom	1	0.96	0	0	0	0.92	0.89	Not_Removed	Not_Removed	Not_Removed	Not_Removed
148	1679.185	Bifidobacterium	longum	subsp. longum	1679	MCC10006	83	29311585	PRJNA374900	SAMN06368572	GCA_004334535.1	SHPP00000000	Feces	WGS	Illumina	2450141	60.3502	2181	2029	NA	0.935	Good	Human, Homo sapiens	2019-03-08	2019-07-18 03:27:08	2019-07-18 03:27:08	2101	2007	kingdom	1	0.96	0	0	0	0.92	0.88	Not_Removed	Not_Removed	Not_Removed	Not_Removed
149	1679.186	Bifidobacterium	longum	subsp. longum	1679	MCC10002	59	29311585	PRJNA374900	SAMN06368569	GCA_004334545.1	SHPM00000000	Feces	WGS	Illumina	2634509	59.9525	2413	2260	NA	0.935	Good	Human, Homo sapiens	2019-03-08	2019-07-18 03:30:14	2019-07-18 03:30:14	2328	2104	kingdom	1	0.9	0	0	0	0.9	0.81	Not_Removed	Not_Removed	Not_Removed	Not_Removed
150	1679.187	Bifidobacterium	longum	subsp. longum	1679	MCC10212	28	29311585	PRJNA374900	SAMN06368681	GCA_004334555.1	SHTQ00000000	Feces	WGS	Illumina	2365474	59.8618	2087	1978	NA	0.944	Good	Human, Homo sapiens	2019-03-08	2019-07-18 03:29:52	2019-07-18 03:29:52	2020	1938	kingdom	1	0.96	0	0	0	0.93	0.89	Not_Removed	Not_Removed	Not_Removed	Not_Removed
151	1679.188	Bifidobacterium	longum	subsp. longum	1679	MCC10127	41	29311585	PRJNA374900	SAMN06368677	GCA_004334615.1	SHTS00000000	Feces	WGS	Illumina	2356733	60.0973	2036	1930	NA	0.935	Good	Human, Homo sapiens	2019-03-08	2019-07-18 03:28:22	2019-07-18 03:28:22	1979	1911	kingdom	1	0.97	0	0	0	0.93	0.9	Not_Removed	Not_Removed	Not_Removed	Not_Removed
152	1679.189	Bifidobacterium	longum	subsp. longum	1679	MCC10130	59	29311585	PRJNA374900	SAMN06368680	GCA_004334625.1	SHTR00000000	Feces	WGS	Illumina	2368573	60.0002	2078	1960	NA	0.944	Good	Human, Homo sapiens	2019-03-08	2019-07-18 03:28:29	2019-07-18 03:28:29	2021	1943	kingdom	1	0.96	0	0	0	0.92	0.89	Not_Removed	Not_Removed	Not_Removed	Not_Removed
153	1679.19	Bifidobacterium	longum	subsp. longum	1679	MCC10126	68	29311585	PRJNA374900	SAMN06368676	GCA_004334635.1	SHTN00000000	Feces	WGS	Illumina	2553070	59.7865	2258	2109	NA	0.927	Good	Human, Homo sapiens	2019-03-08	2019-07-18 03:29:29	2019-07-18 03:29:29	2187	2007	kingdom	1	0.92	0	0	0	0.91	0.84	Not_Removed	Not_Removed	Not_Removed	Not_Removed
154	1679.191	Bifidobacterium	longum	subsp. longum	1679	MCC10124	47	29311585	PRJNA374900	SAMN06368674	GCA_004334645.1	SHTL00000000	Feces	WGS	Illumina	2457023	60.1162	2155	2024	NA	0.935	Good	Human, Homo sapiens	2019-03-08	2019-07-18 03:31:21	2019-07-18 03:31:21	2077	1998	kingdom	1	0.96	0	0	0	0.92	0.88	Not_Removed	Not_Removed	Not_Removed	Not_Removed
155	1679.192	Bifidobacterium	longum	subsp. longum	1679	MCC10121	26	29311585	PRJNA374900	SAMN06368671	GCA_004334695.1	SHTJ00000000	Feces	WGS	Illumina	2384465	59.983	2089	1969	NA	0.935	Good	Human, Homo sapiens	2019-03-08	2019-07-18 03:29:28	2019-07-18 03:29:28	2017	1936	kingdom	1	0.96	0	0	0	0.93	0.89	Not_Removed	Not_Removed	Not_Removed	Not_Removed
156	1679.193	Bifidobacterium	longum	subsp. longum	1679	MCC10118	36	29311585	PRJNA374900	SAMN06368668	GCA_004334705.1	SHTH00000000	Feces	WGS	Illumina	2349751	59.9468	2045	1925	NA	0.952	Good	Human, Homo sapiens	2019-03-08	2019-07-18 03:29:52	2019-07-18 03:29:52	1979	1915	kingdom	1	0.97	0	0	0	0.93	0.9	Not_Removed	Not_Removed	Not_Removed	Not_Removed
157	1679.194	Bifidobacterium	longum	subsp. longum	1679	MCC10120	62	29311585	PRJNA374900	SAMN06368670	GCA_004334715.1	SHTU00000000	Feces	WGS	Illumina	2483766	60.1713	2206	2071	NA	0.935	Good	Human, Homo sapiens	2019-03-08	2019-07-18 03:30:15	2019-07-18 03:30:15	2127	2036	kingdom	1	0.96	0	0	0	0.92	0.88	Not_Removed	Not_Removed	Not_Removed	Not_Removed
158	1679.195	Bifidobacterium	longum	subsp. longum	1679	MCC10117	35	29311585	PRJNA374900	SAMN06368667	GCA_004334745.1	SHTG00000000	Feces	WGS	Illumina	2301675	59.8563	1958	1845	NA	0.935	Good	Human, Homo sapiens	2019-03-08	2019-07-18 03:33:00	2019-07-18 03:33:00	1896	1838	kingdom	1	0.97	0	0	0	0.94	0.91	Not_Removed	Not_Removed	Not_Removed	Not_Removed
159	1679.196	Bifidobacterium	longum	subsp. longum	1679	MCC10129	18	29311585	PRJNA374900	SAMN06368679	GCA_004334775.1	SHTP00000000	Feces	WGS	Illumina	2273526	60.0956	1928	1850	NA	0.944	Good	Human, Homo sapiens	2019-03-08	2019-07-18 03:32:58	2019-07-18 03:32:58	1897	1839	kingdom	1	0.97	0	0	0	0.94	0.91	Not_Removed	Not_Removed	Not_Removed	Not_Removed
160	1679.197	Bifidobacterium	longum	subsp. longum	1679	MCC10128	57	29311585	PRJNA374900	SAMN06368678	GCA_004334785.1	SHTO00000000	Feces	WGS	Illumina	2509605	59.9411	2290	2138	NA	0.944	Good	Human, Homo sapiens	2019-03-08	2019-07-18 03:33:37	2019-07-18 03:33:37	2208	2013	kingdom	1	0.91	0	0	0	0.9	0.82	Not_Removed	Not_Removed	Not_Removed	Not_Removed
161	1679.198	Bifidobacterium	longum	subsp. longum	1679	MCC10125	43	29311585	PRJNA374900	SAMN06368675	GCA_004334795.1	SHTM00000000	Feces	WGS	Illumina	2447743	60.1534	2146	2021	NA	0.935	Good	Human, Homo sapiens	2019-03-08	2019-07-18 03:31:22	2019-07-18 03:31:22	2087	2003	kingdom	1	0.96	0	0	0	0.92	0.88	Not_Removed	Not_Removed	Not_Removed	Not_Removed
162	1679.199	Bifidobacterium	longum	subsp. longum	1679	MCC10123	49	29311585	PRJNA374900	SAMN06368673	GCA_004334815.1	SHTK00000000	Feces	WGS	Illumina	2506502	59.676	2262	2128	NA	0.935	Good	Human, Homo sapiens	2019-03-08	2019-07-18 03:31:29	2019-07-18 03:31:29	2168	2017	phylum	1	0.93	0.73	0.03	0.05	0.92	0.86	Removed	Not_Removed	Not_Removed	Removed
163	1679.2	Bifidobacterium	longum	subsp. longum	1679	LO-10	80	27340092	PRJDB4597	SAMD00047619	GCF_001686165.1	BCYI00000000	Infant feces	WGS	Illumina	2540238	60.28	2240	NA	100	0.935	Good	Human, Homo sapiens	2016-07-09	2016-09-11 13:58:14	2016-09-11 13:58:14	2187	2090	kingdom	1	0.96	0	0	0	0.92	0.88	Not_Removed	Not_Removed	Not_Removed	Not_Removed
164	1679.2	Bifidobacterium	longum	subsp. longum	1679	MCC10119	45	29311585	PRJNA374900	SAMN06368669	GCA_004334865.1	SHTI00000000	Feces	WGS	Illumina	2486893	60.0911	2244	2109	NA	0.935	Good	Human, Homo sapiens	2019-03-08	2019-07-18 03:34:00	2019-07-18 03:34:00	2161	2063	kingdom	1	0.95	0	0	0	0.91	0.87	Not_Removed	Not_Removed	Not_Removed	Not_Removed
165	1679.201	Bifidobacterium	longum	subsp. longum	1679	MCC10122	49	29311585	PRJNA374900	SAMN06368672	GCA_004334855.1	SHTT00000000	Feces	WGS	Illumina	2460426	60.1317	2153	2025	NA	0.935	Good	Human, Homo sapiens	2019-03-08	2019-07-18 03:33:58	2019-07-18 03:33:58	2072	2001	kingdom	1	0.97	0	0	0	0.93	0.9	Not_Removed	Not_Removed	Not_Removed	Not_Removed
166	1679.207	Bifidobacterium	longum	subsp. longum	1679	CR15	58	31201276	PRJNA540282	SAMN11527969	GCA_006438975.1	SZNG00000000	Feces	WGS	Illumina	2403135	60.3246	2157	2092	NA	0.944	Good	Human, Homo sapiens	2019-06-24	2019-09-30 08:54:26	2019-09-30 08:54:26	2046	1950	kingdom	1	0.95	0	0	0	0.92	0.88	Not_Removed	Not_Removed	Not_Removed	Not_Removed
167	1679.21	Bifidobacterium	longum	subsp. longum	1679	LO-21	71	27340092	PRJDB4597	SAMD00047620	GCF_001686185.1	BCYJ00000000	Infant feces	WGS	Illumina	2656034	60.14	2234	NA	100	0.935	Good	Human, Homo sapiens	2016-07-09	2016-09-11 14:03:12	2016-09-11 14:03:12	2198	2131	kingdom	1	0.97	0	0	0	0.94	0.91	Not_Removed	Not_Removed	Not_Removed	Not_Removed
168	1679.22	Bifidobacterium	longum	subsp. longum	1679	LO-C29	49	27340092	PRJDB4597	SAMD00047621	GCF_001686205.1	BCYK00000000	Infant feces	WGS	Illumina	2483869	59.99	2112	NA	100	0.927	Good	Human, Homo sapiens	2016-07-09	2016-09-11 14:03:44	2016-09-11 14:03:44	2058	1990	kingdom	1	0.97	0	0	0	0.93	0.9	Not_Removed	Not_Removed	Not_Removed	Not_Removed
169	1679.228	Bifidobacterium	longum	subsp. longum	1679	UMA3015	72	NA	PRJNA419938	SAMN10387520		RJJN00000000	Infant feces	WGS	Illumina	2410101	60.2431	2222	2134	NA	0.944	Good	Human, Homo sapiens	2020-01-16	2020-02-01 18:39:04	2020-02-01 18:39:04	2093	1952	kingdom	1	0.93	0	0	0	0.91	0.85	Not_Removed	Not_Removed	Not_Removed	Not_Removed
170	1679.23	Bifidobacterium	longum	subsp. longum	1679	LO-K29a	85	27340092	PRJDB4597	SAMD00047622	GCF_001686225.1	BCYL00000000	Infant feces	WGS	Illumina	2449180	59.99	2128	NA	100	0.935	Good	Human, Homo sapiens	2016-07-09	2016-09-11 14:05:33	2016-09-11 14:05:33	2070	2008	kingdom	1	0.97	0	0	0	0.93	0.9	Not_Removed	Not_Removed	Not_Removed	Not_Removed
171	1679.24	Bifidobacterium	longum	subsp. longum	1679	LO-K29b	97	27340092	PRJDB4597	SAMD00047623	GCF_001686245.1	BCYM00000000	Infant feces	WGS	Illumina	2372714	60.14	2083	NA	100	0.944	Good	Human, Homo sapiens	2016-07-09	2016-09-11 14:04:55	2016-09-11 14:04:55	2025	1976	kingdom	1	0.98	0	0	0	0.94	0.92	Not_Removed	Not_Removed	Not_Removed	Not_Removed
172	1679.24	Bifidobacterium	longum	subsp. longum	1679	BIO6283	16	NA	PRJNA574342	SAMN14848233		JABRBV000000000	Intestine	WGS	Illumina	2251436	59.89	1959	1857	NA	0.935	Good	Human, Homo sapiens	2020-06-02	2020-07-01 03:17:55	2020-07-01 03:17:55	1909	1846	kingdom	1	0.97	0	0	0	0.94	0.91	Not_Removed	Not_Removed	Not_Removed	Not_Removed
173	1679.241	Bifidobacterium	longum	subsp. longum	1679	YS108R	1	NA	PRJNA474590	SAMN09355369	GCA_013393765.1	CP029796	Infants	Complete	PacBio	2520995	60.1392	2299	2206	NA	0.944	Good	Human, Homo sapiens	2020-07-08	2020-07-28 06:35:21	2020-07-28 06:35:21	2178	2039	kingdom	1	0.94	0	0	0	0.91	0.85	Not_Removed	Not_Removed	Not_Removed	Not_Removed
174	1679.26	Bifidobacterium	longum	subsp. longum	1679	AH1206	1	NA	PRJNA316119	SAMN04576213	GCF_001725985.1	CP016019	Infants	Complete	Roche 454	2421287	60.19	2157	2056	100	0.935	Good	Human, Homo sapiens	2016-09-14	2016-11-16 07:12:42	2016-11-16 07:12:42	2069	1948	kingdom	1	0.94	0	0	0	0.92	0.87	Not_Removed	Not_Removed	Not_Removed	Not_Removed
175	1679.262	Bifidobacterium	longum	subsp. longum	1679	815	63	NA	PRJNA551112	SAMN12139133		VICA00000000	Infant feces	WGS	Illumina	2246954	59.6376	1957	1907	NA	0.935	Good	Human, Homo sapiens	1900-01-01	2020-11-28 23:45:38	2020-11-28 23:45:38	1847	1807	phylum	0.99	0.97	1	0.02	0.04	0.94	0.91	Removed	Not_Removed	Not_Removed	Removed
176	1679.263	Bifidobacterium	longum	subsp. longum	1679	KCTC 5914	1	NA	PRJNA666145	SAMN16287599	GCA_014898115.1	CP062947	Feces	Complete	PacBio	2305636	59.8135	1998	1864	NA	0.944	Good	Human, Homo sapiens	2020-10-20	2020-11-29 18:14:25	2020-11-29 18:14:25	1897	1854	kingdom	1	0.98	0	0	0	0.94	0.92	Not_Removed	Not_Removed	Not_Removed	Not_Removed
177	1679.264	Bifidobacterium	longum	subsp. longum	1679	JCM 7050	1	NA	PRJNA666154	SAMN16365389	GCA_014898215.1	CP062949	Feces	Complete	PacBio	2389025	60.0949	2044	1925	NA	0.943	Good	Human, Homo sapiens	2020-10-20	2020-11-29 18:14:24	2020-11-29 18:14:24	1947	1867	kingdom	1	0.96	0	0	0	0.93	0.89	Not_Removed	Not_Removed	Not_Removed	Not_Removed
178	1679.265	Bifidobacterium	longum	subsp. longum	1679	JCM 11341	1	NA	PRJNA666151	SAMN16365390	GCA_014898235.1	CP062950	Infant feces	Complete	PacBio	2469698	60.3106	2192	2074	NA	0.944	Good	Human, Homo sapiens	2020-10-20	2020-11-29 18:14:25	2020-11-29 18:14:25	2083	2003	kingdom	1	0.96	0	0	0	0.92	0.89	Not_Removed	Not_Removed	Not_Removed	Not_Removed
179	1679.267	Bifidobacterium	longum	subsp. longum	1679	JCM 11343	1	NA	PRJNA666148	SAMN16365392	GCA_014900535.1	CP062940	Infant feces	Complete	PacBio	2487475	60.3736	2192	2058	NA	0.952	Good	Human, Homo sapiens	2020-10-20	2020-11-30 12:59:45	2020-11-30 12:59:45	2088	2023	kingdom	1	0.97	0	0	0	0.93	0.9	Not_Removed	Not_Removed	Not_Removed	Not_Removed
180	1679.27	Bifidobacterium	longum	subsp. longum	1679	JCM 7052	1	NA	PRJDB9197	SAMD00200813	GCA_015100215.1	AP022379	Feces	Complete	Illumina	2273627	59.8912	1987	1929	NA	0.944	Good	Human, Homo sapiens	2020-10-20	2020-11-30 12:59:45	2020-11-30 12:59:45	1908	1837	kingdom	1	0.96	0	0	0	0.92	0.89	Not_Removed	Not_Removed	Not_Removed	Not_Removed
181	1679.271	Bifidobacterium	longum	subsp. longum	1679	JCM 11340	1	NA	PRJNA667574	SAMN16378287	GCA_015101725.1	CP062945	Infant feces	Complete	PacBio	2467500	60.2937	2192	2077	NA	0.944	Good	Human, Homo sapiens	2020-10-20	2020-11-30 00:51:05	2020-11-30 00:51:05	2090	2008	kingdom	1	0.96	0	0	0	0.92	0.89	Not_Removed	Not_Removed	Not_Removed	Not_Removed
182	1679.279	Bifidobacterium	longum	subsp. longum	1679	VKPM Ac-1635	19	NA	PRJNA656137	SAMN15880061		JACTOE000000000	Feces	WGS	Illumina	2240429	60.073	1900	1783	NA	0.944	Good	Human, Homo sapiens	2020-12-15	2021-01-01 19:45:11	2021-01-01 19:45:11	1843	1804	kingdom	1	0.98	0	0	0	0.93	0.91	Not_Removed	Not_Removed	Not_Removed	Not_Removed
183	1679.28	Bifidobacterium	longum	subsp. longum	1679	CECT7894	31	31861401	PRJNA589035	SAMN13264073		WKJF00000000	Infant feces	WGS	Illumina	2286958	59.8769	1987	1898	NA	0.944	Good	Human, Homo sapiens	1900-01-01	2021-02-01 05:48:08	2021-02-01 05:48:08	1903	1846	kingdom	1	0.97	0	0	0	0.93	0.9	Not_Removed	Not_Removed	Not_Removed	Not_Removed
184	1679.281	Bifidobacterium	longum	subsp. longum	1679	39B	25	NA	PRJNA666301	SAMN16287680		JACZEJ000000000	Feces	WGS	Illumina	2287000	59.9042	1940	1842	NA	0.944	Good	Human, Homo sapiens	1900-01-01	2021-02-01 06:01:59	2021-02-01 06:01:59	1883	1837	kingdom	1	0.98	0	0	0	0.94	0.92	Not_Removed	Not_Removed	Not_Removed	Not_Removed
185	1679.282	Bifidobacterium	longum	subsp. longum	1679	1898B	9	NA	PRJNA666301	SAMN16287679		JACZEK000000000	Feces	WGS	Illumina	2464874	59.9426	2129	2008	NA	0.944	Good	Human, Homo sapiens	1900-01-01	2021-02-01 06:01:30	2021-02-01 06:01:30	2056	1992	kingdom	1	0.97	0	0	0	0.93	0.9	Not_Removed	Not_Removed	Not_Removed	Not_Removed
186	1679.283	Bifidobacterium	longum	subsp. longum	1679	458B	37	NA	PRJNA692178	SAMN17315595		JAESIN000000000	Feces	WGS	Illumina	2424191	60.1704	2162	2043	NA	0.944	Good	Human, Homo sapiens	1900-01-01	2021-02-01 08:11:22	2021-02-01 08:11:22	2091	1984	kingdom	1	0.95	0	0	0	0.91	0.87	Not_Removed	Not_Removed	Not_Removed	Not_Removed
187	1679.284	Bifidobacterium	longum	subsp. longum	1679	359B	45	NA	PRJNA692178	SAMN17315594		JAERWD000000000	Feces	WGS	Illumina	2424328	60.0893	2161	2027	NA	0.952	Good	Human, Homo sapiens	1900-01-01	2021-02-01 08:11:56	2021-02-01 08:11:56	2078	1996	kingdom	1	0.96	0	0	0	0.93	0.89	Not_Removed	Not_Removed	Not_Removed	Not_Removed
188	1679.285	Bifidobacterium	longum	subsp. longum	1679	67B	29	NA	PRJNA692178	SAMN17315590		JAERWH000000000	Feces	WGS	Illumina	2386390	60.0409	2139	2021	NA	0.935	Good	Human, Homo sapiens	1900-01-01	2021-02-01 08:16:40	2021-02-01 08:16:40	2062	1916	kingdom	1	0.93	0	0	0	0.91	0.85	Not_Removed	Not_Removed	Not_Removed	Not_Removed
189	1679.286	Bifidobacterium	longum	subsp. longum	1679	134B	38	NA	PRJNA692178	SAMN17315592		JAERWF000000000	Feces	WGS	Illumina	2308223	59.8048	1980	1888	NA	0.919	Good	Human, Homo sapiens	1900-01-01	2021-02-01 08:11:23	2021-02-01 08:11:23	1910	1854	kingdom	1	0.97	0	0	0	0.94	0.91	Not_Removed	Not_Removed	Not_Removed	Not_Removed
190	1679.287	Bifidobacterium	longum	subsp. longum	1679	108B	27	NA	PRJNA692178	SAMN17315591		JAERWG000000000	Feces	WGS	Illumina	2305647	59.8952	1991	1886	NA	0.935	Good	Human, Homo sapiens	1900-01-01	2021-02-01 08:14:19	2021-02-01 08:14:19	1904	1845	kingdom	1	0.97	0	0	0	0.94	0.91	Not_Removed	Not_Removed	Not_Removed	Not_Removed
191	1679.288	Bifidobacterium	longum	subsp. longum	1679	3B	28	NA	PRJNA692178	SAMN17315588		JAERWJ000000000	Feces	WGS	Illumina	2462606	59.6724	2161	2032	NA	0.943	Good	Human, Homo sapiens	1900-01-01	2021-02-01 08:11:27	2021-02-01 08:11:27	2088	1945	kingdom	1	0.93	0	0	0	0.92	0.86	Not_Removed	Not_Removed	Not_Removed	Not_Removed
192	1679.289	Bifidobacterium	longum	subsp. longum	1679	20B	31	NA	PRJNA692178	SAMN17315589		JAERWI000000000	Feces	WGS	Illumina	2459997	59.6463	2153	2018	NA	0.935	Good	Human, Homo sapiens	1900-01-01	2021-02-01 08:11:20	2021-02-01 08:11:20	2066	1916	kingdom	1	0.93	0	0	0	0.92	0.85	Not_Removed	Not_Removed	Not_Removed	Not_Removed
193	1679.29	Bifidobacterium	longum	subsp. longum	1679	296B	40	NA	PRJNA348831	SAMN05916052	GCA_001892965.1	MLZK00000000	Infant feces	WGS	Ion Torrent	2253175	59.86	1994	1850	100	0.944	Good	Human, Homo sapiens	2016-12-08	2017-01-16 09:35:20	2017-01-16 09:35:20	1908	1840	kingdom	1	0.96	0	0	0	0.93	0.9	Not_Removed	Not_Removed	Not_Removed	Not_Removed
194	1679.29	Bifidobacterium	longum	subsp. longum	1679	1B	24	NA	PRJNA692178	SAMN17315587		JAESIO000000000	Feces	WGS	Illumina	2291707	59.9001	1939	1844	NA	0.935	Good	Human, Homo sapiens	1900-01-01	2021-02-01 08:11:18	2021-02-01 08:11:18	1879	1836	kingdom	1	0.98	0	0	0	0.94	0.92	Not_Removed	Not_Removed	Not_Removed	Not_Removed
195	1679.31	Bifidobacterium	longum	subsp. longum	1679	W11	22	NA	PRJNA356203	SAMN06109230	GCF_001940535.1	MRBG00000000	Intestine	WGS	Illumina	2329981	59.9	1992	1883	100	0.944	Good	Human, Homo sapiens	2017-01-09	2017-01-23 16:30:18	2017-01-23 16:30:18	1924	1860	kingdom	1	0.97	0	0	0	0.94	0.91	Not_Removed	Not_Removed	Not_Removed	Not_Removed
196	1679.45	Bifidobacterium	longum	subsp. longum	1679	DS32_3	28	NA	PRJNA336518	SAMN08949007	GCA_003094995.1	QDIY00000000	Others	WGS	Illumina	2235932	60.1402	1929	1885	100	0.935	Good	Human, Homo sapiens	2018-05-06	2018-05-27 22:36:31	2018-05-27 22:36:31	1841	1800	kingdom	1	0.98	0	0	0	0.95	0.92	Not_Removed	Not_Removed	Not_Removed	Not_Removed
197	1679.51	Bifidobacterium	longum	subsp. longum	1679	BORI	1	29747442	PRJNA481853	SAMN09691177	GCA_003342655.1	CP031133	Infants	Complete	PacBio	2311020	59.9386	1976	1915	100	0.944	Good	Human, Homo sapiens	2018-07-26	2018-09-30 00:50:55	2018-09-30 00:50:55	1853	1814	kingdom	1	0.98	0	0	0	0.94	0.92	Not_Removed	Not_Removed	Not_Removed	Not_Removed
198	1679.55	Bifidobacterium	longum	subsp. longum	1679	VKPM Ac-1636	73	NA	PRJNA511803	SAMN10644101	GCA_003990235.1	RZHL00000000	Intestine	WGS	Illumina	2321741	60.1945	2110	2023	NA	0.944	Good	Human, Homo sapiens	2019-01-01	2019-01-31 23:59:08	2019-01-31 23:59:08	2010	1930	kingdom	1	0.96	0	0	0	0.92	0.89	Not_Removed	Not_Removed	Not_Removed	Not_Removed
199	1679.6	Bifidobacterium	longum	subsp. longum	1679	LMG 13197	8	25085493	PRJNA239849	SAMN02673437	GCA_000741245.1	JGYZ00000000	Intestine	WGS	Ion Torrent	2384703	60.3	1986	1899	100	0.919	Good	Human, Homo sapiens	2014-08-18	2014-12-08 23:13:25	2015-03-16 03:17:09	1973	1830	kingdom	1	0.93	0	0	0	0.92	0.85	Not_Removed	Not_Removed	Not_Removed	Not_Removed
200	1679.7	Bifidobacterium	longum	subsp. longum	1679	VMKB44	34	NA	PRJNA263689	SAMN03105207	GCF_000786175.1	JRWN00000000	Feces	WGS	Illumina	2501933	60.28	2247	2030	100	0.935	Good	Human, Homo sapiens	2014-11-21	2016-01-17 15:41:05	2016-01-17 15:41:05	2161	1986	kingdom	1	0.92	0	0	0	0.91	0.83	Not_Removed	Not_Removed	Not_Removed	Not_Removed
201	1679.8	Bifidobacterium	longum	subsp. longum	1679	BLOI2	72	NA	PRJNA286998	SAMN03775040	GCF_001275745.1	LFDU00000000	Infant feces	WGS	Illumina	2417590	59.96	2120	2038	100	0.944	Good	Human, Homo sapiens	2015-08-31	2016-01-17 17:04:39	2016-01-17 17:04:39	2056	1982	kingdom	1	0.96	0	0	0	0.93	0.9	Not_Removed	Not_Removed	Not_Removed	Not_Removed
202	1679.88	Bifidobacterium	longum	subsp. longum	1679	C11A10B	53	30806428	PRJNA474590	SAMN09355370	GCA_004324325.1	QKOJ00000000	Infants	WGS	Illumina	2493030	60.1103	2291	2201	NA	0.943	Good	Human, Homo sapiens	2019-03-04	2019-07-18 03:01:18	2019-07-18 03:01:18	2172	2027	kingdom	1	0.93	0	0	0	0.91	0.85	Not_Removed	Not_Removed	Not_Removed	Not_Removed
203	1679.89	Bifidobacterium	longum	subsp. longum	1679	MCC10114	58	29311585	PRJNA374900	SAMN06368664	GCA_004332625.1	SHTD00000000	Feces	WGS	Illumina	2454594	59.818	2185	2057	NA	0.944	Good	Human, Homo sapiens	2019-03-08	2019-07-18 02:59:26	2019-07-18 02:59:26	2126	1992	kingdom	1	0.94	0	0	0	0.92	0.86	Not_Removed	Not_Removed	Not_Removed	Not_Removed
204	1679.9	Bifidobacterium	longum	subsp. longum	1679	NCIMB8809	1	26489930	PRJNA287223	SAMN03785818	GCF_001446255.1	CP011964	Feces	Complete	PacBio	2340989	60.11	2007	1856	100	0.944	Good	Human, Homo sapiens	2015-11-19	2016-01-17 17:48:43	2016-01-17 17:48:43	1931	1881	kingdom	1	0.97	0	0	0	0.94	0.91	Not_Removed	Not_Removed	Not_Removed	Not_Removed
205	1679.9	Bifidobacterium	longum	subsp. longum	1679	MCC10113	62	29311585	PRJNA374900	SAMN06368663	GCA_004332635.1	SHTC00000000	Feces	WGS	Illumina	2464113	60.0112	2188	2076	NA	0.895	Good	Human, Homo sapiens	2019-03-08	2019-07-18 03:00:18	2019-07-18 03:00:18	2153	2016	kingdom	1	0.94	0	0	0	0.92	0.86	Not_Removed	Not_Removed	Not_Removed	Not_Removed
206	1679.91	Bifidobacterium	longum	subsp. longum	1679	MCC10115	54	29311585	PRJNA374900	SAMN06368665	GCA_004332645.1	SHTE00000000	Feces	WGS	Illumina	2433724	60.2611	2204	2064	NA	0.935	Good	Human, Homo sapiens	2019-03-08	2019-07-18 03:00:41	2019-07-18 03:00:41	2133	2022	kingdom	1	0.95	0	0	0	0.92	0.87	Not_Removed	Not_Removed	Not_Removed	Not_Removed
207	1679.92	Bifidobacterium	longum	subsp. longum	1679	MCC10111	49	29311585	PRJNA374900	SAMN06368661	GCA_004332655.1	SHTA00000000	Feces	WGS	Illumina	2438263	60.0174	2164	2066	NA	0.935	Good	Human, Homo sapiens	2019-03-08	2019-07-18 03:02:49	2019-07-18 03:02:49	2122	1988	kingdom	1	0.94	0	0	0	0.92	0.86	Not_Removed	Not_Removed	Not_Removed	Not_Removed
208	1679.93	Bifidobacterium	longum	subsp. longum	1679	MCC10108	73	29311585	PRJNA374900	SAMN06368660	GCA_004332665.1	SHSZ00000000	Feces	WGS	Illumina	2418752	60.2548	2163	2011	NA	0.927	Good	Human, Homo sapiens	2019-03-08	2019-07-18 03:03:16	2019-07-18 03:03:16	2091	2009	kingdom	1	0.96	0	0	0	0.92	0.89	Not_Removed	Not_Removed	Not_Removed	Not_Removed
209	1679.94	Bifidobacterium	longum	subsp. longum	1679	MCC10101	65	29311585	PRJNA374900	SAMN06368655	GCA_004332725.1	SHSU00000000	Feces	WGS	Illumina	2418061	60.076	2141	1989	NA	0.944	Good	Human, Homo sapiens	2019-03-08	2019-07-18 03:01:40	2019-07-18 03:01:40	2069	1995	kingdom	1	0.96	0	0	0	0.93	0.9	Not_Removed	Not_Removed	Not_Removed	Not_Removed
210	1679.95	Bifidobacterium	longum	subsp. longum	1679	MCC10106	74	29311585	PRJNA374900	SAMN06368658	GCA_004332735.1	SHSX00000000	Feces	WGS	Illumina	2415027	60.1212	2126	1999	NA	0.952	Good	Human, Homo sapiens	2019-03-08	2019-07-18 03:01:49	2019-07-18 03:01:49	2077	1997	kingdom	1	0.96	0	0	0	0.93	0.89	Not_Removed	Not_Removed	Not_Removed	Not_Removed
211	1679.96	Bifidobacterium	longum	subsp. longum	1679	MCC10099	66	29311585	PRJNA374900	SAMN06368653	GCA_004332745.1	SHSS00000000	Feces	WGS	Illumina	2340071	60.0833	2032	1906	NA	0.935	Good	Human, Homo sapiens	2019-03-08	2019-07-18 03:01:47	2019-07-18 03:01:47	1960	1914	kingdom	1	0.98	0	0	0	0.95	0.92	Not_Removed	Not_Removed	Not_Removed	Not_Removed
212	1679.97	Bifidobacterium	longum	subsp. longum	1679	MCC10102	56	29311585	PRJNA374900	SAMN06368656	GCA_004332755.1	SHSV00000000	Feces	WGS	Illumina	2538754	60.0811	2272	2137	NA	0.935	Good	Human, Homo sapiens	2019-03-08	2019-07-18 03:02:28	2019-07-18 03:02:28	2188	2076	kingdom	1	0.95	0	0	0	0.91	0.86	Not_Removed	Not_Removed	Not_Removed	Not_Removed
213	1679.98	Bifidobacterium	longum	subsp. longum	1679	MCC10107	45	29311585	PRJNA374900	SAMN06368659	GCA_004332765.1	SHSY00000000	Feces	WGS	Illumina	2384750	59.7673	2092	1970	NA	0.935	Good	Human, Homo sapiens	2019-03-08	2019-07-18 03:03:09	2019-07-18 03:03:09	2026	1915	kingdom	1	0.94	0	0	0	0.92	0.87	Not_Removed	Not_Removed	Not_Removed	Not_Removed
214	1679.99	Bifidobacterium	longum	subsp. longum	1679	MCC10097	52	29311585	PRJNA374900	SAMN06368651	GCA_004332825.1	SHSQ00000000	Feces	WGS	Illumina	2280351	60.0335	1959	1851	NA	0.927	Good	Human, Homo sapiens	2019-03-08	2019-07-18 03:05:19	2019-07-18 03:05:19	1915	1849	kingdom	1	0.97	0	0	0	0.94	0.91	Not_Removed	Not_Removed	Not_Removed	Not_Removed
215	1680.104	Bifidobacterium	adolescentis	NA	1680	1-11	1	NA	PRJNA445212	SAMN08770276	GCA_003030905.1	CP028341	Infant feces	Complete	Illumina	2192428	59.5838	1904	1793	100	0.968	Good	Human, Homo sapiens	2018-04-03	2018-05-30 23:01:16	2018-05-30 23:01:16	1816	1740	kingdom	1	0.96	0	0	0	0.93	0.89	Not_Removed	Not_Removed	Not_Removed	Not_Removed
216	1680.142	Bifidobacterium	adolescentis	NA	1680	6	1	NA	PRJNA399823	SAMN07551488	GCA_003429385.1	CP023005	Adult feces	Complete	PacBio	2201808	59.2873	1874	1770	100	0.968	Good	Human, Homo sapiens	2018-08-28	2018-10-01 23:42:34	2018-10-01 23:42:34	1787	1713	kingdom	1	0.96	0	0	0	0.93	0.89	Not_Removed	Not_Removed	Not_Removed	Not_Removed
217	1680.143	Bifidobacterium	adolescentis	NA	1680	TM06-4	13	NA	PRJNA482748	SAMN09736994	GCA_003436185.1	QSPC00000000	Feces	WGS	Illumina	2150377	59.1384	1834	1729	100	0.968	Good	Human, Homo sapiens	2018-08-31	2018-10-02 04:00:15	2018-10-02 04:00:15	1733	1679	kingdom	1	0.97	0	0	0	0.94	0.91	Not_Removed	Not_Removed	Not_Removed	Not_Removed
218	1680.144	Bifidobacterium	adolescentis	NA	1680	TF06-2AC	22	NA	PRJNA482748	SAMN09736894	GCA_003437735.1	QSSB00000000	Feces	WGS	Illumina	2265719	59.5782	2021	1905	100	0.968	Good	Human, Homo sapiens	2018-08-31	2018-10-02 04:36:52	2018-10-02 04:36:52	1918	1782	kingdom	1	0.93	0	0	0	0.92	0.86	Not_Removed	Not_Removed	Not_Removed	Not_Removed
219	1680.145	Bifidobacterium	adolescentis	NA	1680	TF06-29	23	NA	PRJNA482748	SAMN09736893	GCA_003437755.1	QSSC00000000	Feces	WGS	Illumina	2163523	59.2096	1896	1800	100	0.968	Good	Human, Homo sapiens	2018-08-31	2018-10-02 04:36:50	2018-10-02 04:36:50	1800	1736	kingdom	1	0.96	0	0	0	0.94	0.9	Not_Removed	Not_Removed	Not_Removed	Not_Removed
220	1680.146	Bifidobacterium	adolescentis	NA	1680	TF06-10AC	23	NA	PRJNA482748	SAMN09736887	GCA_003437775.1	QSSG00000000	Feces	WGS	Illumina	2162486	59.2114	1899	1793	100	0.968	Good	Human, Homo sapiens	2018-08-31	2018-10-02 04:36:57	2018-10-02 04:36:57	1808	1741	kingdom	1	0.96	0	0	0	0.93	0.9	Not_Removed	Not_Removed	Not_Removed	Not_Removed
221	1680.147	Bifidobacterium	adolescentis	NA	1680	AF28-4AC	16	NA	PRJNA482748	SAMN09734547	GCA_003457765.1	QRTB00000000	Feces	WGS	Illumina	2141977	59.2336	1843	1742	100	0.968	Good	Human, Homo sapiens	2018-09-05	2018-10-02 09:10:33	2018-10-02 09:10:33	1746	1694	kingdom	1	0.97	0	0	0	0.94	0.91	Not_Removed	Not_Removed	Not_Removed	Not_Removed
222	1680.148	Bifidobacterium	adolescentis	NA	1680	AF21-27	25	NA	PRJNA482748	SAMN09734426	GCA_003458805.1	QRVT00000000	Feces	WGS	Illumina	2277840	59.4196	2027	1892	100	0.968	Good	Human, Homo sapiens	2018-09-05	2018-10-02 09:29:16	2018-10-02 09:29:16	1922	1833	kingdom	1	0.95	0	0	0	0.91	0.87	Not_Removed	Not_Removed	Not_Removed	Not_Removed
223	1680.149	Bifidobacterium	adolescentis	NA	1680	OF04-5	16	NA	PRJNA482748	SAMN09736710	GCA_003462885.1	QSCA00000000	Feces	WGS	Illumina	2141917	59.2351	1842	1739	100	0.968	Good	Human, Homo sapiens	2018-09-06	2018-10-02 10:25:44	2018-10-02 10:25:44	1749	1696	kingdom	1	0.97	0	0	0	0.94	0.91	Not_Removed	Not_Removed	Not_Removed	Not_Removed
224	1680.15	Bifidobacterium	adolescentis	NA	1680	OF04-9AC	19	NA	PRJNA482748	SAMN09736711	GCA_003462895.1	QSBZ00000000	Feces	WGS	Illumina	2142182	59.2339	1850	1742	100	0.968	Good	Human, Homo sapiens	2018-09-06	2018-10-02 10:26:21	2018-10-02 10:26:21	1752	1698	kingdom	1	0.97	0	0	0	0.94	0.91	Not_Removed	Not_Removed	Not_Removed	Not_Removed
225	1680.151	Bifidobacterium	adolescentis	NA	1680	AF15-3	12	NA	PRJNA482748	SAMN09734284	GCA_003464325.1	QRYO00000000	Feces	WGS	Illumina	2197116	59.446	1873	1776	100	0.968	Good	Human, Homo sapiens	2018-09-06	2018-10-02 10:55:21	2018-10-02 10:55:21	1780	1726	kingdom	1	0.97	0	0	0	0.94	0.91	Not_Removed	Not_Removed	Not_Removed	Not_Removed
226	1680.152	Bifidobacterium	adolescentis	NA	1680	AF14-56	25	NA	PRJNA482748	SAMN09734269	GCA_003465205.1	QRYX00000000	Feces	WGS	Illumina	2256986	59.4513	1999	1872	100	0.96	Good	Human, Homo sapiens	2018-09-06	2018-10-02 11:10:28	2018-10-02 11:10:28	1893	1807	kingdom	1	0.95	0	0	0	0.92	0.87	Not_Removed	Not_Removed	Not_Removed	Not_Removed
227	1680.153	Bifidobacterium	adolescentis	NA	1680	TM06-51	26	NA	PRJNA482748	SAMN09736997	GCA_003466335.1	QSOZ00000000	Feces	WGS	Illumina	2225243	59.1663	1937	1828	100	0.968	Good	Human, Homo sapiens	2018-08-31	2018-10-02 11:24:50	2018-10-02 11:24:50	1848	1759	kingdom	1	0.95	0	0	0	0.92	0.88	Not_Removed	Not_Removed	Not_Removed	Not_Removed
228	1680.154	Bifidobacterium	adolescentis	NA	1680	AM41-17	20	NA	PRJNA482748	SAMN09736531	GCA_003467335.1	QSGI00000000	Feces	WGS	Illumina	2094567	59.1797	1775	1678	100	0.968	Good	Human, Homo sapiens	2018-09-06	2018-10-02 11:42:50	2018-10-02 11:42:50	1685	1646	kingdom	1	0.98	0	0	0	0.94	0.92	Not_Removed	Not_Removed	Not_Removed	Not_Removed
229	1680.155	Bifidobacterium	adolescentis	NA	1680	AM36-3AC	16	NA	PRJNA482748	SAMN09736483	GCA_003468385.1	QSHT00000000	Feces	WGS	Illumina	2215465	59.2111	1906	1805	100	0.968	Good	Human, Homo sapiens	2018-09-06	2018-10-02 11:57:02	2018-10-02 11:57:02	1799	1732	kingdom	1	0.96	0	0	0	0.93	0.9	Not_Removed	Not_Removed	Not_Removed	Not_Removed
230	1680.156	Bifidobacterium	adolescentis	NA	1680	AM34-11	16	NA	PRJNA482748	SAMN09736459	GCA_003469145.1	QSIK00000000	Feces	WGS	Illumina	2173388	59.2531	1851	1749	100	0.968	Good	Human, Homo sapiens	2018-09-06	2018-10-02 12:13:15	2018-10-02 12:13:15	1755	1677	kingdom	1	0.95	0	0	0	0.93	0.89	Not_Removed	Not_Removed	Not_Removed	Not_Removed
231	1680.157	Bifidobacterium	adolescentis	NA	1680	AM14-37	12	NA	PRJNA482748	SAMN09734811	GCA_003472095.1	QRKU00000000	Feces	WGS	Illumina	2193162	59.1355	1880	1778	100	0.968	Good	Human, Homo sapiens	2018-09-06	2018-10-02 14:58:35	2018-10-02 14:58:35	1783	1732	kingdom	1	0.97	0	0	0	0.93	0.9	Not_Removed	Not_Removed	Not_Removed	Not_Removed
232	1680.158	Bifidobacterium	adolescentis	NA	1680	AM12-59	64	NA	PRJNA482748	SAMN09734791	GCA_003472245.1	QRLL00000000	Feces	WGS	Illumina	2288825	59.1974	2014	1891	100	0.968	Good	Human, Homo sapiens	2018-09-06	2018-10-02 15:03:24	2018-10-02 15:03:24	1913	1797	kingdom	1	0.94	0	0	0	0.92	0.86	Not_Removed	Not_Removed	Not_Removed	Not_Removed
233	1680.159	Bifidobacterium	adolescentis	NA	1680	AM12-20	25	NA	PRJNA482748	SAMN09734786	GCA_003472265.1	QRLP00000000	Feces	WGS	Illumina	2293869	59.2952	1994	1870	100	0.968	Good	Human, Homo sapiens	2018-09-06	2018-10-02 15:03:01	2018-10-02 15:03:01	1895	1802	kingdom	1	0.95	0	0	0	0.92	0.88	Not_Removed	Not_Removed	Not_Removed	Not_Removed
234	1680.16	Bifidobacterium	adolescentis	NA	1680	AM13-11	15	NA	PRJNA482748	SAMN09734794	GCA_003473105.1	QRLI00000000	Feces	WGS	Illumina	2263245	59.4135	2036	1914	100	0.968	Good	Human, Homo sapiens	2018-09-06	2018-10-02 15:20:52	2018-10-02 15:20:52	1934	1821	kingdom	1	0.94	0	0	0	0.91	0.86	Not_Removed	Not_Removed	Not_Removed	Not_Removed
235	1680.1826	Bifidobacterium	adolescentis	NA	1680	Km 4	45	NA	PRJNA327473	SAMN05300513	GCA_001756865.1	MAXD00000000	Feces	WGS	Roche 454	2424972	59.7642	2168	1998	NA	0.968	Good	Human, Homo sapiens	2016-10-11	2019-07-16 17:30:25	2019-07-16 17:30:25	2063	1820	kingdom	1	0.88	0	0	0	0.91	0.8	Not_Removed	Not_Removed	Not_Removed	Not_Removed
236	1680.1827	Bifidobacterium	adolescentis	NA	1680	ca_0067	13	30630933	PRJNA496358	SAMN10239583	GCA_004167585.1	RCXE00000000	Feces	WGS	Illumina	2149199	59.4973	1866	1749	NA	0.968	Good	Human, Homo sapiens	2019-02-11	2019-07-16 17:30:16	2019-07-16 17:30:16	1759	1700	kingdom	1	0.97	0	0	0	0.94	0.9	Not_Removed	Not_Removed	Not_Removed	Not_Removed
237	1680.1828	Bifidobacterium	adolescentis	NA	1680	1001271st1_A4	25	NA	PRJNA518912	SAMN10863259	GCA_005845205.1	SPGC00000000	Feces	WGS	Illumina	2251529	59.264	1980	NA	NA	0.968	Good	Human, Homo sapiens	2019-05-26	2019-07-16 17:32:25	2019-07-16 17:32:25	1908	1800	kingdom	1	0.94	0	0	0	0.91	0.86	Not_Removed	Not_Removed	Not_Removed	Not_Removed
238	1680.1894	Bifidobacterium	adolescentis	NA	1680	S03C.meta.bin_8	34	31384000	PRJNA492716	SAMN10316532	GCA_008672795.1	RPVS00000000	Feces	WGS	Illumina	2140370	59.5663	1862	NA	NA	0.96	Good	Human, Homo sapiens	2019-09-23	2019-10-02 14:39:30	2019-10-02 14:39:30	1794	1722	kingdom	1	0.96	0	0	0	0.93	0.89	Not_Removed	Not_Removed	Not_Removed	Not_Removed
239	1680.1895	Bifidobacterium	adolescentis	NA	1680	S03B.meta.bin_6	29	31384000	PRJNA492716	SAMN10316521	GCA_008673035.1	RPVH00000000	Feces	WGS	Illumina	2144860	59.5721	1854	NA	NA	0.96	Good	Human, Homo sapiens	2019-09-23	2019-10-02 14:42:19	2019-10-02 14:42:19	1794	1718	kingdom	1	0.96	0	0	0	0.93	0.89	Not_Removed	Not_Removed	Not_Removed	Not_Removed
240	1680.1896	Bifidobacterium	adolescentis	NA	1680	S03A.meta.bin_7	27	31384000	PRJNA492716	SAMN10316511	GCA_008673205.1	RPUX00000000	Feces	WGS	Illumina	2072318	59.6561	1799	NA	NA	0.96	Good	Human, Homo sapiens	2019-09-23	2019-10-02 14:43:22	2019-10-02 14:43:22	1729	1671	kingdom	1	0.97	0	0	0	0.94	0.9	Not_Removed	Not_Removed	Not_Removed	Not_Removed
241	1680.1897	Bifidobacterium	adolescentis	NA	1680	LMAG:101	1	31455406	PRJNA362284	SAMN06546905	GCA_008679245.1	NANO00000000	Feces	WGS	PacBio	2179748	59.5221	1817	NA	NA	0.968	Good	Human, Homo sapiens	2019-09-23	2019-10-02 14:59:49	2019-10-02 14:59:49	1761	1695	kingdom	1	0.96	0	0	0	0.94	0.9	Not_Removed	Not_Removed	Not_Removed	Not_Removed
242	1680.1898	Bifidobacterium	adolescentis	NA	1680	LMAG:23	8	31455406	PRJNA362284	SAMN06546827	GCA_008680775.1	NAKO00000000	Feces	WGS	PacBio	2263328	59.5196	2010	NA	NA	0.952	Good	Human, Homo sapiens	2019-09-23	2019-10-02 15:21:32	2019-10-02 15:21:32	1895	1816	kingdom	1	0.96	0	0	0	0.93	0.89	Not_Removed	Not_Removed	Not_Removed	Not_Removed
243	1680.1909	Bifidobacterium	adolescentis	NA	1680	ZJ2	1	NA	PRJNA565810	SAMN12769615	GCA_009832825.1	CP047129	NA	Complete	PacBio	2401766	59.9071	2104	1982	NA	0.968	Good	Human, Homo sapiens	2020-01-07	2020-02-07 13:50:54	2020-02-07 13:50:54	2010	1802	kingdom	1	0.9	0	0	0	0.91	0.81	Not_Removed	Not_Removed	Not_Removed	Not_Removed
244	1680.1978	Bifidobacterium	adolescentis	NA	1680	BIO5485	11	NA	PRJNA574342	SAMN14848232		JABRBW000000000	Intestine	WGS	Illumina	2063860	59.172	1781	1651	NA	0.968	Good	Human, Homo sapiens	2020-06-02	2020-07-01 03:11:10	2020-07-01 03:11:10	1681	1644	kingdom	1	0.98	0	0	0	0.97	0.95	Not_Removed	Not_Removed	Not_Removed	Not_Removed
245	1680.2026	Bifidobacterium	adolescentis	NA	1680	HD17T2H	12	32839473	PRJNA628660	SAMN14738162		JABEZS000000000	Feces	WGS	Illumina	2163875	59.2338	1854	1753	NA	0.968	Good	Human, Homo sapiens	1900-01-01	2020-11-28 10:54:42	2020-11-28 10:54:42	1784	1723	kingdom	1	0.97	0	0	0	0.94	0.91	Not_Removed	Not_Removed	Not_Removed	Not_Removed
246	1680.2027	Bifidobacterium	adolescentis	NA	1680	COPD007	108	NA	PRJNA562766	SAMN12904954	GCA_014871755.1	WGSG00000000	Feces	WGS	Illumina	2041180	59.5656	1782	NA	NA	0.79	Good	Human, Homo sapiens	2020-10-08	2020-11-29 14:02:57	2020-11-29 14:02:57	1716	1656	kingdom	1	0.97	0	0	0	0.95	0.91	Not_Removed	Not_Removed	Not_Removed	Not_Removed
247	1680.2028	Bifidobacterium	adolescentis	NA	1680	BSD2780061688_150302_F11	11	NA	PRJNA637878	SAMN15532549		JADMVX000000000	Feces	WGS	Illumina	2423595	59.873	2205	NA	NA	0.968	Good	Human, Homo sapiens	2020-11-17	2020-11-30 15:10:25	2020-11-30 15:10:25	2113	1839	kingdom	1	0.87	0	0	0	0.9	0.79	Not_Removed	Not_Removed	Not_Removed	Not_Removed
248	1680.2029	Bifidobacterium	adolescentis	NA	1680	1001270B_150601_E2	12	NA	PRJNA637878	SAMN15532384		JADMXJ000000000	Feces	WGS	Illumina	2222729	59.4054	1908	NA	NA	0.968	Good	Human, Homo sapiens	2020-11-17	2020-11-30 15:16:25	2020-11-30 15:16:25	1830	1737	kingdom	1	0.95	0	0	0	0.92	0.87	Not_Removed	Not_Removed	Not_Removed	Not_Removed
249	1680.203	Bifidobacterium	adolescentis	NA	1680	1001271B_150615_A4	25	NA	PRJNA637878	SAMN15532382		JADMXN010000010,JADMXN010000011,JADMXN010000012,JADMXN010000013,JADMXN010000014,JADMXN010000015,JADMXN010000016	Feces	WGS	Illumina	2251529	59.264	1980	NA	NA	0.968	Good	Human, Homo sapiens	2020-11-17	2020-11-30 15:16:11	2020-11-30 15:16:11	1908	1800	kingdom	1	0.94	0	0	0	0.91	0.86	Not_Removed	Not_Removed	Not_Removed	Not_Removed
250	1680.2031	Bifidobacterium	adolescentis	NA	1680	1001095IJ_161003_D1	96	NA	PRJNA637878	SAMN15532789		JADMYC010000010,JADMYC010000011,JADMYC010000012,JADMYC010000013,JADMYC010000014,JADMYC010000015,JADMYC010000016	Feces	WGS	Illumina	2398860	59.1787	2122	NA	NA	0.968	Good	Human, Homo sapiens	2020-11-17	2020-11-30 15:22:22	2020-11-30 15:22:22	2035	1917	kingdom	1	0.94	0	0	0	0.92	0.87	Not_Removed	Not_Removed	Not_Removed	Not_Removed
251	1680.2032	Bifidobacterium	adolescentis	NA	1680	D31t1_170403_E3	9	NA	PRJNA637878	SAMN15532746		JADMZS000000000	Feces	WGS	Illumina	2336406	59.3241	2018	NA	NA	0.968	Good	Human, Homo sapiens	2020-11-17	2020-11-30 15:27:48	2020-11-30 15:27:48	1936	1832	kingdom	1	0.95	0	0	0	0.92	0.87	Not_Removed	Not_Removed	Not_Removed	Not_Removed
252	1680.2033	Bifidobacterium	adolescentis	NA	1680	D53t1_180928_D4	21	NA	PRJNA637878	SAMN15532437		JADNFK010000010,JADNFK010000011,JADNFK010000012,JADNFK010000013,JADNFK010000014,JADNFK010000015,JADNFK010000016	Feces	WGS	Illumina	2165327	59.6773	1827	NA	NA	0.968	Good	Human, Homo sapiens	2020-11-17	2020-11-30 15:49:59	2020-11-30 15:49:59	1770	1712	kingdom	1	0.97	0	0	0	0.93	0.9	Not_Removed	Not_Removed	Not_Removed	Not_Removed
253	1680.2034	Bifidobacterium	adolescentis	NA	1680	BSD2780061687_150420_A4	11	NA	PRJNA637878	SAMN15532612		JADNHO000000000	Feces	WGS	Illumina	2281113	59.2753	1939	NA	NA	0.968	Good	Human, Homo sapiens	2020-11-17	2020-11-30 15:54:51	2020-11-30 15:54:51	1859	1770	kingdom	1	0.95	0	0	0	0.93	0.88	Not_Removed	Not_Removed	Not_Removed	Not_Removed
254	1680.2035	Bifidobacterium	adolescentis	NA	1680	1001095IJ_161003_A7	20	NA	PRJNA637878	SAMN15532611		JADNHP010000010,JADNHP010000011,JADNHP010000012,JADNHP010000013,JADNHP010000014,JADNHP010000015,JADNHP010000016	Feces	WGS	Illumina	2283316	59.2825	1972	NA	NA	0.968	Good	Human, Homo sapiens	2020-11-17	2020-11-30 15:54:47	2020-11-30 15:54:47	1887	1779	kingdom	1	0.94	0	0	0	0.92	0.87	Not_Removed	Not_Removed	Not_Removed	Not_Removed
255	1680.2036	Bifidobacterium	adolescentis	NA	1680	BSD2780061687b_171204_D1	14	NA	PRJNA637878	SAMN15533150		JADNHJ000000000	Feces	WGS	Illumina	2259392	59.386	1943	NA	NA	0.968	Good	Human, Homo sapiens	2020-11-17	2020-11-30 15:56:17	2020-11-30 15:56:17	1864	1786	kingdom	1	0.96	0	0	0	0.92	0.88	Not_Removed	Not_Removed	Not_Removed	Not_Removed
256	1680.2037	Bifidobacterium	adolescentis	NA	1680	1001099B_141217_F6	45	NA	PRJNA637878	SAMN15533211		JADNID010000035,JADNID010000036,JADNID010000037,JADNID010000038,JADNID010000039,JADNID010000040,JADNID010000041	Feces	WGS	Illumina	2169011	59.3538	1836	NA	NA	0.968	Good	Human, Homo sapiens	2020-11-17	2020-11-30 15:58:52	2020-11-30 15:58:52	1773	1710	kingdom	1	0.96	0	0	0	0.94	0.91	Not_Removed	Not_Removed	Not_Removed	Not_Removed
257	1680.2038	Bifidobacterium	adolescentis	NA	1680	D59t2_181005_G7	14	NA	PRJNA637878	SAMN15532393		JADNKQ000000000	Feces	WGS	Illumina	2174863	59.6192	1819	NA	NA	0.968	Good	Human, Homo sapiens	2020-11-17	2020-11-30 16:13:21	2020-11-30 16:13:21	1769	1709	kingdom	1	0.97	0	0	0	0.93	0.9	Not_Removed	Not_Removed	Not_Removed	Not_Removed
258	1680.2039	Bifidobacterium	adolescentis	NA	1680	1001283B150304_161114_G1	13	NA	PRJNA637878	SAMN15532697		JADNOQ000000000	Feces	WGS	Illumina	2099395	59.2748	1753	NA	NA	0.968	Good	Human, Homo sapiens	2020-11-17	2020-11-30 16:30:59	2020-11-30 16:30:59	1688	1652	kingdom	1	0.98	0	0	0	0.95	0.93	Not_Removed	Not_Removed	Not_Removed	Not_Removed
259	1680.204	Bifidobacterium	adolescentis	NA	1680	1001262B_160229_D10	11	NA	PRJNA637878	SAMN15532752		JADNOT000000000	Feces	WGS	Illumina	2139956	59.1747	1823	NA	NA	0.968	Good	Human, Homo sapiens	2020-11-17	2020-11-30 16:31:03	2020-11-30 16:31:03	1736	1683	kingdom	1	0.97	0	0	0	0.93	0.91	Not_Removed	Not_Removed	Not_Removed	Not_Removed
260	1680.2041	Bifidobacterium	adolescentis	NA	1680	BSD2780120874b_170522_D7	13	NA	PRJNA637878	SAMN15532365		JADNPN000000000	Feces	WGS	Illumina	2161087	59.4328	1850	NA	NA	0.968	Good	Human, Homo sapiens	2020-11-17	2020-11-30 16:34:59	2020-11-30 16:34:59	1760	1716	kingdom	1	0.98	0	0	0	0.95	0.92	Not_Removed	Not_Removed	Not_Removed	Not_Removed
261	1680.2042	Bifidobacterium	adolescentis	NA	1680	D52t1_170925_B8	13	NA	PRJNA637878	SAMN15532600		JADMNZ000000000	Feces	WGS	Illumina	2134526	59.5088	1815	NA	NA	0.96	Good	Human, Homo sapiens	2020-11-17	2020-11-30 16:35:58	2020-11-30 16:35:58	1748	1665	kingdom	1	0.95	0	0	0	0.94	0.89	Not_Removed	Not_Removed	Not_Removed	Not_Removed
262	1680.2043	Bifidobacterium	adolescentis	NA	1680	D46t1_190503_C9	13	NA	PRJNA637878	SAMN15532606		JADMOF000000000	Feces	WGS	Illumina	2169879	59.404	1856	NA	NA	0.968	Good	Human, Homo sapiens	2020-11-17	2020-11-30 16:38:42	2020-11-30 16:38:42	1791	1713	kingdom	1	0.96	0	0	0	0.93	0.89	Not_Removed	Not_Removed	Not_Removed	Not_Removed
263	1680.2044	Bifidobacterium	adolescentis	NA	1680	1001275B_160808_D1	26	NA	PRJNA637878	SAMN15532607		JADMOG010000010,JADMOG010000011,JADMOG010000012,JADMOG010000013,JADMOG010000014,JADMOG010000015,JADMOG010000016	Feces	WGS	Illumina	2367927	59.3298	2074	NA	NA	0.968	Good	Human, Homo sapiens	2020-11-17	2020-11-30 16:38:43	2020-11-30 16:38:43	1990	1888	kingdom	1	0.95	0	0	0	0.91	0.86	Not_Removed	Not_Removed	Not_Removed	Not_Removed
264	1680.2045	Bifidobacterium	adolescentis	NA	1680	1001713B170214_170313_A6	12	NA	PRJNA637878	SAMN15533187		JADMOO000000000	Feces	WGS	Illumina	2270282	59.4999	1979	NA	NA	0.968	Good	Human, Homo sapiens	2020-11-17	2020-11-30 16:40:49	2020-11-30 16:40:49	1915	1804	kingdom	1	0.94	0	0	0	0.93	0.87	Not_Removed	Not_Removed	Not_Removed	Not_Removed
265	1680.2046	Bifidobacterium	adolescentis	NA	1680	D52t1_170925_G1	16	NA	PRJNA637878	SAMN15533350		JADMPZ010000010,JADMPZ010000011,JADMPZ010000012,JADMPZ010000013,JADMPZ010000014,JADMPZ010000015,JADMPZ010000016	Feces	WGS	Illumina	2223151	59.3921	1882	NA	NA	0.96	Good	Human, Homo sapiens	2020-11-17	2020-11-30 16:47:19	2020-11-30 16:47:19	1795	1705	kingdom	1	0.95	0	0	0	0.93	0.89	Not_Removed	Not_Removed	Not_Removed	Not_Removed
266	1680.2047	Bifidobacterium	adolescentis	NA	1680	1001270J_160509_E8	16	NA	PRJNA637878	SAMN15532794		JADMRD010000010,JADMRD010000011,JADMRD010000012,JADMRD010000013,JADMRD010000014,JADMRD010000015,JADMRD010000016	Feces	WGS	Illumina	2265784	59.319	1925	NA	NA	0.968	Good	Human, Homo sapiens	2020-11-17	2020-11-30 16:54:07	2020-11-30 16:54:07	1855	1801	kingdom	1	0.97	0	0	0	0.93	0.9	Not_Removed	Not_Removed	Not_Removed	Not_Removed
267	1680.205	Bifidobacterium	adolescentis	NA	1680	VKPM Ac-1245	12	NA	PRJNA656137	SAMN15880059		JACTOC000000000	Feces	WGS	Illumina	2218534	59.2679	1971	1857	NA	0.968	Good	Human, Homo sapiens	2020-12-15	2021-01-01 19:45:08	2021-01-01 19:45:08	1893	1795	kingdom	1	0.95	0	0	0	0.92	0.87	Not_Removed	Not_Removed	Not_Removed	Not_Removed
268	1680.34	Bifidobacterium	adolescentis	NA	1680	1892B	11	NA	PRJNA379831	SAMN06621712	GCA_002075965.1	NAQF00000000	Infant feces	WGS	Unknown	2150850	59.35	1824	1720	99.4	0.968	Good	Human, Homo sapiens	2017-03-31	2017-05-28 06:04:55	2017-05-28 06:04:55	1746	1700	kingdom	1	0.97	0	0	0	0.94	0.92	Not_Removed	Not_Removed	Not_Removed	Not_Removed
269	1680.35	Bifidobacterium	adolescentis	NA	1680	42B	15	27035119	PRJNA300965	SAMN04231308	GCA_002107925.1	LNKB00000000	Feces	WGS	Illumina	2212742	59.17	1939	1855	100	0.96	Good	Human, Homo sapiens	2017-04-24	2017-05-29 03:20:17	2017-05-29 03:20:17	1863	1779	kingdom	1	0.95	0	0	0	0.92	0.88	Not_Removed	Not_Removed	Not_Removed	Not_Removed
270	1680.36	Bifidobacterium	adolescentis	NA	1680	70B	14	27035119	PRJNA300965	SAMN04231309	GCA_002107955.1	LNKC00000000	Feces	WGS	Illumina	2212129	58.76	1905	1774	100	0.968	Good	Human, Homo sapiens	2017-04-24	2017-05-29 03:21:06	2017-05-29 03:21:06	1802	1737	kingdom	1	0.96	0	0	0	0.93	0.9	Not_Removed	Not_Removed	Not_Removed	Not_Removed
271	1680.37	Bifidobacterium	adolescentis	NA	1680	AL12-4	8	27035119	PRJNA300965	SAMN04231313	GCA_002107975.1	LNKG00000000	Feces	WGS	Illumina	2094907	59.38	1777	1666	100	0.968	Good	Human, Homo sapiens	2017-04-24	2017-05-29 03:22:49	2017-05-29 03:22:49	1701	1658	kingdom	1	0.97	0	0	0	0.95	0.92	Not_Removed	Not_Removed	Not_Removed	Not_Removed
272	1680.38	Bifidobacterium	adolescentis	NA	1680	LMG 10734	20	27035119	PRJNA300965	SAMN04231317	GCA_002107995.1	LNKK00000000	Intestine	WGS	Ion Torrent	2148629	59.19	1797	1653	100	0.968	Good	Human, Homo sapiens	2017-04-24	2017-05-29 03:20:05	2017-05-29 03:20:05	1723	1675	kingdom	1	0.97	0	0	0	0.94	0.92	Not_Removed	Not_Removed	Not_Removed	Not_Removed
273	1680.39	Bifidobacterium	adolescentis	NA	1680	487B	11	27035119	PRJNA300965	SAMN04231310	GCA_002108015.1	LNKD00000000	Feces	WGS	Illumina	2597776	59.06	2363	2215	100	0.96	Good	Human, Homo sapiens	2017-04-24	2017-05-29 03:27:37	2017-05-29 03:27:37	2248	1994	kingdom	1	0.89	0	0	0	0.9	0.8	Not_Removed	Not_Removed	Not_Removed	Not_Removed
274	1680.4	Bifidobacterium	adolescentis	NA	1680	22L	1	25063659	PRJNA240293	SAMN02673695	GCA_000737885.1	CP007443.1	Milk	Complete	Ion Torrent	2203222	59.3	1820	1725	100	0.968	Good	Human, Homo sapiens	2014-08-05	2014-12-08 23:13:25	2015-03-16 03:17:09	1770	1706	kingdom	1	0.96	0	0	0	0.93	0.9	Not_Removed	Not_Removed	Not_Removed	Not_Removed
275	1680.4	Bifidobacterium	adolescentis	NA	1680	AD2-8	26	27035119	PRJNA300965	SAMN04231312	GCA_002108045.1	LNKF00000000	Feces	WGS	Illumina	2379716	59.94	2136	2029	100	0.968	Good	Human, Homo sapiens	2017-04-24	2017-05-29 03:24:43	2017-05-29 03:24:43	2044	1811	kingdom	1	0.89	0	0	0	0.91	0.81	Not_Removed	Not_Removed	Not_Removed	Not_Removed
276	1680.41	Bifidobacterium	adolescentis	NA	1680	703B	33	27035119	PRJNA300965	SAMN04231311	GCA_002108035.1	LNKE00000000	Feces	WGS	Illumina	2372808	59.32	2169	2044	100	0.968	Good	Human, Homo sapiens	2017-04-24	2017-05-29 03:33:30	2017-05-29 03:33:30	2090	1896	kingdom	1	0.91	0	0	0	0.9	0.82	Not_Removed	Not_Removed	Not_Removed	Not_Removed
277	1680.42	Bifidobacterium	adolescentis	NA	1680	AL46-2	17	27035119	PRJNA300965	SAMN04231314	GCA_002108075.1	LNKH00000000	Feces	WGS	Illumina	2208560	59.54	1865	1769	100	0.968	Good	Human, Homo sapiens	2017-04-24	2017-05-29 03:24:59	2017-05-29 03:24:59	1800	1740	kingdom	1	0.97	0	0	0	0.93	0.9	Not_Removed	Not_Removed	Not_Removed	Not_Removed
278	1680.43	Bifidobacterium	adolescentis	NA	1680	AL46-7	12	27035119	PRJNA300965	SAMN04231315	GCA_002108095.1	LNKI00000000	Feces	WGS	Illumina	2203026	59.06	1933	1817	100	0.968	Good	Human, Homo sapiens	2017-04-24	2017-05-29 03:27:15	2017-05-29 03:27:15	1848	1775	kingdom	1	0.96	0	0	0	0.93	0.89	Not_Removed	Not_Removed	Not_Removed	Not_Removed
279	1680.44	Bifidobacterium	adolescentis	NA	1680	LMG 10733	8	27035119	PRJNA300965	SAMN04231316	GCA_002108135.1	LNKJ00000000	Intestine	WGS	Ion Torrent	2084232	59.19	1783	1654	100	0.968	Good	Human, Homo sapiens	2017-04-24	2017-05-29 03:10:58	2017-05-29 03:10:58	1690	1652	kingdom	1	0.98	0	0	0	0.97	0.95	Not_Removed	Not_Removed	Not_Removed	Not_Removed
280	1680.46	Bifidobacterium	adolescentis	NA	1680	LMG 18897	33	27035119	PRJNA300965	SAMN04231319	GCA_002108165.1	LNKM00000000	Feces	WGS	Ion Torrent	2146787	59.78	1847	1751	100	0.968	Good	Human, Homo sapiens	2017-04-24	2017-05-29 03:24:11	2017-05-29 03:24:11	1796	1741	kingdom	1	0.97	0	0	0	0.93	0.91	Not_Removed	Not_Removed	Not_Removed	Not_Removed
281	1680.5	Bifidobacterium	adolescentis	NA	1680	BB23	1	NA	PRJNA271241	SAMN03273368	GCF_000817995.1	CP010437	Feces	Complete	PacBio	2173720	59.29	1836	1823	100	0.968	Good	Human, Homo sapiens	2015-01-14	2016-01-17 15:42:02	2016-01-17 15:42:02	1770	1716	kingdom	1	0.97	0	0	0	0.93	0.9	Not_Removed	Not_Removed	Not_Removed	Not_Removed
282	1680.7	Bifidobacterium	adolescentis	NA	1680	150	34	26139716	PRJNA280952	SAMN03468113	GCF_001010915.1	LBHQ00000000	Feces	WGS	Roche 454	2315664	59.35	2062	1830	100	0.968	Good	Human, Homo sapiens	2015-05-20	2016-01-17 16:03:10	2016-01-17 16:03:10	1968	1841	kingdom	1	0.94	0	0	0	0.91	0.85	Not_Removed	Not_Removed	Not_Removed	Not_Removed
283	1681.102	Bifidobacterium	bifidum	NA	1681	DS26_23	160	NA	PRJNA336518	SAMN08949002	GCA_003095035.1	QDIM00000000	Others	WGS	Illumina	2231875	62.8291	2026	1888	100	0.952	Good	Human, Homo sapiens	2018-05-06	2018-05-30 16:22:24	2018-05-30 16:22:24	1901	1826	kingdom	1	0.96	0	0	0	0.94	0.91	Not_Removed	Not_Removed	Not_Removed	Not_Removed
284	1681.103	Bifidobacterium	bifidum	NA	1681	DS25_23	63	NA	PRJNA336518	SAMN08949001	GCA_003094795.1	QDJA00000000	Others	WGS	Illumina	2226658	62.7476	1987	1867	100	0.952	Good	Human, Homo sapiens	2018-05-06	2018-05-30 16:24:01	2018-05-30 16:24:01	1870	1804	kingdom	1	0.96	0	0	0	0.94	0.91	Not_Removed	Not_Removed	Not_Removed	Not_Removed
285	1681.104	Bifidobacterium	bifidum	NA	1681	DS30_23	27	NA	PRJNA336518	SAMN08949003	GCA_003094755.1	QDIJ00000000	Others	WGS	Illumina	2254218	62.7762	2018	1893	100	0.96	Good	Human, Homo sapiens	2018-05-06	2018-05-30 16:24:33	2018-05-30 16:24:33	1909	1828	kingdom	1	0.96	0	0	0	0.93	0.89	Not_Removed	Not_Removed	Not_Removed	Not_Removed
286	1681.105	Bifidobacterium	bifidum	NA	1681	DS31_23	139	NA	PRJNA336518	SAMN08949004	GCA_003094735.1	QDII00000000	Others	WGS	Illumina	2230880	62.756	2028	1905	100	0.935	Good	Human, Homo sapiens	2018-05-06	2018-05-30 16:24:24	2018-05-30 16:24:24	1918	1837	kingdom	1	0.96	0	0	0	0.94	0.9	Not_Removed	Not_Removed	Not_Removed	Not_Removed
287	1681.106	Bifidobacterium	bifidum	NA	1681	DS32_23	157	NA	PRJNA336518	SAMN08949005	GCA_003094715.1	QDIX00000000	Others	WGS	Illumina	2279931	62.883	2130	1990	99.7	0.944	Good	Human, Homo sapiens	2018-05-06	2018-05-30 16:24:27	2018-05-30 16:24:27	1993	1890	kingdom	1	0.95	0	0	0	0.93	0.88	Not_Removed	Not_Removed	Not_Removed	Not_Removed
288	1681.107	Bifidobacterium	bifidum	NA	1681	DS33_23	140	NA	PRJNA336518	SAMN08949006	GCA_003094645.1	QDIH00000000	Others	WGS	Illumina	2229571	62.8002	2020	1894	100	0.96	Good	Human, Homo sapiens	2018-05-06	2018-05-30 16:24:37	2018-05-30 16:24:37	1900	1824	kingdom	1	0.96	0	0	0	0.94	0.91	Not_Removed	Not_Removed	Not_Removed	Not_Removed
289	1681.114	Bifidobacterium	bifidum	NA	1681	S6	1	NA	PRJNA397825	SAMN07484235	GCA_003390735.1	CP022723	Adult feces	Complete	PacBio	2311342	62.7161	2040	1907	100	0.96	Good	Human, Homo sapiens	2018-08-15	2018-09-30 16:44:47	2018-09-30 16:44:47	1924	1833	kingdom	1	0.95	0	0	0	0.94	0.9	Not_Removed	Not_Removed	Not_Removed	Not_Removed
290	1681.115	Bifidobacterium	bifidum	NA	1681	TM07-4AC	12	NA	PRJNA482748	SAMN09737006	GCA_003436135.1	QSOS00000000	Feces	WGS	Illumina	2181809	62.7547	1900	1795	100	0.96	Good	Human, Homo sapiens	2018-08-31	2018-10-02 03:58:13	2018-10-02 03:58:13	1797	1734	kingdom	1	0.96	0	0	0	0.96	0.92	Not_Removed	Not_Removed	Not_Removed	Not_Removed
291	1681.116	Bifidobacterium	bifidum	NA	1681	TM04-12	6	NA	PRJNA482748	SAMN09736968	GCA_003436575.1	QSQB00000000	Feces	WGS	Illumina	2314040	62.6647	2079	1950	100	0.96	Good	Human, Homo sapiens	2018-08-31	2018-10-02 04:11:38	2018-10-02 04:11:38	1939	1806	kingdom	1	0.93	0	0	0	0.94	0.88	Not_Removed	Not_Removed	Not_Removed	Not_Removed
292	1681.117	Bifidobacterium	bifidum	NA	1681	TM02-17	23	NA	PRJNA482748	SAMN09736965	GCA_003436635.1	QSQE00000000	Feces	WGS	Illumina	2201168	62.6163	1906	1806	99.7	0.96	Good	Human, Homo sapiens	2018-08-31	2018-10-02 04:29:49	2018-10-02 04:29:49	1785	1739	kingdom	1	0.97	0	0	0	0.96	0.94	Not_Removed	Not_Removed	Not_Removed	Not_Removed
293	1681.118	Bifidobacterium	bifidum	NA	1681	TM02-15	22	NA	PRJNA482748	SAMN09736964	GCA_003436655.1	QSQF00000000	Feces	WGS	Illumina	2200316	62.6143	1906	1803	99.7	0.96	Good	Human, Homo sapiens	2018-08-31	2018-10-02 04:13:10	2018-10-02 04:13:10	1785	1739	kingdom	1	0.97	0	0	0	0.96	0.94	Not_Removed	Not_Removed	Not_Removed	Not_Removed
294	1681.119	Bifidobacterium	bifidum	NA	1681	TF07-22	17	NA	PRJNA482748	SAMN09736904	GCA_003437175.1	QSRS00000000	Feces	WGS	Illumina	2191425	62.6093	1917	1821	100	0.96	Good	Human, Homo sapiens	2018-08-31	2018-10-02 04:23:37	2018-10-02 04:23:37	1793	1743	kingdom	1	0.97	0	0	0	0.95	0.93	Not_Removed	Not_Removed	Not_Removed	Not_Removed
295	1681.12	Bifidobacterium	bifidum	NA	1681	TF06-14AC	18	NA	PRJNA482748	SAMN09736890	GCA_003437325.1	QSSD00000000	Feces	WGS	Illumina	2166065	62.7476	1898	1787	100	0.96	Good	Human, Homo sapiens	2018-08-31	2018-10-02 04:27:57	2018-10-02 04:27:57	1782	1722	kingdom	1	0.97	0	0	0	0.95	0.92	Not_Removed	Not_Removed	Not_Removed	Not_Removed
296	1681.121	Bifidobacterium	bifidum	NA	1681	TF06-13	16	NA	PRJNA482748	SAMN09736889	GCA_003437345.1	QSSE00000000	Feces	WGS	Illumina	2166278	62.7474	1895	1787	100	0.96	Good	Human, Homo sapiens	2018-08-31	2018-10-02 04:27:22	2018-10-02 04:27:22	1782	1723	kingdom	1	0.97	0	0	0	0.95	0.92	Not_Removed	Not_Removed	Not_Removed	Not_Removed
297	1681.122	Bifidobacterium	bifidum	NA	1681	TF05-39	14	NA	PRJNA482748	SAMN09736884	GCA_003437785.1	QSSI00000000	Feces	WGS	Illumina	2178946	62.7657	1888	1778	100	0.96	Good	Human, Homo sapiens	2018-08-31	2018-10-02 04:37:29	2018-10-02 04:37:29	1784	1722	kingdom	1	0.97	0	0	0	0.96	0.93	Not_Removed	Not_Removed	Not_Removed	Not_Removed
298	1681.123	Bifidobacterium	bifidum	NA	1681	TF05-1	15	NA	PRJNA482748	SAMN09736871	GCA_003437945.1	QSSS00000000	Feces	WGS	Illumina	2329171	62.537	2073	1946	99.7	0.96	Good	Human, Homo sapiens	2018-08-31	2018-10-02 04:59:44	2018-10-02 04:59:44	1933	1810	kingdom	1	0.94	0	0	0	0.94	0.88	Not_Removed	Not_Removed	Not_Removed	Not_Removed
299	1681.124	Bifidobacterium	bifidum	NA	1681	AF11-25B	18	NA	PRJNA482748	SAMN09734209	GCA_003465425.1	QSAO00000000	Feces	WGS	Illumina	2234035	62.577	1958	1846	99.7	0.96	Good	Human, Homo sapiens	2018-09-06	2018-10-02 11:12:22	2018-10-02 11:12:22	1828	1770	kingdom	1	0.97	0	0	0	0.96	0.93	Not_Removed	Not_Removed	Not_Removed	Not_Removed
300	1681.125	Bifidobacterium	bifidum	NA	1681	TM06-5	23	NA	PRJNA482748	SAMN09736996	GCA_003466365.1	QSPA00000000	Feces	WGS	Illumina	2203875	62.605	1904	1805	99.7	0.96	Good	Human, Homo sapiens	2018-08-31	2018-10-02 11:26:25	2018-10-02 11:26:25	1783	1734	kingdom	1	0.97	0	0	0	0.96	0.93	Not_Removed	Not_Removed	Not_Removed	Not_Removed
301	1681.126	Bifidobacterium	bifidum	NA	1681	TM06-10	26	NA	PRJNA482748	SAMN09736987	GCA_003466395.1	QSPI00000000	Feces	WGS	Illumina	2207017	62.5866	1911	1803	99.7	0.96	Good	Human, Homo sapiens	2018-08-31	2018-10-02 11:26:28	2018-10-02 11:26:28	1776	1731	kingdom	1	0.97	0	0	0	0.96	0.94	Not_Removed	Not_Removed	Not_Removed	Not_Removed
302	1681.127	Bifidobacterium	bifidum	NA	1681	TM05-15	15	NA	PRJNA482748	SAMN09736979	GCA_003466485.1	QSPQ00000000	Feces	WGS	Illumina	2177368	62.764	1891	1776	100	0.96	Good	Human, Homo sapiens	2018-08-31	2018-10-02 11:26:29	2018-10-02 11:26:29	1785	1728	kingdom	1	0.97	0	0	0	0.96	0.93	Not_Removed	Not_Removed	Not_Removed	Not_Removed
303	1681.128	Bifidobacterium	bifidum	NA	1681	AM42-15AC	13	NA	PRJNA482748	SAMN09736543	GCA_003467985.1	QSGB00000000	Feces	WGS	Illumina	2309446	62.5894	2049	1916	99.7	0.96	Good	Human, Homo sapiens	2018-09-06	2018-10-02 11:54:35	2018-10-02 11:54:35	1909	1788	kingdom	1	0.94	0	0	0	0.94	0.88	Not_Removed	Not_Removed	Not_Removed	Not_Removed
304	1681.129	Bifidobacterium	bifidum	NA	1681	AM36-1AC	7	NA	PRJNA482748	SAMN09736479	GCA_003468415.1	QSHW00000000	Feces	WGS	Illumina	2153678	62.7802	1884	1788	100	0.96	Good	Human, Homo sapiens	2018-09-06	2018-10-02 11:57:04	2018-10-02 11:57:04	1782	1718	kingdom	1	0.96	0	0	0	0.95	0.92	Not_Removed	Not_Removed	Not_Removed	Not_Removed
305	1681.13	Bifidobacterium	bifidum	NA	1681	AM18-29	21	NA	PRJNA482748	SAMN09734868	GCA_003470585.1	QRJI00000000	Feces	WGS	Illumina	2201171	62.8193	1934	1821	100	0.96	Good	Human, Homo sapiens	2018-09-06	2018-10-02 12:35:04	2018-10-02 12:35:04	1806	1753	kingdom	1	0.97	0	0	0	0.95	0.92	Not_Removed	Not_Removed	Not_Removed	Not_Removed
306	1681.131	Bifidobacterium	bifidum	NA	1681	AM18-12AC	21	NA	PRJNA482748	SAMN09734861	GCA_003470615.1	QRJM00000000	Feces	WGS	Illumina	2204164	62.8148	1932	1823	100	0.96	Good	Human, Homo sapiens	2018-09-06	2018-10-02 12:35:54	2018-10-02 12:35:54	1810	1757	kingdom	1	0.97	0	0	0	0.95	0.92	Not_Removed	Not_Removed	Not_Removed	Not_Removed
307	1681.132	Bifidobacterium	bifidum	NA	1681	AM18-11	22	NA	PRJNA482748	SAMN09734860	GCA_003471555.1	QRJN00000000	Feces	WGS	Illumina	2204574	62.8123	1935	1824	100	0.96	Good	Human, Homo sapiens	2018-09-06	2018-10-02 14:51:13	2018-10-02 14:51:13	1819	1759	kingdom	1	0.97	0	0	0	0.95	0.92	Not_Removed	Not_Removed	Not_Removed	Not_Removed
308	1681.133	Bifidobacterium	bifidum	NA	1681	AM18-1	21	NA	PRJNA482748	SAMN09734857	GCA_003471595.1	QRJP00000000	Feces	WGS	Illumina	2202931	62.8207	1931	1824	100	0.96	Good	Human, Homo sapiens	2018-09-06	2018-10-02 14:51:08	2018-10-02 14:51:08	1810	1756	kingdom	1	0.97	0	0	0	0.95	0.92	Not_Removed	Not_Removed	Not_Removed	Not_Removed
309	1681.134	Bifidobacterium	bifidum	NA	1681	AM12-10	11	NA	PRJNA482748	SAMN09734784	GCA_003472345.1	QRLR00000000	Feces	WGS	Illumina	2375485	62.5461	2158	2013	99.7	0.96	Good	Human, Homo sapiens	2018-09-06	2018-10-02 15:06:57	2018-10-02 15:06:57	2005	1864	kingdom	1	0.93	0	0	0	0.93	0.86	Not_Removed	Not_Removed	Not_Removed	Not_Removed
310	1681.135	Bifidobacterium	bifidum	NA	1681	AM12-9	12	NA	PRJNA482748	SAMN09734792	GCA_003473145.1	QRLK00000000	Feces	WGS	Illumina	2373327	62.5416	2147	2017	99.7	0.96	Good	Human, Homo sapiens	2018-09-06	2018-10-02 15:22:34	2018-10-02 15:22:34	1996	1860	kingdom	1	0.93	0	0	0	0.93	0.87	Not_Removed	Not_Removed	Not_Removed	Not_Removed
311	1681.137	Bifidobacterium	bifidum	NA	1681	TMC 3115	1	NA	PRJDB5666	SAMD00078313	GCA_003573895.1	AP018132	Infant feces	Complete	PacBio	2178894	62.7878	1863	1876	99.7	0.944	Good	Human, Homo sapiens	2017-10-03	2018-10-03 15:36:09	2018-10-03 15:36:09	1793	1734	kingdom	1	0.97	0	0	0	0.95	0.92	Not_Removed	Not_Removed	Not_Removed	Not_Removed
312	1681.139	Bifidobacterium	bifidum	NA	1681	ICIS-643	64	NA	PRJNA379396	SAMN06606988	GCA_003790385.1	RJZG00000000	NA	WGS	Illumina	2281719	62.4375	2075	1925	NA	0.96	Good	Human, Homo sapiens	2018-11-18	2018-11-30 01:11:43	2018-11-30 01:11:43	1933	1862	kingdom	1	0.96	0	0	0	0.94	0.9	Not_Removed	Not_Removed	Not_Removed	Not_Removed
313	1681.23	Bifidobacterium	bifidum	NA	1681	LMG 11041	2	25085493,25107967	PRJNA239838	SAMN02673426	GCF_000741085.1	JGYO00000000	Infant feces	WGS	Ion Torrent	2208468	62.67	1910	1704	100	0.944	Good	Human, Homo sapiens	2014-08-18	2016-01-17 15:38:40	2016-01-17 15:38:40	1851	1777	kingdom	1	0.96	0	0	0	0.95	0.91	Not_Removed	Not_Removed	Not_Removed	Not_Removed
314	1681.42	Bifidobacterium	bifidum	NA	1681	BF3	1	NA	PRJNA270902	SAMN03271680	GCF_001281345.1	CP010412	Feces	Complete	PacBio	2210370	62.65	1882	1887	99.7	0.96	Good	Human, Homo sapiens	2015-09-14	2016-01-17 17:06:10	2016-01-17 17:06:10	1811	1759	kingdom	1	0.97	0	0	0	0.98	0.95	Not_Removed	Not_Removed	Not_Removed	Not_Removed
315	1681.44	Bifidobacterium	bifidum	NA	1681	IPLA 20015	17	25523018	PRJNA263318	SAMN03103719	GCF_001020405.1	JSDW00000000	Milk	WGS	Ion Torrent	2172992	62.67	1864	1691	99.7	0.952	Good	Human, Homo sapiens	2015-06-05	2016-01-17 16:05:17	2016-01-17 16:05:17	1795	1737	kingdom	1	0.97	0	0	0	0.95	0.92	Not_Removed	Not_Removed	Not_Removed	Not_Removed
316	1681.45	Bifidobacterium	bifidum	NA	1681	324B	2	25523018	PRJNA263318	SAMN03097400	GCF_001020375.1	JSDT00000000	Infant feces	WGS	Ion Torrent	2204341	62.67	1938	1724	100	0.96	Good	Human, Homo sapiens	2015-06-05	2016-01-17 16:05:17	2016-01-17 16:05:17	1852	1775	kingdom	1	0.96	0	0	0	0.95	0.91	Not_Removed	Not_Removed	Not_Removed	Not_Removed
317	1681.46	Bifidobacterium	bifidum	NA	1681	85B	9	25523018	PRJNA263318	SAMN03097398	GCF_001020355.1	JSDU00000000	Infant feces	WGS	Ion Torrent	2360966	62.97	2078	1848	100	0.96	Good	Human, Homo sapiens	2015-06-05	2016-01-17 16:05:17	2016-01-17 16:05:17	1968	1854	kingdom	1	0.94	0	0	0	0.93	0.88	Not_Removed	Not_Removed	Not_Removed	Not_Removed
318	1681.47	Bifidobacterium	bifidum	NA	1681	LMG 11583	17	25523018	PRJNA263318	SAMN03097404	GCF_001020335.1	JSDZ00000000	Adult feces	WGS	Ion Torrent	2238534	62.85	1989	1774	100	0.96	Good	Human, Homo sapiens	2015-06-05	2016-01-17 16:05:16	2016-01-17 16:05:16	1912	1840	kingdom	1	0.96	0	0	0	0.94	0.9	Not_Removed	Not_Removed	Not_Removed	Not_Removed
319	1681.48	Bifidobacterium	bifidum	NA	1681	LMG 13200	15	25523018	PRJNA263318	SAMN03097405	GCF_001020325.1	JSEB00000000	Infant feces	WGS	Ion Torrent	2176035	62.88	1894	1698	100	0.96	Good	Human, Homo sapiens	2015-06-05	2016-01-17 16:05:16	2016-01-17 16:05:16	1814	1749	kingdom	1	0.96	0	0	0	0.95	0.92	Not_Removed	Not_Removed	Not_Removed	Not_Removed
320	1681.49	Bifidobacterium	bifidum	NA	1681	LMG 11582	6	25523018	PRJNA263318	SAMN03097403	GCF_001020275.1	JSDY00000000	Adult feces	WGS	Ion Torrent	2222504	62.76	1921	1709	100	0.96	Good	Human, Homo sapiens	2015-06-05	2016-01-17 16:05:16	2016-01-17 16:05:16	1833	1774	kingdom	1	0.97	0	0	0	0.95	0.92	Not_Removed	Not_Removed	Not_Removed	Not_Removed
321	1681.5	Bifidobacterium	bifidum	NA	1681	IPLA 20017	22	25523018	PRJNA263318	SAMN03097402	GCF_001020265.1	JSDX00000000	Intestine	WGS	Ion Torrent	2178877	62.6	1915	1701	99.7	0.96	Good	Human, Homo sapiens	2015-06-05	2016-01-17 16:05:15	2016-01-17 16:05:15	1796	1722	kingdom	1	0.96	0	0	0	0.95	0.91	Not_Removed	Not_Removed	Not_Removed	Not_Removed
322	1681.51	Bifidobacterium	bifidum	NA	1681	156B	8	25523018	PRJNA263318	SAMN03097399	GCF_001020255.1	JSDS00000000	Infant feces	WGS	Ion Torrent	2191816	62.75	1909	1720	100	0.96	Good	Human, Homo sapiens	2015-06-05	2016-01-17 16:05:15	2016-01-17 16:05:15	1833	1774	kingdom	1	0.97	0	0	0	0.94	0.91	Not_Removed	Not_Removed	Not_Removed	Not_Removed
323	1681.52	Bifidobacterium	bifidum	NA	1681	A8	10	25523018	PRJNA263318	SAMN03097401	GCF_001020245.1	JSDV00000000	Infant feces	WGS	Ion Torrent	2223105	62.76	1929	1722	100	0.952	Good	Human, Homo sapiens	2015-06-05	2016-01-17 16:05:15	2016-01-17 16:05:15	1838	1780	kingdom	1	0.97	0	0	0	0.94	0.91	Not_Removed	Not_Removed	Not_Removed	Not_Removed
324	1681.53	Bifidobacterium	bifidum	NA	1681	MJR8628B	34	NA	PRJNA272088	SAMN03842220	GCF_001546225.1	LRPO00000000	Vagina	WGS	Illumina	2262348	62.75	2169	2174	100	0.96	Good	Human, Homo sapiens	2016-02-02	2016-03-01 04:49:38	2016-03-01 04:49:38	1934	1841	kingdom	1	0.95	0	0	0	0.93	0.89	Not_Removed	Not_Removed	Not_Removed	Not_Removed
325	1681.54	Bifidobacterium	bifidum	NA	1681	141.5	44	NA	PRJNA272371	SAMN04497897	GCA_001576865.1	LSUL00000000	Infant feces	WGS	Roche 454|Illumina	2105224	62.87	1867	1735	100	0.944	Good	Human, Homo sapiens	2016-02-29	2016-03-18 09:14:13	2016-03-18 09:14:13	1780	1716	kingdom	1	0.96	0	0	0	0.95	0.92	Not_Removed	Not_Removed	Not_Removed	Not_Removed
326	1681.55	Bifidobacterium	bifidum	NA	1681	170.6	72	NA	PRJNA272371	SAMN04497916	GCA_001576895.1	LSUI00000000	Infant feces	WGS	Roche 454|Illumina	2131937	63.05	1914	1792	99.7	0.952	Good	Human, Homo sapiens	2016-02-29	2016-03-18 09:15:34	2016-03-18 09:15:34	1833	1774	kingdom	1	0.97	0	0	0	0.95	0.92	Not_Removed	Not_Removed	Not_Removed	Not_Removed
327	1681.56	Bifidobacterium	bifidum	NA	1681	791	33	NA	PRJNA298114	SAMN04155634	GCF_001595435.1	LKUR00000000	Intestine	WGS	Illumina	2285457	62.41	2037	1807	100	0.96	Good	Human, Homo sapiens	2016-03-21	2016-04-27 18:33:53	2016-04-27 18:33:53	1915	1842	kingdom	1	0.96	0	0	0	0.94	0.9	Not_Removed	Not_Removed	Not_Removed	Not_Removed
328	1681.6	Bifidobacterium	bifidum	NA	1681	BI-14	26	27340092	PRJDB4597	SAMD00047595	GCF_001685685.1	BCXK00000000	Infant feces	WGS	Illumina	2184434	62.62	1830	NA	99.7	0.96	Good	Human, Homo sapiens	2016-07-09	2016-08-26 21:00:02	2016-08-26 21:00:02	1761	1693	kingdom	1	0.96	0	0	0	0.96	0.92	Not_Removed	Not_Removed	Not_Removed	Not_Removed
329	1681.761	Bifidobacterium	bifidum	NA	1681	ca_0067	8	30630933	PRJNA496358	SAMN10239585	GCA_004167365.1	RCXG00000000	Feces	WGS	Illumina	2188615	62.6736	1956	1848	NA	0.96	Good	Human, Homo sapiens	2019-02-11	2019-07-16 17:32:48	2019-07-16 17:32:48	1832	1760	kingdom	1	0.96	0	0	0	0.95	0.91	Not_Removed	Not_Removed	Not_Removed	Not_Removed
330	1681.762	Bifidobacterium	bifidum	NA	1681	ICIS-202	21	NA	PRJNA412271	SAMN07709009	GCA_004799295.1	SSMS00000000	NA	WGS	Illumina	2265060	62.4409	2020	1881	NA	0.96	Good	Human, Homo sapiens	2019-04-17	2019-07-16 17:32:47	2019-07-16 17:32:47	1884	1818	kingdom	1	0.96	0	0	0	0.94	0.91	Not_Removed	Not_Removed	Not_Removed	Not_Removed
331	1681.763	Bifidobacterium	bifidum	NA	1681	BSD2780061688st1_G1	6	NA	PRJNA518912	SAMN10863272	GCA_005844205.1	SPFT00000000	Feces	WGS	Illumina	2164212	62.6985	1844	NA	NA	0.96	Good	Human, Homo sapiens	2019-05-26	2019-07-16 17:33:53	2019-07-16 17:33:53	1780	1721	kingdom	1	0.97	0	0	0	0.95	0.92	Not_Removed	Not_Removed	Not_Removed	Not_Removed
332	1681.764	Bifidobacterium	bifidum	NA	1681	1001271st1_H11	20	NA	PRJNA518912	SAMN10863260	GCA_005844365.1	SPGB00000000	Feces	WGS	Illumina	2265274	62.7141	1969	NA	NA	0.96	Good	Human, Homo sapiens	2019-05-26	2019-07-16 17:32:00	2019-07-16 17:32:00	1881	1812	kingdom	1	0.96	0	0	0	0.95	0.91	Not_Removed	Not_Removed	Not_Removed	Not_Removed
333	1681.786	Bifidobacterium	bifidum	NA	1681	S08A.meta.bin_5	57	31384000	PRJNA492716	SAMN10316648	GCA_008669135.1	RQAE00000000	Feces	WGS	Illumina	2205205	62.9829	2002	NA	NA	0.944	Good	Human, Homo sapiens	2019-09-23	2019-10-02 14:12:23	2019-10-02 14:12:23	1922	1846	kingdom	1	0.96	0	0	0	0.94	0.9	Not_Removed	Not_Removed	Not_Removed	Not_Removed
334	1681.787	Bifidobacterium	bifidum	NA	1681	S08C.meta.bin_9	78	31384000	PRJNA492716	SAMN10316672	GCA_008670815.1	RQBC00000000	Feces	WGS	Illumina	2184197	62.9815	1970	NA	NA	0.911	Good	Human, Homo sapiens	2019-09-23	2019-10-02 14:14:11	2019-10-02 14:14:11	1890	1822	kingdom	1	0.96	0	0	0	0.95	0.91	Not_Removed	Not_Removed	Not_Removed	Not_Removed
335	1681.788	Bifidobacterium	bifidum	NA	1681	LMAG:79	4	31455406	PRJNA362284	SAMN06546883	GCA_008679685.1	NAMS00000000	Feces	WGS	PacBio	2162838	62.7268	1833	NA	NA	0.96	Good	Human, Homo sapiens	2019-09-23	2019-10-02 15:05:34	2019-10-02 15:05:34	1762	1698	kingdom	1	0.96	0	0	0	0.95	0.92	Not_Removed	Not_Removed	Not_Removed	Not_Removed
336	1681.789	Bifidobacterium	bifidum	NA	1681	LMAG:66	15	31455406	PRJNA362284	SAMN06546870	GCA_008679935.1	NAMF00000000	Feces	WGS	PacBio	2112224	62.695	1841	NA	NA	0.935	Good	Human, Homo sapiens	2019-09-23	2019-10-02 15:09:16	2019-10-02 15:09:16	1756	1687	kingdom	1	0.96	0	0	0	0.95	0.92	Not_Removed	Not_Removed	Not_Removed	Not_Removed
337	1681.79	Bifidobacterium	bifidum	NA	1681	LMAG:12	1	31455406	PRJNA362284	SAMN06546816	GCA_008681015.1	NAKD00000000	Feces	WGS	PacBio	2205987	62.6814	1901	NA	NA	0.96	Good	Human, Homo sapiens	2019-09-23	2019-10-02 15:25:09	2019-10-02 15:25:09	1829	1754	kingdom	1	0.96	0	0	0	0.95	0.91	Not_Removed	Not_Removed	Not_Removed	Not_Removed
338	1681.803	Bifidobacterium	bifidum	NA	1681	BIO5480	34	NA	PRJNA574342	SAMN12856545	GCA_008868415.1	WBNT00000000	Intestine	WGS	Illumina	2228298	62.852	2031	1895	NA	0.96	Good	Human, Homo sapiens	2019-10-07	2019-10-27 20:57:01	2019-10-27 20:57:01	1910	1837	kingdom	1	0.96	0	0	0	0.94	0.9	Not_Removed	Not_Removed	Not_Removed	Not_Removed
339	1681.804	Bifidobacterium	bifidum	NA	1681	BIOML-A2	32	31477907	PRJNA544527	SAMN11944592	GCA_009075765.1	WDOE00000000	Feces	WGS	Illumina	2221964	62.7397	1999	1894	NA	0.96	Good	Human, Homo sapiens	2019-10-15	2019-10-28 01:07:46	2019-10-28 01:07:46	1872	1799	kingdom	1	0.96	0	0	0	0.94	0.91	Not_Removed	Not_Removed	Not_Removed	Not_Removed
340	1681.805	Bifidobacterium	bifidum	NA	1681	BIOML-A1	13	31477907	PRJNA544527	SAMN11944591	GCA_009075785.1	WDOD00000000	Feces	WGS	Illumina	2186387	62.7452	1952	1840	NA	0.96	Good	Human, Homo sapiens	2019-10-15	2019-10-28 01:08:13	2019-10-28 01:08:13	1824	1756	kingdom	1	0.96	0	0	0	0.95	0.91	Not_Removed	Not_Removed	Not_Removed	Not_Removed
341	1681.806	Bifidobacterium	bifidum	NA	1681	BIOML-A8	5	31477907	PRJNA544527	SAMN11944598	GCA_009077915.1	WDOK00000000	Feces	WGS	Illumina	2189089	62.6756	1946	1842	NA	0.96	Good	Human, Homo sapiens	2019-10-15	2019-10-28 01:10:48	2019-10-28 01:10:48	1830	1759	kingdom	1	0.96	0	0	0	0.95	0.91	Not_Removed	Not_Removed	Not_Removed	Not_Removed
342	1681.807	Bifidobacterium	bifidum	NA	1681	BIOML-A7	10	31477907	PRJNA544527	SAMN11944597	GCA_009077955.1	WDOJ00000000	Feces	WGS	Illumina	2179265	62.7805	1938	1834	NA	0.96	Good	Human, Homo sapiens	2019-10-15	2019-10-28 01:09:10	2019-10-28 01:09:10	1815	1749	kingdom	1	0.96	0	0	0	0.95	0.91	Not_Removed	Not_Removed	Not_Removed	Not_Removed
343	1681.808	Bifidobacterium	bifidum	NA	1681	BIOML-A6	8	31477907	PRJNA544527	SAMN11944596	GCA_009077975.1	WDOI00000000	Feces	WGS	Illumina	2185518	62.7206	1945	1841	NA	0.96	Good	Human, Homo sapiens	2019-10-15	2019-10-28 01:09:12	2019-10-28 01:09:12	1829	1759	kingdom	1	0.96	0	0	0	0.95	0.91	Not_Removed	Not_Removed	Not_Removed	Not_Removed
344	1681.809	Bifidobacterium	bifidum	NA	1681	BIOML-A5	10	31477907	PRJNA544527	SAMN11944595	GCA_009078005.1	WDOH00000000	Feces	WGS	Illumina	2179450	62.7801	1936	1833	NA	0.96	Good	Human, Homo sapiens	2019-10-15	2019-10-28 01:09:39	2019-10-28 01:09:39	1814	1748	kingdom	1	0.96	0	0	0	0.95	0.91	Not_Removed	Not_Removed	Not_Removed	Not_Removed
345	1681.81	Bifidobacterium	bifidum	NA	1681	BIOML-A4	9	31477907	PRJNA544527	SAMN11944594	GCA_009078015.1	WDOG00000000	Feces	WGS	Illumina	2184719	62.7716	1939	1835	NA	0.96	Good	Human, Homo sapiens	2019-10-15	2019-10-28 01:10:52	2019-10-28 01:10:52	1815	1748	kingdom	1	0.96	0	0	0	0.94	0.91	Not_Removed	Not_Removed	Not_Removed	Not_Removed
346	1681.811	Bifidobacterium	bifidum	NA	1681	BIOML-A11	21	31477907	PRJNA544527	SAMN11944601	GCA_009078055.1	WDON00000000	Feces	WGS	Illumina	2168244	62.7635	1907	1793	NA	0.96	Good	Human, Homo sapiens	2019-10-15	2019-10-28 01:10:45	2019-10-28 01:10:45	1779	1720	kingdom	1	0.97	0	0	0	0.95	0.92	Not_Removed	Not_Removed	Not_Removed	Not_Removed
347	1681.812	Bifidobacterium	bifidum	NA	1681	BIOML-A3	8	31477907	PRJNA544527	SAMN11944593	GCA_009078065.1	WDOF00000000	Feces	WGS	Illumina	2180120	62.7799	1937	1832	NA	0.96	Good	Human, Homo sapiens	2019-10-15	2019-10-28 01:10:50	2019-10-28 01:10:50	1814	1746	kingdom	1	0.96	0	0	0	0.95	0.91	Not_Removed	Not_Removed	Not_Removed	Not_Removed
348	1681.813	Bifidobacterium	bifidum	NA	1681	BIOML-A9	8	31477907	PRJNA544527	SAMN11944599	GCA_009078095.1	WDOL00000000	Feces	WGS	Illumina	2180064	62.7809	1936	1833	NA	0.96	Good	Human, Homo sapiens	2019-10-15	2019-10-28 01:11:16	2019-10-28 01:11:16	1813	1745	kingdom	1	0.96	0	0	0	0.95	0.91	Not_Removed	Not_Removed	Not_Removed	Not_Removed
349	1681.814	Bifidobacterium	bifidum	NA	1681	BIOML-A10	22	31477907	PRJNA544527	SAMN11944600	GCA_009078115.1	WDOM00000000	Feces	WGS	Illumina	2166559	62.7697	1899	1794	NA	0.96	Good	Human, Homo sapiens	2019-10-15	2019-10-28 01:11:14	2019-10-28 01:11:14	1777	1720	kingdom	1	0.97	0	0	0	0.95	0.92	Not_Removed	Not_Removed	Not_Removed	Not_Removed
350	1681.815	Bifidobacterium	bifidum	NA	1681	BIOML-A21	103	31477907	PRJNA544527	SAMN11944611	GCA_009159095.1	WDOX00000000	Feces	WGS	Illumina	2375841	62.3645	2179	2038	NA	0.96	Good	Human, Homo sapiens	2019-10-16	2019-10-28 01:48:42	2019-10-28 01:48:42	2021	1940	kingdom	1	0.96	0	0	0	0.95	0.91	Not_Removed	Not_Removed	Not_Removed	Not_Removed
351	1681.819	Bifidobacterium	bifidum	NA	1681	BIOML-A18	196	31477907	PRJNA544527	SAMN11944608	GCA_009160775.1	WDOU00000000	Feces	WGS	Illumina	2159741	62.7216	2070	1932	NA	0.919	Good	Human, Homo sapiens	2019-10-16	2019-10-28 01:50:21	2019-10-28 01:50:21	1927	1855	kingdom	1	0.96	0	0	0	0.95	0.92	Not_Removed	Not_Removed	Not_Removed	Not_Removed
352	1681.82	Bifidobacterium	bifidum	NA	1681	1887B	21	NA	PRJNA379831	SAMN06621707	GCA_002076105.1	NAQK00000000	Milk	WGS	Unknown	2255543	62.63	1956	1851	99.7	0.96	Good	Human, Homo sapiens	2017-03-31	2017-05-28 06:02:59	2017-05-28 06:02:59	1890	1801	kingdom	1	0.95	0	0	0	0.94	0.9	Not_Removed	Not_Removed	Not_Removed	Not_Removed
353	1681.82	Bifidobacterium	bifidum	NA	1681	BIOML-A25	45	31477907	PRJNA544527	SAMN11944615	GCA_009160825.1	WDOZ00000000	Feces	WGS	Illumina	2229688	62.3105	2001	1866	NA	0.96	Good	Human, Homo sapiens	2019-10-16	2019-10-28 01:51:24	2019-10-28 01:51:24	1865	1786	class	0.98	0.94	0.97	0.03	0.05	0.95	0.89	Removed	Not_Removed	Not_Removed	Removed
354	1681.821	Bifidobacterium	bifidum	NA	1681	BIOML-A17	75	31477907	PRJNA544527	SAMN11944607	GCA_009160845.1	WDOT00000000	Feces	WGS	Illumina	2173602	62.7353	1966	1848	NA	0.952	Good	Human, Homo sapiens	2019-10-16	2019-10-28 01:51:17	2019-10-28 01:51:17	1823	1763	kingdom	1	0.97	0	0	0	0.95	0.92	Not_Removed	Not_Removed	Not_Removed	Not_Removed
355	1681.823	Bifidobacterium	bifidum	NA	1681	BIOML-A14	18	31477907	PRJNA544527	SAMN11944604	GCA_009160885.1	WDOQ00000000	Feces	WGS	Illumina	2167842	62.765	1908	1791	NA	0.96	Good	Human, Homo sapiens	2019-10-16	2019-10-28 01:51:31	2019-10-28 01:51:31	1777	1715	kingdom	1	0.97	0	0	0	0.95	0.92	Not_Removed	Not_Removed	Not_Removed	Not_Removed
356	1681.824	Bifidobacterium	bifidum	NA	1681	BIOML-A12	19	31477907	PRJNA544527	SAMN11944602	GCA_009160905.1	WDOO00000000	Feces	WGS	Illumina	2167037	62.7628	1905	1789	NA	0.96	Good	Human, Homo sapiens	2019-10-16	2019-10-28 01:51:53	2019-10-28 01:51:53	1776	1714	kingdom	1	0.97	0	0	0	0.95	0.92	Not_Removed	Not_Removed	Not_Removed	Not_Removed
357	1681.825	Bifidobacterium	bifidum	NA	1681	BIOML-A15	95	31477907	PRJNA544527	SAMN11944605	GCA_009160915.1	WDOR00000000	Feces	WGS	Illumina	2405115	62.575	2170	2048	NA	0.96	Good	Human, Homo sapiens	2019-10-16	2019-10-28 01:52:32	2019-10-28 01:52:32	2023	1957	kingdom	1	0.97	0	0	0	0.96	0.92	Not_Removed	Not_Removed	Not_Removed	Not_Removed
358	1681.83	Bifidobacterium	bifidum	NA	1681	ICIS-310	32	NA	PRJNA345151	SAMN05858649	GCA_002114145.1	NBYL00000000	Elderly feces	WGS	Illumina	2219632	62.37	1978	1825	100	0.96	Good	Human, Homo sapiens	2017-04-28	2017-05-29 08:59:32	2017-05-29 08:59:32	1850	1780	phylum	1	0.96	0.16	0.02	0.04	0.94	0.9	Not_Removed	Not_Removed	Not_Removed	Not_Removed
359	1681.835	Bifidobacterium	bifidum	NA	1681	BIOML-A24	129	31477907	PRJNA544527	SAMN11944614	GCA_009159495.1	WDOY00000000	Feces	WGS	Illumina	2327549	62.4094	2148	2015	NA	0.96	Good	Human, Homo sapiens	2019-10-16	2019-11-25 04:50:14	2019-11-25 04:50:14	2001	1920	kingdom	1	0.96	0	0	0	0.94	0.91	Not_Removed	Not_Removed	Not_Removed	Not_Removed
360	1681.836	Bifidobacterium	bifidum	NA	1681	BIOML-A20	24	31477907	PRJNA544527	SAMN11944610	GCA_009159505.1	WDOW00000000	Feces	WGS	Illumina	2172464	62.7355	1912	1793	NA	0.96	Good	Human, Homo sapiens	2019-10-16	2019-11-25 04:51:06	2019-11-25 04:51:06	1786	1721	kingdom	1	0.96	0	0	0	0.95	0.92	Not_Removed	Not_Removed	Not_Removed	Not_Removed
361	1681.837	Bifidobacterium	bifidum	NA	1681	BIOML-A19	31	31477907	PRJNA544527	SAMN11944609	GCA_009159555.1	WDOV00000000	Feces	WGS	Illumina	2202719	62.6515	1958	1841	NA	0.96	Good	Human, Homo sapiens	2019-10-16	2019-11-25 04:51:27	2019-11-25 04:51:27	1821	1747	kingdom	1	0.96	0	0	0	0.95	0.91	Not_Removed	Not_Removed	Not_Removed	Not_Removed
362	1681.838	Bifidobacterium	bifidum	NA	1681	BIOML-A16	158	31477907	PRJNA544527	SAMN11944606	GCA_009160865.1	WDOS00000000	Feces	WGS	Illumina	2166978	62.7672	2032	1895	NA	0.927	Good	Human, Homo sapiens	2019-10-16	2019-11-25 04:53:04	2019-11-25 04:53:04	1896	1824	kingdom	1	0.96	0	0	0	0.95	0.91	Not_Removed	Not_Removed	Not_Removed	Not_Removed
363	1681.854	Bifidobacterium	bifidum	NA	1681	VA07-1AN	16	NA	PRJNA604908	SAMN14087237		JAAJBJ010000005,JAAJBJ010000006,JAAJBJ010000007,JAAJBJ010000008,JAAJBJ010000009,JAAJBJ010000010,JAAJBJ010000011	Vagina	WGS	Illumina	2161794	62.6501	1856	1740	NA	0.96	Good	Human, Homo sapiens	2020-02-26	2020-03-27 14:18:20	2020-03-27 14:18:20	1755	1702	kingdom	1	0.97	0	0	0	0.96	0.93	Not_Removed	Not_Removed	Not_Removed	Not_Removed
364	1681.92	Bifidobacterium	bifidum	NA	1681	1 G1971	13	NA	PRJNA383102	SAMN06759457	GCA_002469385.1	NDXI00000000	NA	WGS	Ion Torrent	2198027	62.69	2107	1827	100	0.871	Good	Human, Homo sapiens	2017-10-06	2017-11-23 03:27:34	2017-11-23 03:27:34	1981	1888	kingdom	1	0.95	0	0	0	0.95	0.91	Not_Removed	Not_Removed	Not_Removed	Not_Removed
365	1681.94	Bifidobacterium	bifidum	NA	1681	PRI 1	1	NA	PRJNA257684	SAMN06140833	GCA_002845845.1	CP018757	NA	Complete	PacBio	2243572	62.74	1919	NA	100	0.96	Good	Human, Homo sapiens	2017-12-20	2018-01-01 06:36:28	2018-01-01 06:36:28	1855	1789	kingdom	1	0.96	0	0	0	0.94	0.91	Not_Removed	Not_Removed	Not_Removed	Not_Removed
366	1681.953	Bifidobacterium	bifidum	NA	1681	COPD001	145	NA	PRJNA562766	SAMN12904948	GCA_014871885.1	WGSA00000000	Feces	WGS	Illumina	2142523	63.0144	1958	NA	NA	0.903	Good	Human, Homo sapiens	2020-10-08	2020-11-29 14:05:01	2020-11-29 14:05:01	1877	1811	kingdom	1	0.96	0	0	0	0.96	0.92	Not_Removed	Not_Removed	Not_Removed	Not_Removed
367	1681.954	Bifidobacterium	bifidum	NA	1681	1001283B150225_161107_H11	14	NA	PRJNA637878	SAMN15532824		JADMYI000000000	Feces	WGS	Illumina	2211648	62.7996	1900	NA	NA	0.96	Good	Human, Homo sapiens	2020-11-17	2020-11-30 15:19:49	2020-11-30 15:19:49	1828	1768	kingdom	1	0.97	0	0	0	0.96	0.92	Not_Removed	Not_Removed	Not_Removed	Not_Removed
368	1681.955	Bifidobacterium	bifidum	NA	1681	BSD2780061687_150420_D1	9	NA	PRJNA637878	SAMN15532514		JADMYV000000000	Feces	WGS	Illumina	2174938	62.4815	1866	NA	NA	0.96	Good	Human, Homo sapiens	2020-11-17	2020-11-30 15:22:36	2020-11-30 15:22:36	1804	1739	kingdom	1	0.96	0	0	0	0.95	0.92	Not_Removed	Not_Removed	Not_Removed	Not_Removed
369	1681.956	Bifidobacterium	bifidum	NA	1681	D52t1_170925_G6	25	NA	PRJNA637878	SAMN15532784		JADMZN010000010,JADMZN010000011,JADMZN010000012,JADMZN010000013,JADMZN010000014,JADMZN010000015,JADMZN010000016	Feces	WGS	Illumina	2176937	62.7729	1895	NA	NA	0.96	Good	Human, Homo sapiens	2020-11-17	2020-11-30 15:24:22	2020-11-30 15:24:22	1800	1736	kingdom	1	0.96	0	0	0	0.95	0.91	Not_Removed	Not_Removed	Not_Removed	Not_Removed
370	1681.957	Bifidobacterium	bifidum	NA	1681	D31t1_170403_D8	18	NA	PRJNA637878	SAMN15532543		JADNCY010000010,JADNCY010000011,JADNCY010000012,JADNCY010000013,JADNCY010000014,JADNCY010000015,JADNCY010000016	Feces	WGS	Illumina	2155890	62.5807	1850	NA	NA	0.96	Good	Human, Homo sapiens	2020-11-17	2020-11-30 15:37:18	2020-11-30 15:37:18	1779	1720	kingdom	1	0.97	0	0	0	0.96	0.92	Not_Removed	Not_Removed	Not_Removed	Not_Removed
371	1681.958	Bifidobacterium	bifidum	NA	1681	BSD2780061688b_171218_F12	6	NA	PRJNA637878	SAMN15532763		JADNJO000000000	Feces	WGS	Illumina	2164931	62.7025	1827	NA	NA	0.96	Good	Human, Homo sapiens	2020-11-17	2020-11-30 16:06:39	2020-11-30 16:06:39	1777	1719	kingdom	1	0.97	0	0	0	0.95	0.92	Not_Removed	Not_Removed	Not_Removed	Not_Removed
372	1681.967	Bifidobacterium	bifidum	NA	1681	1001271B_151109_F2	104	NA	PRJNA637878	SAMN15533074		JADPDP010000099,JADPDP010000100,JADPDP010000101,JADPDP010000102,JADPDP010000103,JADPDP010000104,JADPDP010000010	Feces	WGS	Illumina	2261134	62.7513	2045	NA	NA	0.944	Good	Human, Homo sapiens	2020-11-23	2021-01-01 16:28:49	2021-01-01 16:28:49	1955	1880	kingdom	1	0.96	0	0	0	0.95	0.91	Not_Removed	Not_Removed	Not_Removed	Not_Removed
373	1681.968	Bifidobacterium	bifidum	NA	1681	1001136B_160425_F1	22	NA	PRJNA637878	SAMN15532708		JADPEE010000010,JADPEE010000011,JADPEE010000012,JADPEE010000013,JADPEE010000014,JADPEE010000015,JADPEE010000016	Feces	WGS	Illumina	2144986	62.6267	1822	NA	NA	0.96	Good	Human, Homo sapiens	2020-11-23	2021-01-01 16:33:02	2021-01-01 16:33:02	1749	1696	kingdom	1	0.97	0	0	0	0.96	0.93	Not_Removed	Not_Removed	Not_Removed	Not_Removed
374	1681.969	Bifidobacterium	bifidum	NA	1681	VKPM Ac-1784	15	NA	PRJNA656137	SAMN15880062		JACTOF000000000	Feces	WGS	Illumina	2267064	62.4391	1991	1833	NA	0.96	Good	Human, Homo sapiens	2020-12-15	2021-01-01 19:43:55	2021-01-01 19:43:55	1886	1816	kingdom	1	0.96	0	0	0	0.94	0.9	Not_Removed	Not_Removed	Not_Removed	Not_Removed
375	1681.97	Bifidobacterium	bifidum	NA	1681	VKPM Ac-1579	41	NA	PRJNA656137	SAMN15880060		JACTOD000000000	Feces	WGS	Illumina	2231702	62.7706	1988	1830	NA	0.96	Good	Human, Homo sapiens	2020-12-15	2021-01-02 05:43:50	2021-01-02 05:43:50	1879	1795	kingdom	1	0.96	0	0	0	0.94	0.9	Not_Removed	Not_Removed	Not_Removed	Not_Removed
376	1681.971	Bifidobacterium	bifidum	NA	1681	UBBB-55	3	NA	PRJNA493554	SAMN16793263		JADPYV000000000	Infant feces	WGS	Illumina	2199865	62.6923	1930	1788	NA	0.944	Good	Human, Homo sapiens	2020-12-22	2021-01-02 01:10:16	2021-01-02 01:10:16	1861	1784	kingdom	1	0.96	0	0	0	0.95	0.91	Not_Removed	Not_Removed	Not_Removed	Not_Removed
377	1682.12	Bifidobacterium	longum	subsp. infantis	1682	BIO5478	29	NA	PRJNA574342	SAMN12856543	GCA_008868445.1	WBNV00000000	Infant feces	WGS	Illumina	2573636	59.3904	2474	2312	NA	0.952	Good	Human, Homo sapiens	2019-10-07	2019-10-27 20:57:28	2019-10-27 20:57:28	2273	2185	phylum	1	0.96	0.12	0.04	0.08	0.88	0.84	Not_Removed	Not_Removed	Not_Removed	Not_Removed
378	1682.13	Bifidobacterium	longum	subsp. infantis	1682	BIC1206122787	57	NA	PRJEB7117	SAMEA2747183	GCA_000825005.1	CCWN00000000	Others	WGS	Unknown	2789037	59.82	2614	2540	100	0.935	Good	Human, Homo sapiens	2014-12-19	2015-03-12 13:48:22	2015-03-16 03:17:09	2588	2307	phylum	0.99	0.89	0.15	0.03	0.07	0.86	0.76	Not_Removed	Not_Removed	Not_Removed	Not_Removed
379	1682.142	Bifidobacterium	longum	subsp. infantis	1682	BI-G201	67	NA	PRJNA632428	SAMN14908987		JABNND000000000	Feces	WGS	Illumina	2568669	59.3467	2399	2215	NA	0.952	Good	Human, Homo sapiens	2020-06-01	2020-07-01 02:02:40	2020-07-01 02:02:40	2290	2185	phylum	1	0.95	0.28	0.04	0.08	0.88	0.83	Not_Removed	Not_Removed	Not_Removed	Not_Removed
380	1682.15	Bifidobacterium	longum	subsp. infantis	1682	BIC1401111250	60	NA	PRJEB7117	SAMEA2747185	GCA_000825045.1	CCWP00000000	Others	WGS	Unknown	2793888	59.81	2614	2544	100	0.935	Good	Human, Homo sapiens	2014-12-19	2015-03-12 13:48:23	2015-03-16 03:17:09	2602	2313	phylum	0.99	0.88	0.17	0.03	0.07	0.86	0.76	Not_Removed	Not_Removed	Not_Removed	Not_Removed
381	1682.16	Bifidobacterium	longum	subsp. infantis	1682	KCTC 5934	1	NA	PRJNA661151	SAMN16365385	GCA_014898135.1	CP062937	Feces	Complete	PacBio	2371627	59.9103	2077	1957	NA	0.943	Good	Human, Homo sapiens	2020-10-20	2020-11-29 18:14:28	2020-11-29 18:14:28	1986	1922	kingdom	1	0.97	0	0	0	0.93	0.9	Not_Removed	Not_Removed	Not_Removed	Not_Removed
382	1682.161	Bifidobacterium	longum	subsp. infantis	1682	JCM 11660	1	NA	PRJNA666147	SAMN16365394	GCA_015102035.1	CP062952	Infant feces	Complete	PacBio	2380033	60.1225	2093	1975	NA	0.943	Good	Human, Homo sapiens	2020-10-20	2020-11-30 12:59:45	2020-11-30 12:59:45	2004	1922	kingdom	1	0.96	0	0	0	0.93	0.89	Not_Removed	Not_Removed	Not_Removed	Not_Removed
383	1682.162	Bifidobacterium	longum	subsp. infantis	1682	JCM 11347	1	NA	PRJNA666146	SAMN16365393	GCA_015102215.1	CP062951	Infant feces	Complete	PacBio	2821460	59.8596	2650	2438	NA	0.952	Good	Human, Homo sapiens	2020-10-20	2020-11-30 00:55:32	2020-11-30 00:55:32	2463	2332	kingdom	1	0.95	0	0	0	0.87	0.82	Not_Removed	Not_Removed	Not_Removed	Not_Removed
384	1682.24	Bifidobacterium	longum	subsp. infantis	1682	BT1	1	NA	PRJNA270905	SAMN03271683	GCA_001281305.1	CP010411	Feces	Complete	PacBio	2578115	59.39	2359	2319	100	0.952	Good	Human, Homo sapiens	2015-09-14	2016-01-17 17:06:09	2016-01-17 17:06:09	2208	2123	kingdom	1	0.96	0	0	0	0.88	0.84	Not_Removed	Not_Removed	Not_Removed	Not_Removed
385	1682.27	Bifidobacterium	longum	subsp. infantis	1682	IN-07	114	27340092	PRJDB4597	SAMD00047616	GCF_001686105.1	BCYF00000000	Infant feces	WGS	Illumina	2749833	60.03	2520	NA	100	0.951	Good	Human, Homo sapiens	2016-07-09	2016-08-26 21:29:47	2016-08-26 21:29:47	2399	2267	phylum	1	0.94	0.18	0.03	0.05	0.88	0.83	Not_Removed	Not_Removed	Not_Removed	Not_Removed
386	1682.29	Bifidobacterium	longum	subsp. infantis	1682	IN-F29	58	27340092	PRJDB4597	SAMD00047617	GCF_001686125.1	BCYG00000000	Infant feces	WGS	Illumina	2643621	59.87	2429	NA	100	0.944	Good	Human, Homo sapiens	2016-07-09	2016-09-11 14:16:30	2016-09-11 14:16:30	2328	2211	phylum	0.99	0.94	0.18	0.04	0.08	0.88	0.83	Not_Removed	Not_Removed	Not_Removed	Not_Removed
387	1682.32	Bifidobacterium	longum	subsp. infantis	1682	1888B	26	NA	PRJNA379831	SAMN06621708	GCA_002076025.1	NAQJ00000000	Infant feces	WGS	Unknown	2579732	59.4	2395	2212	100	0.952	Good	Human, Homo sapiens	2017-03-31	2017-05-28 05:51:37	2017-05-28 05:51:37	2229	2139	phylum	1	0.96	0.1	0.04	0.07	0.88	0.84	Not_Removed	Not_Removed	Not_Removed	Not_Removed
388	1682.48	Bifidobacterium	longum	subsp. infantis	1682	NCTC11817	1	NA	PRJEB6403	SAMEA44530168	GCA_900637215.1	LR134354	Intestine	Complete	Unknown	2832748	59.8635	2744	2543	NA	0.944	Good	Human, Homo sapiens	2018-12-19	2019-02-01 13:53:49	2019-02-01 13:53:49	2570	2300	kingdom	1	0.89	0	0	0	0.85	0.76	Not_Removed	Not_Removed	Not_Removed	Not_Removed
389	1682.71	Bifidobacterium	longum	subsp. infantis	1682	TPY12-1	44	27782805	PRJNA339033	SAMN05578879	GCA_001870755.1	MOAF00000000	Infant feces	WGS	Illumina	2640127	59.7509	2519	2262	NA	0.935	Good	Human, Homo sapiens	2016-11-07	2019-07-18 03:01:19	2019-07-18 03:01:19	2369	2204	phylum	1	0.93	0.18	0.02	0.05	0.87	0.81	Not_Removed	Not_Removed	Not_Removed	Not_Removed
390	1682.73	Bifidobacterium	longum	subsp. infantis	1682	Bi-26	40	NA	PRJNA503890	SAMN10380491	GCA_004919065.1	RJJM00000000	Infant feces	WGS	Illumina	2569437	59.4025	2482	2321	NA	0.952	Good	Human, Homo sapiens	2019-04-26	2019-07-18 03:32:35	2019-07-18 03:32:35	2272	2179	phylum	1	0.96	0.2	0.04	0.08	0.88	0.84	Not_Removed	Not_Removed	Not_Removed	Not_Removed
391	1683.3	Bifidobacterium	angulatum	NA	1683	LMG 11039	6	25085493	PRJNA239835	SAMN02673423	GCA_000741065.1	JGYL00000000	Feces	WGS	Ion Torrent	2003806	59.4	1661	1523	100	0.944	Good	Human, Homo sapiens	2014-08-18	2014-12-08 23:13:26	2015-03-16 03:17:09	1566	1540	kingdom	1	0.98	0	0	0	0.96	0.94	Not_Removed	Not_Removed	Not_Removed	Not_Removed
392	1683.4	Bifidobacterium	angulatum	NA	1683	GT102	15	26139716	PRJNA278963	SAMN03435124	GCF_000966445.1	LAHN00000000	Feces	WGS	Roche 454	2046632	59.29	1724	1520	100	0.952	Good	Human, Homo sapiens	2015-04-09	2016-01-17 15:52:13	2016-01-17 15:52:13	1644	1604	kingdom	1	0.98	0	0	0	0.98	0.96	Not_Removed	Not_Removed	Not_Removed	Not_Removed
393	1685.1	Bifidobacterium	breve	NA	1685	BR3	2	NA	PRJNA270903	SAMN03271681	GCA_001281425.1	CP010413,CP010414	NA	Complete	PacBio	2426006	59.09	2182	2168	100	0.944	Good	Human, Homo sapiens	2015-09-14	2016-01-17 17:06:12	2016-01-17 17:06:12	2129	2077	kingdom	1	0.98	0	0	0	0.98	0.96	Not_Removed	Not_Removed	Not_Removed	Not_Removed
394	1685.11	Bifidobacterium	breve	NA	1685	GED8481	29	NA	PRJNA272085	SAMN03842221	GCF_001546235.1	LRPP00000000	Vagina	WGS	Illumina	2358436	58.61	2247	2255	100	0.935	Good	Human, Homo sapiens	2016-02-02	2016-03-01 04:48:19	2016-03-01 04:48:19	2051	1976	kingdom	1	0.96	0	0	0	0.93	0.9	Not_Removed	Not_Removed	Not_Removed	Not_Removed
395	1685.17	Bifidobacterium	breve	NA	1685	DS15_17	17	NA	PRJNA336518	SAMN06464121	GCA_003095095.1	QDIS00000000	Others	WGS	Illumina	2260680	58.8767	2077	2010	100	0.952	Good	Human, Homo sapiens	2018-05-06	2018-05-30 16:22:27	2018-05-30 16:22:27	1971	1916	kingdom	1	0.97	0	0	0	0.94	0.91	Not_Removed	Not_Removed	Not_Removed	Not_Removed
396	1685.178	Bifidobacterium	breve	NA	1685	N6D12	42	28552417	PRJNA387952	SAMN07189843	GCA_003370105.1	NJOA00000000	Vagina	WGS	Illumina	2290315	58.7635	2125	2041	99.7	0.935	Good	Human, Homo sapiens	2018-08-10	2018-09-30 13:56:42	2018-09-30 13:56:42	1963	1891	kingdom	1	0.96	0	0	0	0.94	0.9	Not_Removed	Not_Removed	Not_Removed	Not_Removed
397	1685.179	Bifidobacterium	breve	NA	1685	W20-13	65	28552417	PRJNA387952	SAMN07189841	GCA_003370125.1	NJOC00000000	Vagina	WGS	Illumina	2295149	58.6165	2173	2060	99.7	0.911	Good	Human, Homo sapiens	2018-08-10	2018-09-30 13:56:46	2018-09-30 13:56:46	2034	1956	kingdom	1	0.96	0	0	0	0.93	0.9	Not_Removed	Not_Removed	Not_Removed	Not_Removed
398	1685.181	Bifidobacterium	breve	NA	1685	322-1	103	28552417	PRJNA387952	SAMN07189839	GCA_003370175.1	NJOE00000000	Vagina	WGS	Illumina	2236836	58.7496	2109	1976	98.2	0.871	Good	Human, Homo sapiens	2018-08-10	2018-09-30 13:58:04	2018-09-30 13:58:04	1971	1918	kingdom	1	0.97	0	0	0	0.94	0.92	Not_Removed	Not_Removed	Not_Removed	Not_Removed
399	1685.182	Bifidobacterium	breve	NA	1685	30-1	37	28552417	PRJNA387952	SAMN07189837	GCA_003370195.1	NJOG00000000	Vagina	WGS	Illumina	2539531	59.2698	2634	2271	98.4	0.887	Good	Human, Homo sapiens	2018-08-10	2018-09-30 14:01:52	2018-09-30 14:01:52	2364	2179	kingdom	1	0.92	0	0	0	0.91	0.84	Not_Removed	Not_Removed	Not_Removed	Not_Removed
400	1685.183	Bifidobacterium	breve	NA	1685	W56	37	28552417	PRJNA387952	SAMN07189842	GCA_003370265.1	NJOB00000000	Vagina	WGS	Illumina	2364053	58.6277	2269	2152	100	0.911	Good	Human, Homo sapiens	2018-08-10	2018-09-30 14:00:18	2018-09-30 14:00:18	2074	1999	kingdom	1	0.96	0	0	0	0.93	0.89	Not_Removed	Not_Removed	Not_Removed	Not_Removed
401	1685.191	Bifidobacterium	breve	NA	1685	Not applicable	1	NA	PRJNA231221	SAMN10163185	GCA_003813065.1	CP033841	NA	Complete	Illumina|PacBio	2275646	58.8875	2060	2004	NA	0.952	Good	Human, Homo sapiens	2018-11-21	2018-11-30 03:13:53	2018-11-30 03:13:53	1951	1898	kingdom	1	0.97	0	0	0	0.94	0.91	Not_Removed	Not_Removed	Not_Removed	Not_Removed
402	1685.199	Bifidobacterium	breve	NA	1685	lw01	1	NA	PRJNA507053	SAMN10484345	GCA_003860285.1	CP034192	Infant feces	Complete	Illumina	2313172	58.7668	2097	2014	NA	0.952	Good	Human, Homo sapiens	2018-12-04	2019-01-30 09:53:32	2019-01-30 09:53:32	1973	1903	kingdom	1	0.96	0	0	0	0.94	0.9	Not_Removed	Not_Removed	Not_Removed	Not_Removed
403	1685.2	Bifidobacterium	breve	NA	1685	NCTC11815	1	NA	PRJEB6403	SAMEA4076721	GCA_900637145.1	LR134348	Intestine	Complete	Unknown	2275664	58.8875	2008	1924	NA	0.952	Good	Human, Homo sapiens	2018-12-19	2019-02-01 13:49:24	2019-02-01 13:49:24	1952	1900	kingdom	1	0.97	0	0	0	0.94	0.91	Not_Removed	Not_Removed	Not_Removed	Not_Removed
404	1685.33	Bifidobacterium	breve	NA	1685	BR-A29	62	27340092	PRJDB4597	SAMD00047604	GCF_001685865.1	BCXT00000000	Infant feces	WGS	Illumina	2387635	58.76	2096	NA	100	0.952	Good	Human, Homo sapiens	2016-07-09	2016-08-26 20:59:53	2016-08-26 20:59:53	2049	1988	kingdom	1	0.97	0	0	0	0.94	0.91	Not_Removed	Not_Removed	Not_Removed	Not_Removed
405	1685.38	Bifidobacterium	breve	NA	1685	BR-06	101	27340092	PRJDB4597	SAMD00047596	GCF_001685705.1	BCXL00000000	Infant feces	WGS	Illumina	2660803	59.17	2389	NA	100	0.952	Good	Human, Homo sapiens	2016-07-09	2016-09-11 13:38:41	2016-09-11 13:38:41	2345	2260	kingdom	1	0.96	0	0	0	0.94	0.9	Not_Removed	Not_Removed	Not_Removed	Not_Removed
406	1685.39	Bifidobacterium	breve	NA	1685	BR-07	27	27340092	PRJDB4597	SAMD00047597	GCF_001685725.1	BCXM00000000	Infant feces	WGS	Illumina	2249483	58.73	1964	NA	100	0.952	Good	Human, Homo sapiens	2016-07-09	2016-09-11 13:30:30	2016-09-11 13:30:30	1911	1869	kingdom	1	0.98	0	0	0	0.94	0.92	Not_Removed	Not_Removed	Not_Removed	Not_Removed
407	1685.4	Bifidobacterium	breve	NA	1685	BR-10	60	27340092	PRJDB4597	SAMD00047598	GCF_001685745.1	BCXN00000000	Infant feces	WGS	Illumina	2349925	58.78	2079	NA	100	0.935	Good	Human, Homo sapiens	2016-07-09	2016-09-11 13:38:25	2016-09-11 13:38:25	2027	1969	kingdom	1	0.97	0	0	0	0.94	0.91	Not_Removed	Not_Removed	Not_Removed	Not_Removed
408	1685.41	Bifidobacterium	breve	NA	1685	BR-14	57	27340092	PRJDB4597	SAMD00047599	GCF_001685765.1	BCXO00000000	Infant feces	WGS	Illumina	2529872	59.18	2343	NA	100	0.944	Good	Human, Homo sapiens	2016-07-09	2016-09-11 13:38:04	2016-09-11 13:38:04	2286	2158	kingdom	1	0.94	0	0	0	0.92	0.87	Not_Removed	Not_Removed	Not_Removed	Not_Removed
409	1685.42	Bifidobacterium	breve	NA	1685	BR-15	27	27340092	PRJDB4597	SAMD00047600	GCF_001685785.1	BCXP00000000	Infant feces	WGS	Illumina	2373802	58.68	2075	NA	100	0.944	Good	Human, Homo sapiens	2016-07-09	2016-09-11 13:36:07	2016-09-11 13:36:07	2024	1963	kingdom	1	0.97	0	0	0	0.94	0.92	Not_Removed	Not_Removed	Not_Removed	Not_Removed
410	1685.43	Bifidobacterium	breve	NA	1685	BR-19	15	27340092	PRJDB4597	SAMD00047601	GCF_001685805.1	BCXQ00000000	Infant feces	WGS	Illumina	2324995	58.62	2009	NA	100	0.944	Good	Human, Homo sapiens	2016-07-09	2016-09-11 13:30:31	2016-09-11 13:30:31	1958	1906	kingdom	1	0.97	0	0	0	0.94	0.91	Not_Removed	Not_Removed	Not_Removed	Not_Removed
411	1685.44	Bifidobacterium	breve	NA	1685	BR-20	52	27340092	PRJDB4597	SAMD00047602	GCF_001685825.1	BCXR00000000	Infant feces	WGS	Illumina	2335471	58.77	2031	NA	100	0.952	Good	Human, Homo sapiens	2016-07-09	2016-09-11 13:37:53	2016-09-11 13:37:53	1977	1921	kingdom	1	0.97	0	0	0	0.95	0.92	Not_Removed	Not_Removed	Not_Removed	Not_Removed
412	1685.45	Bifidobacterium	breve	NA	1685	BR-21	66	27340092	PRJDB4597	SAMD00047603	GCF_001685845.1	BCXS00000000	Infant feces	WGS	Illumina	2614621	59.16	2396	NA	100	0.952	Good	Human, Homo sapiens	2016-07-09	2016-09-11 13:43:38	2016-09-11 13:43:38	2362	2269	kingdom	1	0.96	0	0	0	0.94	0.9	Not_Removed	Not_Removed	Not_Removed	Not_Removed
413	1685.46	Bifidobacterium	breve	NA	1685	BR-C29	41	27340092	PRJDB4597	SAMD00047605	GCF_001685885.1	BCXU00000000	Infant feces	WGS	Illumina	2287657	58.86	2020	NA	100	0.952	Good	Human, Homo sapiens	2016-07-09	2016-09-11 13:44:09	2016-09-11 13:44:09	1989	1898	kingdom	1	0.95	0	0	0	0.94	0.89	Not_Removed	Not_Removed	Not_Removed	Not_Removed
414	1685.47	Bifidobacterium	breve	NA	1685	BR-H29	39	27340092	PRJDB4597	SAMD00047606	GCF_001685905.1	BCXV00000000	Infant feces	WGS	Illumina	2470837	59.25	2205	NA	100	0.952	Good	Human, Homo sapiens	2016-07-09	2016-09-11 13:47:21	2016-09-11 13:47:21	2152	2082	kingdom	1	0.97	0	0	0	0.94	0.91	Not_Removed	Not_Removed	Not_Removed	Not_Removed
415	1685.48	Bifidobacterium	breve	NA	1685	BR-I29	39	27340092	PRJDB4597	SAMD00047607	GCF_001685925.1	BCXW00000000	Infant feces	WGS	Illumina	2249921	58.69	1972	NA	100	0.952	Good	Human, Homo sapiens	2016-07-09	2016-09-11 13:45:10	2016-09-11 13:45:10	1923	1859	kingdom	1	0.97	0	0	0	0.94	0.91	Not_Removed	Not_Removed	Not_Removed	Not_Removed
416	1685.49	Bifidobacterium	breve	NA	1685	BR-L29	44	27340092	PRJDB4597	SAMD00047608	GCF_001685945.1	BCXX00000000	Infant feces	WGS	Illumina	2344657	59	2094	NA	100	0.952	Good	Human, Homo sapiens	2016-07-09	2016-09-11 13:47:53	2016-09-11 13:47:53	2039	1980	kingdom	1	0.97	0	0	0	0.94	0.91	Not_Removed	Not_Removed	Not_Removed	Not_Removed
417	1685.499	Bifidobacterium	breve	NA	1685	SC95	27	NA	PRJNA550109	SAMN12108292	GCA_006546585.1	VIBP00000000	Feces	WGS	Illumina	2331551	58.6668	2126	2052	NA	0.935	Good	Human, Homo sapiens	2019-07-02	2019-09-30 14:24:00	2019-09-30 14:24:00	1998	1936	kingdom	1	0.97	0	0	0	0.93	0.9	Not_Removed	Not_Removed	Not_Removed	Not_Removed
418	1685.5	Bifidobacterium	breve	NA	1685	INIA P734	50	NA	PRJEB32824	SAMEA5675151	GCA_901980275.1	CABFNK000000000	Milk	WGS	Unknown	2391925	58.8327	2142	2031	NA	0.935	Good	Human, Homo sapiens	2019-06-24	2019-10-03 00:00:34	2019-10-03 00:00:34	2085	2028	kingdom	1	0.97	0	0	0	0.94	0.91	Not_Removed	Not_Removed	Not_Removed	Not_Removed
419	1685.514	Bifidobacterium	breve	NA	1685	BIO6018	18	NA	PRJNA574342	SAMN12856546	GCA_008868405.1	WBNS00000000	Intestine	WGS	Illumina	2261339	58.8717	2070	2012	NA	0.952	Good	Human, Homo sapiens	2019-10-07	2019-10-27 20:56:06	2019-10-27 20:56:06	1965	1909	kingdom	1	0.97	0	0	0	0.94	0.91	Not_Removed	Not_Removed	Not_Removed	Not_Removed
420	1685.52	Bifidobacterium	breve	NA	1685	IDCC4401	1	NA	PRJNA579060	SAMN13091495	GCA_009429085.1	CP045532	Infant feces	Complete	Illumina|PacBio	2452339	58.7018	2224	2118	NA	0.952	Good	Human, Homo sapiens	2019-10-31	2019-11-25 11:50:25	2019-11-25 11:50:25	2084	2018	kingdom	1	0.97	0	0	0	0.93	0.9	Not_Removed	Not_Removed	Not_Removed	Not_Removed
421	1685.526	Bifidobacterium	breve	NA	1685	JR01	1	NA	PRJNA489428	SAMN09977286	GCA_009931415.1	CP040931	Feces	Complete	Oxford Nanopore	2304912	58.8701	2099	2005	NA	0.919	Good	Human, Homo sapiens	2020-01-27	2020-02-02 11:47:11	2020-02-02 11:47:11	1974	1933	kingdom	1	0.98	0	0	0	0.95	0.93	Not_Removed	Not_Removed	Not_Removed	Not_Removed
422	1685.55	Bifidobacterium	breve	NA	1685	Bifido_10	41	NA	PRJEB18553	SAMEA51822418	GCF_900157105.1	FTRL00000000	Infants	WGS	Unknown	2378038	58.5	2120	NA	100	0.952	Good	Human, Homo sapiens	2017-02-08	2017-03-20 09:21:29	2017-03-20 09:21:29	2068	2010	order	0.97	0.94	0.25	0.02	0.05	0.95	0.89	Not_Removed	Not_Removed	Not_Removed	Not_Removed
423	1685.56	Bifidobacterium	breve	NA	1685	Bifido_07	17	NA	PRJEB18553	SAMEA51820168	GCF_900157125.1	FTRK00000000	Infants	WGS	Unknown	2343874	58.8	2089	NA	100	0.952	Good	Human, Homo sapiens	2017-02-08	2017-03-20 09:21:36	2017-03-20 09:21:36	2032	1973	kingdom	1	0.97	0	0	0	0.93	0.91	Not_Removed	Not_Removed	Not_Removed	Not_Removed
424	1685.568	Bifidobacterium	breve	NA	1685	JTL	1	NA	PRJNA635210	SAMN15028705	GCA_013267755.1	CP053940	Infant feces	Complete	PacBio	2289549	58.5259	1947	NA	NA	0.952	Good	Human, Homo sapiens	2020-06-04	2020-07-01 03:49:05	2020-07-01 03:49:05	1898	1855	kingdom	1	0.98	0	0	0	0.95	0.92	Not_Removed	Not_Removed	Not_Removed	Not_Removed
425	1685.59	Bifidobacterium	breve	NA	1685	CECT7263	25	NA	PRJNA377846	SAMN06473336	GCA_002027265.1	MWVR00000000	Milk	WGS	Unknown	2330408	58.9	2069	1989	100	0.944	Good	Human, Homo sapiens	2017-03-14	2017-05-27 11:20:56	2017-05-27 11:20:56	1968	1919	kingdom	1	0.98	0	0	0	0.94	0.92	Not_Removed	Not_Removed	Not_Removed	Not_Removed
426	1685.595	Bifidobacterium	breve	NA	1685	142	69	NA	PRJNA551110	SAMN12139126		VIDR00000000	Infant feces	WGS	Illumina	2413974	58.5578	2206	2127	NA	0.952	Good	Human, Homo sapiens	1900-01-01	2020-11-28 23:45:51	2020-11-28 23:45:51	2091	2037	class	0.98	0.96	0.97	0.03	0.05	0.94	0.9	Removed	Not_Removed	Not_Removed	Removed
427	1685.596	Bifidobacterium	breve	NA	1685	UBG073	199	NA	PRJNA482729	SAMN09684644	GCA_014847835.1	RKEL00000000	Feces	WGS	Illumina	2309569	58.7566	2215	2133	NA	0.67	Good	Human, Homo sapiens	2020-10-05	2020-11-29 04:19:27	2020-11-29 04:19:27	2113	2033	kingdom	1	0.96	0	0	0	0.94	0.9	Not_Removed	Not_Removed	Not_Removed	Not_Removed
428	1685.597	Bifidobacterium	breve	NA	1685	BSD2780061688_150302_F6	5	NA	PRJNA637878	SAMN15532701		JADMWA000000000	Feces	WGS	Illumina	2318538	58.6994	2051	NA	NA	0.952	Good	Human, Homo sapiens	2020-11-17	2020-11-30 15:10:16	2020-11-30 15:10:16	1994	1936	kingdom	1	0.97	0	0	0	0.94	0.91	Not_Removed	Not_Removed	Not_Removed	Not_Removed
429	1685.598	Bifidobacterium	breve	NA	1685	1001270B_150601_B2	9	NA	PRJNA637878	SAMN15533280		JADNJI000000000	Feces	WGS	Illumina	2259724	58.5821	1938	NA	NA	0.952	Good	Human, Homo sapiens	2020-11-17	2020-11-30 16:05:29	2020-11-30 16:05:29	1889	1847	kingdom	1	0.98	0	0	0	0.95	0.92	Not_Removed	Not_Removed	Not_Removed	Not_Removed
430	1685.6	Bifidobacterium	breve	NA	1685	1900B	22	NA	PRJNA379831	SAMN06621718	GCA_002075865.1	NAPZ00000000	Infant feces	WGS	Unknown	2287865	58.59	1999	1910	100	0.952	Good	Human, Homo sapiens	2017-03-31	2017-05-28 05:56:53	2017-05-28 05:56:53	1945	1884	kingdom	1	0.97	0	0	0	0.94	0.91	Not_Removed	Not_Removed	Not_Removed	Not_Removed
431	1685.61	Bifidobacterium	breve	NA	1685	1891B	38	NA	PRJNA379831	SAMN06621711	GCA_002076055.1	NAQG00000000	Infant feces	WGS	Unknown	2418976	59.05	2225	2115	100	0.935	Good	Human, Homo sapiens	2017-03-31	2017-05-28 05:52:21	2017-05-28 05:52:21	2157	2098	kingdom	1	0.97	0	0	0	0.98	0.95	Not_Removed	Not_Removed	Not_Removed	Not_Removed
432	1685.61	Bifidobacterium	breve	NA	1685	BSD2780061687_150420_F12	30	NA	PRJNA637878	SAMN15533095		JADPEI010000010,JADPEI010000011,JADPEI010000012,JADPEI010000013,JADPEI010000014,JADPEI010000015,JADPEI010000016	Feces	WGS	Illumina	2398304	58.592	2158	NA	NA	0.944	Good	Human, Homo sapiens	2020-11-23	2021-01-02 05:43:50	2021-01-02 05:43:50	2098	2018	kingdom	1	0.96	0	0	0	0.93	0.89	Not_Removed	Not_Removed	Not_Removed	Not_Removed
433	1685.611	Bifidobacterium	breve	NA	1685	1001285H_161024_A11	24	NA	PRJNA637878	SAMN15533163		JADPFE010000010,JADPFE010000011,JADPFE010000012,JADPFE010000013,JADPFE010000014,JADPFE010000015,JADPFE010000016	Feces	WGS	Illumina	2307939	58.8017	2057	NA	NA	0.944	Good	Human, Homo sapiens	2020-11-23	2021-01-01 16:35:08	2021-01-01 16:35:08	2009	1947	kingdom	1	0.97	0	0	0	0.94	0.91	Not_Removed	Not_Removed	Not_Removed	Not_Removed
434	1685.612	Bifidobacterium	breve	NA	1685	1001287H_170206_A8	21	NA	PRJNA637878	SAMN15532833	GCA_015670155.1	JADPBI010000010,JADPBI010000011,JADPBI010000012,JADPBI010000013,JADPBI010000014,JADPBI010000015,JADPBI010000016	Feces	WGS	Illumina	2212213	58.7485	1885	NA	NA	0.911	Good	Human, Homo sapiens	2020-11-23	2021-01-01 16:41:19	2021-01-01 16:41:19	1848	1801	kingdom	1	0.97	0	0	0	0.95	0.92	Not_Removed	Not_Removed	Not_Removed	Not_Removed
435	1685.613	Bifidobacterium	breve	NA	1685	PRL2020	6	NA	PRJNA666301	SAMN16287677		JACZEM000000000	Feces	WGS	Illumina	2426298	59.0827	2207	2077	NA	0.944	Good	Human, Homo sapiens	1900-01-01	2021-02-01 06:01:22	2021-02-01 06:01:22	2126	2073	kingdom	1	0.98	0	0	0	0.98	0.96	Not_Removed	Not_Removed	Not_Removed	Not_Removed
436	1685.614	Bifidobacterium	breve	NA	1685	M1D	7	NA	PRJNA666301	SAMN16287678		JACZEL000000000	Feces	WGS	Illumina	2421612	59.061	2209	2073	NA	0.944	Good	Human, Homo sapiens	1900-01-01	2021-02-01 06:01:53	2021-02-01 06:01:53	2126	2075	kingdom	1	0.98	0	0	0	0.98	0.96	Not_Removed	Not_Removed	Not_Removed	Not_Removed
437	1685.62	Bifidobacterium	breve	NA	1685	1889B	22	NA	PRJNA379831	SAMN06621709	GCA_002076075.1	NAQI00000000	Infant feces	WGS	Unknown	2344818	58.79	2085	1972	100	0.944	Good	Human, Homo sapiens	2017-03-31	2017-05-28 05:58:34	2017-05-28 05:58:34	2019	1953	kingdom	1	0.97	0	0	0	0.94	0.91	Not_Removed	Not_Removed	Not_Removed	Not_Removed
438	1685.66	Bifidobacterium	breve	NA	1685	7E	17	28837128	PRJNA349793	SAMN05933031	GCA_002271275.1	MNLA00000000	Feces	WGS	Illumina	2270860	58.58	1951	1867	100	0.952	Good	Human, Homo sapiens	2017-08-28	2017-09-28 21:14:39	2017-09-28 21:14:39	1900	1857	kingdom	1	0.98	0	0	0	0.95	0.92	Not_Removed	Not_Removed	Not_Removed	Not_Removed
439	1685.73	Bifidobacterium	breve	NA	1685	DRBB26	1	NA	PRJNA384072	SAMN06827973	GCA_002838225.1	CP021390	Infants	Complete	PacBio	2396387	58.55	2102	1978	100	0.952	Good	Human, Homo sapiens	2017-12-13	2018-01-01 05:22:10	2018-01-01 05:22:10	2042	1994	kingdom	1	0.98	0	0	0	0.93	0.91	Not_Removed	Not_Removed	Not_Removed	Not_Removed
440	1685.74	Bifidobacterium	breve	NA	1685	NRBB01	1	NA	PRJNA384038	SAMN06827008	GCA_002838245.1	CP021384	NA	Complete	PacBio	2269404	58.89	2020	1902	100	0.952	Good	Human, Homo sapiens	2017-12-13	2018-01-01 05:21:31	2018-01-01 05:21:31	1958	1905	kingdom	1	0.97	0	0	0	0.94	0.91	Not_Removed	Not_Removed	Not_Removed	Not_Removed
441	1685.75	Bifidobacterium	breve	NA	1685	NRBB02	1	NA	PRJNA384042	SAMN06827019	GCA_002838265.1	CP021385	Infants	Complete	PacBio	2289884	58.59	2008	1872	100	0.944	Good	Human, Homo sapiens	2017-12-13	2018-01-01 05:22:07	2018-01-01 05:22:07	1937	1895	kingdom	1	0.98	0	0	0	0.95	0.93	Not_Removed	Not_Removed	Not_Removed	Not_Removed
442	1685.76	Bifidobacterium	breve	NA	1685	NRBB04	1	NA	PRJNA384043	SAMN06827050	GCA_002838285.1	CP021386	Infants	Complete	PacBio	2324647	58.71	2017	1873	100	0.952	Good	Human, Homo sapiens	2017-12-13	2018-01-01 05:21:49	2018-01-01 05:21:49	1960	1912	kingdom	1	0.98	0	0	0	0.94	0.91	Not_Removed	Not_Removed	Not_Removed	Not_Removed
443	1685.77	Bifidobacterium	breve	NA	1685	NRBB11	1	NA	PRJNA384046	SAMN06827081	GCA_002838305.1	CP021388	Infants	Complete	PacBio	2377562	58.72	2043	1916	100	0.952	Good	Human, Homo sapiens	2017-12-13	2018-01-01 05:22:31	2018-01-01 05:22:31	1982	1930	kingdom	1	0.97	0	0	0	0.95	0.92	Not_Removed	Not_Removed	Not_Removed	Not_Removed
444	1685.78	Bifidobacterium	breve	NA	1685	NRBB09	1	NA	PRJNA384044	SAMN06827067	GCA_002838325.1	CP021387	Infants	Complete	PacBio	2265557	58.69	1992	1881	100	0.919	Good	Human, Homo sapiens	2017-12-13	2018-01-01 05:22:13	2018-01-01 05:22:13	1948	1898	kingdom	1	0.97	0	0	0	0.95	0.92	Not_Removed	Not_Removed	Not_Removed	Not_Removed
445	1685.79	Bifidobacterium	breve	NA	1685	NRBB57	1	NA	PRJNA384069	SAMN06827912	GCA_002838345.1	CP021389	Infants	Complete	PacBio	2510381	59.38	2257	2125	100	0.944	Good	Human, Homo sapiens	2017-12-13	2018-01-01 05:23:19	2018-01-01 05:23:19	2186	2001	kingdom	1	0.92	0	0	0	0.92	0.84	Not_Removed	Not_Removed	Not_Removed	Not_Removed
446	1685.8	Bifidobacterium	breve	NA	1685	LMG 13208	31	25085493,25107967	PRJNA239841	SAMN02673429	GCF_000741125.1	JGYR00000000	Intestine	WGS	Ion Torrent	2263780	58.88	2041	1887	100	0.952	Good	Human, Homo sapiens	2014-08-18	2016-01-17 15:38:40	2016-01-17 15:38:40	1970	1913	kingdom	1	0.97	0	0	0	0.94	0.91	Not_Removed	Not_Removed	Not_Removed	Not_Removed
447	1685.8	Bifidobacterium	breve	NA	1685	NRBB50	1	NA	PRJNA384047	SAMN06827094	GCA_002838365.1	CP021391	Infants	Complete	PacBio	2409058	58.79	2157	2021	100	0.935	Good	Human, Homo sapiens	2017-12-13	2018-01-01 05:24:06	2018-01-01 05:24:06	2089	2027	kingdom	1	0.97	0	0	0	0.93	0.9	Not_Removed	Not_Removed	Not_Removed	Not_Removed
448	1685.81	Bifidobacterium	breve	NA	1685	NRBB52	1	NA	PRJNA384049	SAMN06827097	GCA_002838385.1	CP021393	Infants	Complete	PacBio	2379672	58.87	2116	1989	100	0.944	Good	Human, Homo sapiens	2017-12-13	2018-01-01 05:23:23	2018-01-01 05:23:23	2041	1980	kingdom	1	0.97	0	0	0	0.94	0.91	Not_Removed	Not_Removed	Not_Removed	Not_Removed
449	1685.82	Bifidobacterium	breve	NA	1685	NRBB51	1	NA	PRJNA384048	SAMN06827096	GCA_002838405.1	CP021392	Infants	Complete	PacBio	2402272	59.02	2077	1960	100	0.944	Good	Human, Homo sapiens	2017-12-13	2018-01-01 05:23:26	2018-01-01 05:23:26	2027	1988	kingdom	1	0.98	0	0	0	0.94	0.92	Not_Removed	Not_Removed	Not_Removed	Not_Removed
450	1685.83	Bifidobacterium	breve	NA	1685	NRBB56	1	NA	PRJNA384068	SAMN06827911	GCA_002838425.1	CP021394	Infants	Complete	PacBio	2425122	58.93	2123	1985	100	0.952	Good	Human, Homo sapiens	2017-12-13	2018-01-01 05:23:44	2018-01-01 05:23:44	2055	1995	kingdom	1	0.97	0	0	0	0.94	0.91	Not_Removed	Not_Removed	Not_Removed	Not_Removed
451	1685.84	Bifidobacterium	breve	NA	1685	DRBB27	1	NA	PRJNA384073	SAMN06827975	GCA_002838445.1	CP021552	Infants	Complete	PacBio	2435083	58.89	2208	2079	100	0.952	Good	Human, Homo sapiens	2017-12-13	2018-01-01 05:24:09	2018-01-01 05:24:09	2150	2064	kingdom	1	0.96	0	0	0	0.91	0.88	Not_Removed	Not_Removed	Not_Removed	Not_Removed
452	1685.85	Bifidobacterium	breve	NA	1685	017W439	1	NA	PRJNA384113	SAMN06828931	GCA_002838465.1	CP021554	Infants	Complete	PacBio	2301422	58.72	2039	1923	100	0.944	Good	Human, Homo sapiens	2017-12-13	2018-01-01 05:23:48	2018-01-01 05:23:48	1972	1928	kingdom	1	0.98	0	0	0	0.94	0.92	Not_Removed	Not_Removed	Not_Removed	Not_Removed
453	1685.86	Bifidobacterium	breve	NA	1685	215W447a	1	NA	PRJNA384129	SAMN06829004	GCA_002838485.1	CP021558	Infants	Complete	PacBio	2589602	59.29	2370	2219	100	0.944	Good	Human, Homo sapiens	2017-12-13	2018-01-01 05:25:09	2018-01-01 05:25:09	2274	2074	kingdom	1	0.91	0	0	0	0.92	0.84	Not_Removed	Not_Removed	Not_Removed	Not_Removed
454	1685.87	Bifidobacterium	breve	NA	1685	DRBB28	1	NA	PRJNA384074	SAMN06827976	GCA_002838505.1	CP021553	Infants	Complete	PacBio	2462170	58.97	2208	2096	100	0.935	Good	Human, Homo sapiens	2017-12-13	2018-01-01 05:25:06	2018-01-01 05:25:06	2158	2095	kingdom	1	0.97	0	0	0	0.94	0.91	Not_Removed	Not_Removed	Not_Removed	Not_Removed
455	1685.88	Bifidobacterium	breve	NA	1685	180W83	1	NA	PRJNA384128	SAMN06829003	GCA_002838525.1	CP021557	Infants	Complete	PacBio	2273173	58.84	2010	1891	100	0.944	Good	Human, Homo sapiens	2017-12-13	2018-01-01 05:24:42	2018-01-01 05:24:42	1944	1892	kingdom	1	0.97	0	0	0	0.94	0.92	Not_Removed	Not_Removed	Not_Removed	Not_Removed
456	1685.89	Bifidobacterium	breve	NA	1685	082W48	1	NA	PRJNA384114	SAMN06828932	GCA_002838545.1	CP021555	Infants	Complete	PacBio	2286339	58.82	1989	1885	100	0.944	Good	Human, Homo sapiens	2017-12-13	2018-01-01 05:24:57	2018-01-01 05:24:57	1937	1899	kingdom	1	0.98	0	0	0	0.95	0.93	Not_Removed	Not_Removed	Not_Removed	Not_Removed
457	1685.9	Bifidobacterium	breve	NA	1685	BBRI4	28	NA	PRJNA287203	SAMN03777307	GCF_001189355.1	LFII00000000	Infant feces	WGS	Illumina	2426720	58.72	2143	2067	100	0.935	Good	Human, Homo sapiens	2015-07-30	2016-01-17 16:42:05	2016-01-17 16:42:05	2091	2035	kingdom	1	0.97	0	0	0	0.93	0.91	Not_Removed	Not_Removed	Not_Removed	Not_Removed
458	1685.9	Bifidobacterium	breve	NA	1685	139W423	1	NA	PRJNA384124	SAMN06829002	GCA_002838565.1	CP021556	Infants	Complete	PacBio	2411276	58.65	2145	2013	100	0.952	Good	Human, Homo sapiens	2017-12-13	2018-01-01 05:24:45	2018-01-01 05:24:45	2075	2009	kingdom	1	0.97	0	0	0	0.93	0.9	Not_Removed	Not_Removed	Not_Removed	Not_Removed
459	1685.91	Bifidobacterium	breve	NA	1685	CNCM I-4321	1	NA	PRJNA384070	SAMN06827913	GCA_002838585.1	CP021559	Infants	Complete	PacBio	2464852	58.95	2234	2082	100	0.952	Good	Human, Homo sapiens	2017-12-13	2018-01-01 05:24:54	2018-01-01 05:24:54	2169	2094	kingdom	1	0.96	0	0	0	0.93	0.9	Not_Removed	Not_Removed	Not_Removed	Not_Removed
460	1685.92	Bifidobacterium	breve	NA	1685	infant	1	NA	PRJNA387666	SAMN07160576	GCA_002838605.1	CP023193	Infants	Complete	PacBio	2289686	58.59	2014	1874	100	0.944	Good	Human, Homo sapiens	2017-12-13	2018-01-01 05:24:51	2018-01-01 05:24:51	1938	1897	kingdom	1	0.98	0	0	0	0.95	0.93	Not_Removed	Not_Removed	Not_Removed	Not_Removed
461	1685.93	Bifidobacterium	breve	NA	1685	infant	1	NA	PRJNA387699	SAMN07160980	GCA_002838625.1	CP023194	Infants	Complete	PacBio	2289726	58.59	2024	1875	100	0.944	Good	Human, Homo sapiens	2017-12-13	2018-01-01 05:25:28	2018-01-01 05:25:28	1941	1900	kingdom	1	0.98	0	0	0	0.95	0.93	Not_Removed	Not_Removed	Not_Removed	Not_Removed
462	1685.94	Bifidobacterium	breve	NA	1685	infant	1	NA	PRJNA387670	SAMN07160580	GCA_002838645.1	CP023195	Infants	Complete	PacBio	2289892	58.59	2012	1875	100	0.944	Good	Human, Homo sapiens	2017-12-13	2018-01-01 05:24:48	2018-01-01 05:24:48	1937	1895	kingdom	1	0.98	0	0	0	0.95	0.93	Not_Removed	Not_Removed	Not_Removed	Not_Removed
463	1685.95	Bifidobacterium	breve	NA	1685	infant	1	NA	PRJNA387692	SAMN07160976	GCA_002838665.1	CP023196	Infants	Complete	PacBio	2289838	58.59	2013	1871	100	0.944	Good	Human, Homo sapiens	2017-12-13	2018-01-01 05:26:10	2018-01-01 05:26:10	1939	1896	kingdom	1	0.98	0	0	0	0.95	0.93	Not_Removed	Not_Removed	Not_Removed	Not_Removed
464	1685.96	Bifidobacterium	breve	NA	1685	infant	1	NA	PRJNA387696	SAMN07160977	GCA_002838685.1	CP023197	Infants	Complete	PacBio	2289791	58.59	2011	1869	100	0.944	Good	Human, Homo sapiens	2017-12-13	2018-01-01 05:26:18	2018-01-01 05:26:18	1937	1895	kingdom	1	0.98	0	0	0	0.95	0.93	Not_Removed	Not_Removed	Not_Removed	Not_Removed
465	1685.97	Bifidobacterium	breve	NA	1685	infant	1	NA	PRJNA387697	SAMN07160978	GCA_002838705.1	CP023198	Infants	Complete	PacBio	2435086	58.89	2208	2084	100	0.952	Good	Human, Homo sapiens	2017-12-13	2018-01-01 05:25:51	2018-01-01 05:25:51	2149	2063	kingdom	1	0.96	0	0	0	0.91	0.88	Not_Removed	Not_Removed	Not_Removed	Not_Removed
466	1685.98	Bifidobacterium	breve	NA	1685	infant	1	NA	PRJNA387698	SAMN07160979	GCA_002838725.1	CP023199	Infants	Complete	PacBio	2471118	58.95	2227	2098	100	0.952	Good	Human, Homo sapiens	2017-12-13	2018-01-01 05:26:21	2018-01-01 05:26:21	2166	2091	kingdom	1	0.96	0	0	0	0.93	0.9	Not_Removed	Not_Removed	Not_Removed	Not_Removed
467	1685.99	Bifidobacterium	breve	NA	1685	infant	1	NA	PRJNA387665	SAMN07160574	GCA_002838745.1	CP023192	Infants	Complete	PacBio	2289759	58.59	2018	1875	100	0.935	Good	Human, Homo sapiens	2017-12-13	2018-01-01 05:27:20	2018-01-01 05:27:20	1940	1899	kingdom	1	0.98	0	0	0	0.95	0.93	Not_Removed	Not_Removed	Not_Removed	Not_Removed
468	1686.201	Bifidobacterium	catenulatum	NA	1686	BIOML-A2	18	31477907	PRJNA544527	SAMN11944618	GCA_009160765.1	WDPB00000000	Feces	WGS	Illumina	2019792	56.1499	1772	1663	NA	0.96	Good	Human, Homo sapiens	2019-10-16	2019-10-28 01:49:45	2019-10-28 01:49:45	1668	1625	kingdom	1	0.97	0	0	0	0.93	0.91	Not_Removed	Not_Removed	Not_Removed	Not_Removed
469	1686.202	Bifidobacterium	catenulatum	NA	1686	BIOML-A1	18	31477907	PRJNA544527	SAMN11944617	GCA_009160805.1	WDPA00000000	Feces	WGS	Illumina	2064836	56.2121	1862	1737	NA	0.96	Good	Human, Homo sapiens	2019-10-16	2019-10-28 01:50:19	2019-10-28 01:50:19	1744	1683	kingdom	1	0.96	0	0	0	0.92	0.89	Not_Removed	Not_Removed	Not_Removed	Not_Removed
470	1686.206	Bifidobacterium	catenulatum	NA	1686	BSD2780120875_150330_A3	16	NA	PRJNA637878	SAMN15533237		JADMXZ010000010,JADMXZ010000011,JADMXZ010000012,JADMXZ010000013,JADMXZ010000014,JADMXZ010000015,JADMXZ010000016	Feces	WGS	Illumina	2153693	56.3602	1935	NA	NA	0.96	Good	Human, Homo sapiens	2020-11-17	2020-11-30 15:16:55	2020-11-30 15:16:55	1830	1736	kingdom	1	0.95	0	0	0	0.92	0.87	Not_Removed	Not_Removed	Not_Removed	Not_Removed
471	1686.6	Bifidobacterium	catenulatum	NA	1686	1899B	14	NA	PRJNA379831	SAMN06621717	GCA_002075855.1	NAQA00000000	Infant feces	WGS	Unknown	2124599	56.25	1861	1749	100	0.96	Good	Human, Homo sapiens	2017-03-31	2017-05-28 06:10:18	2017-05-28 06:10:18	1763	1713	kingdom	1	0.97	0	0	0	0.94	0.91	Not_Removed	Not_Removed	Not_Removed	Not_Removed
472	1689.109	Bifidobacterium	dentium	NA	1689	UT_Austin_Bifido_FMT_C3	33	NA	PRJNA622788	SAMN14529804		JAAWWN000000000	Feces	WGS	Ion Torrent	2539231	58.4851	2275	NA	NA	0.944	Good	Human, Homo sapiens	2020-04-15	2020-04-26 16:08:17	2020-04-26 16:08:17	2188	2111	kingdom	1	0.96	0	0	0	0.96	0.92	Not_Removed	Not_Removed	Not_Removed	Not_Removed
473	1689.11	Bifidobacterium	dentium	NA	1689	UT_Austin_Bifido_FMT_C1	29	NA	PRJNA622788	SAMN14529726		JAAWWM000000000	Feces	WGS	Ion Torrent	2538385	58.4885	2248	NA	NA	0.935	Good	Human, Homo sapiens	2020-04-15	2020-04-26 16:16:41	2020-04-26 16:16:41	2166	2089	kingdom	1	0.96	0	0	0	0.96	0.92	Not_Removed	Not_Removed	Not_Removed	Not_Removed
474	1689.112	Bifidobacterium	dentium	NA	1689	1001270B_150601_C3	18	NA	PRJNA637878	SAMN15532764		JADNJU010000010,JADNJU010000011,JADNJU010000012,JADNJU010000013,JADNJU010000014,JADNJU010000015,JADNJU010000016	Feces	WGS	Illumina	2543894	58.3862	2148	NA	NA	0.96	Good	Human, Homo sapiens	2020-11-17	2020-11-30 16:07:17	2020-11-30 16:07:17	2079	1998	kingdom	1	0.96	0	0	0	0.94	0.91	Not_Removed	Not_Removed	Not_Removed	Not_Removed
475	1689.113	Bifidobacterium	dentium	NA	1689	BSD2780061688_150302_D2	23	NA	PRJNA637878	SAMN15533055		JADMPY010000010,JADMPY010000011,JADMPY010000012,JADMPY010000013,JADMPY010000014,JADMPY010000015,JADMPY010000016	Feces	WGS	Illumina	2575310	58.3356	2178	NA	NA	0.96	Good	Human, Homo sapiens	2020-11-17	2020-11-30 16:47:30	2020-11-30 16:47:30	2099	2030	kingdom	1	0.97	0	0	0	0.95	0.92	Not_Removed	Not_Removed	Not_Removed	Not_Removed
476	1689.121	Bifidobacterium	dentium	NA	1689	898B	24	33152994	PRJNA666310	SAMN16287911		JACZDH000000000	Intestine	WGS	Illumina	2459079	58.4907	2082	1940	NA	0.96	Good	Human, Homo sapiens	2020-11-30	2021-01-02 05:43:50	2021-01-02 05:43:50	2002	1954	kingdom	1	0.98	0	0	0	0.96	0.94	Not_Removed	Not_Removed	Not_Removed	Not_Removed
477	1689.122	Bifidobacterium	dentium	NA	1689	924B	15	33152994	PRJNA666310	SAMN16287912		JACZED000000000	Intestine	WGS	Illumina	2456361	58.4992	2079	1934	NA	0.96	Good	Human, Homo sapiens	2020-11-30	2021-01-01 17:26:23	2021-01-01 17:26:23	2005	1952	kingdom	1	0.97	0	0	0	0.96	0.94	Not_Removed	Not_Removed	Not_Removed	Not_Removed
478	1689.123	Bifidobacterium	dentium	NA	1689	848B	21	33152994	PRJNA666310	SAMN16287910		JACZDI000000000	Intestine	WGS	Illumina	2582570	58.3513	2203	2072	NA	0.96	Good	Human, Homo sapiens	2020-11-30	2021-01-02 05:43:50	2021-01-02 05:43:50	2112	2044	kingdom	1	0.97	0	0	0	0.95	0.92	Not_Removed	Not_Removed	Not_Removed	Not_Removed
479	1689.124	Bifidobacterium	dentium	NA	1689	841B	25	33152994	PRJNA666310	SAMN16287909		JACZDJ000000000	Intestine	WGS	Illumina	2580247	58.3783	2205	2069	NA	0.96	Good	Human, Homo sapiens	2020-11-30	2021-01-01 17:30:17	2021-01-01 17:30:17	2111	2040	kingdom	1	0.97	0	0	0	0.95	0.92	Not_Removed	Not_Removed	Not_Removed	Not_Removed
480	1689.125	Bifidobacterium	dentium	NA	1689	831B	14	33152994	PRJNA666310	SAMN16287908		JACZDK000000000	Intestine	WGS	Illumina	2479317	58.3835	2114	1983	NA	0.96	Good	Human, Homo sapiens	2020-11-30	2021-01-01 17:28:53	2021-01-01 17:28:53	2040	1975	kingdom	1	0.97	0	0	0	0.95	0.92	Not_Removed	Not_Removed	Not_Removed	Not_Removed
481	1689.126	Bifidobacterium	dentium	NA	1689	793B	19	33152994	PRJNA666310	SAMN16287907		JACZDL000000000	Intestine	WGS	Illumina	2605010	58.7005	2335	2164	NA	0.96	Good	Human, Homo sapiens	2020-11-30	2021-01-01 17:29:38	2021-01-01 17:29:38	2240	2137	kingdom	1	0.95	0	0	0	0.94	0.89	Not_Removed	Not_Removed	Not_Removed	Not_Removed
482	1689.127	Bifidobacterium	dentium	NA	1689	679B	15	33152994	PRJNA666310	SAMN16287906		JACZDM000000000	Intestine	WGS	Illumina	2697950	58.4589	2382	2239	NA	0.96	Good	Human, Homo sapiens	2020-11-30	2021-01-01 17:29:50	2021-01-01 17:29:50	2291	2166	kingdom	1	0.95	0	0	0	0.94	0.89	Not_Removed	Not_Removed	Not_Removed	Not_Removed
483	1689.128	Bifidobacterium	dentium	NA	1689	181B	10	33152994	PRJNA666310	SAMN16287905		JACZDN000000000	Intestine	WGS	Illumina	2523858	58.4464	2183	2049	NA	0.96	Good	Human, Homo sapiens	2020-11-30	2021-01-01 17:28:52	2021-01-01 17:28:52	2092	2028	kingdom	1	0.97	0	0	0	0.95	0.92	Not_Removed	Not_Removed	Not_Removed	Not_Removed
484	1689.18	Bifidobacterium	dentium	NA	1689	NCTC11816	1	NA	PRJEB6403	SAMEA4076722	GCA_900637175.1	LR134349	Others	Complete	Unknown	2635828	58.539	2240	2138	NA	0.96	Good	Human, Homo sapiens	2018-12-19	2019-02-01 13:50:49	2019-02-01 13:50:49	2155	2101	kingdom	1	0.97	0	0	0	0.98	0.96	Not_Removed	Not_Removed	Not_Removed	Not_Removed
485	1689.6	Bifidobacterium	dentium	NA	1689	DE-29	26	27340092	PRJDB4597	SAMD00047615	GCF_001686085.1	BCYE00000000	Infant feces	WGS	Illumina	2552693	58.53	2210	NA	100	0.96	Good	Human, Homo sapiens	2016-07-09	2016-09-11 14:09:31	2016-09-11 14:09:31	2114	2048	kingdom	1	0.97	0	0	0	0.95	0.92	Not_Removed	Not_Removed	Not_Removed	Not_Removed
486	1689.8	Bifidobacterium	dentium	NA	1689	cx_0004	19	30630933	PRJNA496358	SAMN10239586	GCA_004167735.1	RCXJ00000000	Feces	WGS	Illumina	2589878	58.458	2277	2160	NA	0.96	Good	Human, Homo sapiens	2019-02-11	2019-07-16 17:33:32	2019-07-16 17:33:32	2142	2067	kingdom	1	0.96	0	0	0	0.95	0.91	Not_Removed	Not_Removed	Not_Removed	Not_Removed
487	1689.81	Bifidobacterium	dentium	NA	1689	ATCC 15424	21	NA	PRJNA529663	SAMN11280666	GCA_004683745.1	SQQK00000000	Others	WGS	Illumina	2625535	58.4768	2301	2197	NA	0.96	Good	Human, Homo sapiens	2019-04-05	2019-07-16 17:36:23	2019-07-16 17:36:23	2203	2110	kingdom	1	0.96	0	0	0	0.95	0.91	Not_Removed	Not_Removed	Not_Removed	Not_Removed
488	1689.9	Bifidobacterium	dentium	NA	1689	1893B	24	NA	PRJNA379831	SAMN06621713	GCA_002075955.1	NAQE00000000	Infant feces	WGS	Unknown	2571068	58.22	2177	2070	99.4	0.96	Good	Human, Homo sapiens	2017-03-31	2017-05-28 05:59:04	2017-05-28 05:59:04	2092	2029	kingdom	1	0.97	0	0	0	0.95	0.92	Not_Removed	Not_Removed	Not_Removed	Not_Removed
489	1689.9	Bifidobacterium	dentium	NA	1689	BIOML-A3	13	31477907	PRJNA544527	SAMN11944621	GCA_009160675.1	WDPE00000000	Feces	WGS	Illumina	2590214	58.4576	2279	2156	NA	0.952	Good	Human, Homo sapiens	2019-10-16	2019-10-28 01:49:35	2019-10-28 01:49:35	2140	2065	kingdom	1	0.96	0	0	0	0.95	0.91	Not_Removed	Not_Removed	Not_Removed	Not_Removed
490	1689.91	Bifidobacterium	dentium	NA	1689	BIOML-A1	88	31477907	PRJNA544527	SAMN11944619	GCA_009160725.1	WDPC00000000	Feces	WGS	Illumina	2752113	58.2161	2479	2339	NA	0.959	Good	Human, Homo sapiens	2019-10-16	2019-10-28 01:49:57	2019-10-28 01:49:57	2328	2245	kingdom	1	0.96	0	0	0	0.95	0.91	Not_Removed	Not_Removed	Not_Removed	Not_Removed
491	1689.92	Bifidobacterium	dentium	NA	1689	BIOML-A2	100	31477907	PRJNA544527	SAMN11944620	GCA_009160735.1	WDPD00000000	Feces	WGS	Illumina	2868671	58.0911	2587	2431	NA	0.951	Good	Human, Homo sapiens	2019-10-16	2019-10-28 01:50:23	2019-10-28 01:50:23	2428	2348	kingdom	1	0.97	0	0	0	0.95	0.91	Not_Removed	Not_Removed	Not_Removed	Not_Removed
492	1694.11	Bifidobacterium	pseudolongum	NA	1694	AF13-3LB	15	NA	PRJNA482748	SAMN09734239	GCA_003464845.1	QRZV00000000	Feces	WGS	Illumina	2215443	63.0122	1936	1844	100	0.944	Good	Human, Homo sapiens	2018-09-06	2018-10-02 11:06:35	2018-10-02 11:06:35	1884	1760	kingdom	1	0.93	0	0	0	0.91	0.85	Not_Removed	Not_Removed	Not_Removed	Not_Removed
493	1695.19	Bifidobacterium	longum	subsp. suis	1695	209B	23	NA	PRJNA692178	SAMN17315593		JAERWE000000000	Feces	WGS	Illumina	2300337	60.0812	2041	1912	NA	0.944	Good	Human, Homo sapiens	1900-01-01	2021-02-01 08:12:01	2021-02-01 08:12:01	1950	1897	kingdom	1	0.97	0	0	0	0.92	0.9	Not_Removed	Not_Removed	Not_Removed	Not_Removed
494	1695.4	Bifidobacterium	longum	subsp. suis	1695	BSM11-5	45	27782805	PRJNA339033	SAMN05578880	GCF_001870705.1	MOAE00000000	Infant feces	WGS	Illumina	2602875	59.87	2301	2132	100	0.952	Good	Human, Homo sapiens	2016-11-07	2016-11-19 11:24:13	2016-11-19 11:24:13	2192	2114	kingdom	1	0.96	0	0	0	0.91	0.87	Not_Removed	Not_Removed	Not_Removed	Not_Removed
495	2013020.3	Bifidobacterium	sp.	NA	2013020	N4G05	12	28552417	PRJNA387952	SAMN07189853	GCA_002742445.1	NJNQ00000000	Vagina	WGS	Illumina	2069141	56.05	1798	1677	100	0.96	Good	Human, Homo sapiens	2017-11-02	2017-11-26 21:41:50	2017-11-26 21:41:50	1684	1635	kingdom	1	0.97	0	0	0	0.94	0.91	Not_Removed	Not_Removed	Not_Removed	Not_Removed	B. kashiwanohense
496	2013021.3	Bifidobacterium	sp.	NA	2013021	N5G01	8	28552417	PRJNA387952	SAMN07189854	GCA_002742425.1	NJNP00000000	Vagina	WGS	Illumina	2121628	56.18	1821	1702	100	0.96	Good	Human, Homo sapiens	2017-11-02	2017-11-26 21:43:03	2017-11-26 21:43:03	1721	1665	kingdom	1	0.97	0	0	0	0.93	0.9	Not_Removed	Not_Removed	Not_Removed	Not_Removed	B. kashiwanohense
497	206672.9	Bifidobacterium	longum	NA	206672	NCC2705	2	12381787	PRJNA328	SAMN02603675	GCA_000007525.1	AE014295,AF540971	Infant feces	Complete	Unknown	2260266	60.1	1868	1729	100	0.944	Good	Human, Homo sapiens	2002-10-17	2014-12-08 22:10:28	2015-03-16 03:17:09	1852	1814	kingdom	1	0.98	0	0	0	0.97	0.95	Not_Removed	Not_Removed	Not_Removed	Not_Removed	B. longum subsp. longum
498	216816.111	Bifidobacterium	longum	NA	216816	BXY01	1	NA	PRJNA251950	SAMN02843216	GCF_000730205.1	CP008885	Intestine	Complete	Roche 454|Illumina	2480603	59.82	2150	1901	100	0.952	Good	Human, Homo sapiens	2014-07-17	2016-01-17 15:37:40	2016-01-17 15:37:40	2052	1984	kingdom	1	0.97	0	0	0	0.92	0.89	Not_Removed	Not_Removed	Not_Removed	Not_Removed	B. longum subsp. longum
499	216816.112	Bifidobacterium	longum	NA	216816	1173_BLON	30	NA	PRJNA267549	SAMN03197130	GCF_001053985.1	JWAI00000000	NA	WGS	Illumina	1792971	46.85	1569	NA	97.2	0.944	Good	Human, Homo sapiens	2015-07-10	2016-01-17 16:13:37	2016-01-17 16:13:37	1517	1472	kingdom	1	0.97	0	0	0	0.96	0.93	Not_Removed	Not_Removed	Removed	Removed
500	216816.113	Bifidobacterium	longum	NA	216816	981_BLON	150	NA	PRJNA267549	SAMN03198202	GCF_001059475.1	JULC00000000	NA	WGS	Illumina	3121288	64.76	2707	NA	100	0.952	Good	Human, Homo sapiens	2015-07-10	2016-01-17 16:15:15	2016-01-17 16:15:15	2590	2488	kingdom	1	0.96	0	0	0	0.95	0.91	Not_Removed	Not_Removed	Removed	Removed
501	216816.114	Bifidobacterium	longum	NA	216816	BG7	2	NA	PRJNA270904	SAMN03271682	GCA_001293145.1	CP010453,CP010454	Feces	Complete	PacBio	2455762	60.01	2091	2052	100	0.944	Good	Human, Homo sapiens	2015-09-17	2016-01-17 17:09:33	2016-01-17 17:09:33	2017	1968	kingdom	1	0.98	0	0	0	0.94	0.91	Not_Removed	Not_Removed	Not_Removed	Not_Removed	B. longum subsp. longum
502	216816.115	Bifidobacterium	longum	NA	216816	CMW7750	39	NA	PRJNA272123	SAMN03842222	GCF_001546275.1	LRPQ00000000	Vagina	WGS	Illumina	2372082	59.95	2191	2196	100	0.935	Good	Human, Homo sapiens	2016-02-02	2016-03-01 04:57:33	2016-03-01 04:57:33	1987	1919	kingdom	1	0.97	0	0	0	0.93	0.9	Not_Removed	Not_Removed	Not_Removed	Not_Removed	B. longum subsp. longum
503	216816.116	Bifidobacterium	longum	NA	216816	121.2	234	NA	PRJNA272371	SAMN04497913	GCA_001576955.1	LSUK00000000	Infant feces	WGS	Roche 454|Illumina	1872563	60.26	1726	1609	98.6	0.903	Good	Human, Homo sapiens	2016-02-29	2016-03-18 09:12:53	2016-03-18 09:12:53	1668	1626	kingdom	1	0.97	0	0	0	0.96	0.94	Not_Removed	Not_Removed	Not_Removed	Not_Removed	B. longum subsp. longum
504	216816.117	Bifidobacterium	longum	NA	216816	379	24	NA	PRJNA298113	SAMN04155602	GCF_001595465.1	LKUQ00000000	Intestine	WGS	Illumina	2387620	60.2	2089	1934	100	0.944	Good	Human, Homo sapiens	2016-03-21	2016-04-27 18:26:45	2016-04-27 18:26:45	2022	1869	kingdom	1	0.92	0	0	0	0.92	0.85	Not_Removed	Not_Removed	Not_Removed	Not_Removed	B. longum subsp. longum
505	216816.126	Bifidobacterium	longum	NA	216816	35624	1	NA	PRJNA301703	SAMN04254466	GCF_001719085.1	CP013673	NA	Complete	Roche 454	2264056	60	1913	1733	100	0.944	Good	Human, Homo sapiens	2016-09-06	2016-11-15 22:08:41	2016-11-15 22:08:41	1854	1809	kingdom	1	0.98	0	0	0	0.94	0.92	Not_Removed	Not_Removed	Not_Removed	Not_Removed	B. longum subsp. longum
506	216816.130	Bifidobacterium	longum	NA	216816	Bifido_09	68	NA	PRJEB18553	SAMEA51821668	GCF_900157055.1	FTRF00000000	Infants	WGS	Unknown	2661241	59.93	2436	NA	100	0.944	Good	Human, Homo sapiens	2017-02-08	2017-03-20 09:21:35	2017-03-20 09:21:35	2321	2108	kingdom	1	0.91	0	0	0	0.89	0.81	Not_Removed	Not_Removed	Not_Removed	Not_Removed	B. longum subsp. longum
507	216816.131	Bifidobacterium	longum	NA	216816	PC1	83	NA	PRJEB18553	SAMEA51825418	GCF_900157065.1	FTRN00000000	Infants	WGS	Unknown	2794568	59.82	2759	NA	100	0.944	Good	Human, Homo sapiens	2017-02-08	2017-03-20 09:21:01	2017-03-20 09:21:01	2606	2320	phylum	0.99	0.88	0.25	0.03	0.07	0.86	0.76	Not_Removed	Not_Removed	Not_Removed	Not_Removed	B. longum subsp. infantis
508	216816.132	Bifidobacterium	longum	NA	216816	Bifido_S1	81	NA	PRJEB18553	SAMEA51824668	GCF_900157075.1	FTRM00000000	Infants	WGS	Unknown	2812033	59.7	2769	NA	100	0.944	Good	Human, Homo sapiens	2017-02-08	2017-03-20 09:21:11	2017-03-20 09:21:11	2627	2345	phylum	0.98	0.88	0.19	0.04	0.08	0.86	0.75	Not_Removed	Not_Removed	Not_Removed	Not_Removed	B. longum subsp. infantis
509	216816.133	Bifidobacterium	longum	NA	216816	Bifido_04	48	NA	PRJEB18553	SAMEA51817918	GCF_900157085.1	FTRG00000000	Infants	WGS	Unknown	2579388	59.73	2440	NA	100	0.952	Good	Human, Homo sapiens	2017-02-08	2017-03-20 09:22:02	2017-03-20 09:22:02	2293	2154	phylum	0.99	0.93	0.06	0.04	0.08	0.88	0.82	Not_Removed	Not_Removed	Not_Removed	Not_Removed	B. longum subsp. infantis
510	216816.134	Bifidobacterium	longum	NA	216816	Bifido_01	39	NA	PRJEB18553	SAMEA51815668	GCF_900157095.1	FTRH00000000	Infants	WGS	Unknown	2334627	59.94	2032	NA	100	0.944	Good	Human, Homo sapiens	2017-02-08	2017-03-20 09:21:19	2017-03-20 09:21:19	1970	1908	kingdom	1	0.97	0	0	0	0.94	0.91	Not_Removed	Not_Removed	Not_Removed	Not_Removed	B. longum subsp. longum
511	216816.135	Bifidobacterium	longum	NA	216816	Bifido_05	88	NA	PRJEB18553	SAMEA51818668	GCF_900157115.1	FTRJ00000000	Infants	WGS	Unknown	2334740	59.88	2077	NA	100	0.944	Good	Human, Homo sapiens	2017-02-08	2017-03-20 09:21:33	2017-03-20 09:21:33	2012	1931	phylum	1	0.96	0.39	0.02	0.04	0.93	0.89	Not_Removed	Not_Removed	Not_Removed	Not_Removed	B. longum subsp. longum
512	216816.136	Bifidobacterium	longum	NA	216816	Bifido_03	82	NA	PRJEB18553	SAMEA51817168	GCF_900157145.1	FTRI00000000	Infants	WGS	Unknown	2413630	60.09	2157	NA	100	0.935	Good	Human, Homo sapiens	2017-02-08	2017-03-20 09:21:54	2017-03-20 09:21:54	2071	1976	kingdom	1	0.95	0	0	0	0.92	0.88	Not_Removed	Not_Removed	Not_Removed	Not_Removed	B. longum subsp. longum
513	216816.137	Bifidobacterium	longum	NA	216816	Bifido_06	48	NA	PRJEB18553	SAMEA51819418	GCF_900157155.1	FTRO00000000	Infants	WGS	Unknown	2421822	59.99	2170	NA	100	0.944	Good	Human, Homo sapiens	2017-02-08	2017-03-20 09:21:51	2017-03-20 09:21:51	2099	2014	kingdom	1	0.96	0	0	0	0.92	0.88	Not_Removed	Not_Removed	Not_Removed	Not_Removed	B. longum subsp. longum
514	216816.139	Bifidobacterium	longum	NA	216816	PC4	69	NA	PRJEB18553	SAMEA51826168	GCF_900157185.1	FTRR00000000	Infants	WGS	Unknown	2788991	59.81	2753	NA	100	0.944	Good	Human, Homo sapiens	2017-02-08	2017-03-20 09:21:28	2017-03-20 09:21:28	2587	2309	phylum	0.99	0.89	0.19	0.04	0.07	0.86	0.76	Not_Removed	Not_Removed	Not_Removed	Not_Removed	B. longum subsp. infantis
515	216816.140	Bifidobacterium	longum	NA	216816	Bifido_02	97	NA	PRJEB18553	SAMEA51816418	GCF_900157195.1	FTRQ00000000	Infants	WGS	Unknown	2334287	60.1	2037	NA	100	0.944	Good	Human, Homo sapiens	2017-02-08	2017-03-20 09:21:52	2017-03-20 09:21:52	1991	1938	kingdom	1	0.97	0	0	0	0.94	0.91	Not_Removed	Not_Removed	Not_Removed	Not_Removed	B. longum subsp. longum
516	216816.143	Bifidobacterium	longum	NA	216816	1898B	41	NA	PRJNA379831	SAMN06621716	GCA_002075875.1	NAQB00000000	Infant feces	WGS	Unknown	2474386	59.92	2159	2049	100	0.944	Good	Human, Homo sapiens	2017-03-31	2017-05-28 05:49:25	2017-05-28 05:49:25	2100	2032	kingdom	1	0.97	0	0	0	0.93	0.9	Not_Removed	Not_Removed	Not_Removed	Not_Removed	B. longum subsp. longum
517	216816.144	Bifidobacterium	longum	NA	216816	1897B	55	NA	PRJNA379831	SAMN06621715	GCA_002075935.1	NAQC00000000	Milk	WGS	Unknown	2453605	59.9	2275	2143	100	0.944	Good	Human, Homo sapiens	2017-03-31	2017-05-28 06:06:06	2017-05-28 06:06:06	2192	2072	kingdom	1	0.95	0	0	0	0.89	0.84	Not_Removed	Not_Removed	Not_Removed	Not_Removed	B. longum subsp. longum
518	216816.145	Bifidobacterium	longum	NA	216816	1890B	109	NA	PRJNA379831	SAMN06621710	GCA_002076015.1	NAQH00000000	Infant feces	WGS	Unknown	2341670	59.9	2078	1954	100	0.944	Good	Human, Homo sapiens	2017-03-31	2017-05-28 06:02:12	2017-05-28 06:02:12	2021	1960	kingdom	1	0.97	0	0	0	0.94	0.91	Not_Removed	Not_Removed	Not_Removed	Not_Removed	B. longum subsp. longum
519	216816.146	Bifidobacterium	longum	NA	216816	1886B	47	NA	PRJNA379831	SAMN06621706	GCA_002076095.1	NAQL00000000	Milk	WGS	Unknown	2473746	60.22	2251	2137	100	0.935	Good	Human, Homo sapiens	2017-03-31	2017-05-28 06:08:36	2017-05-28 06:08:36	2176	2031	kingdom	1	0.93	0	0	0	0.92	0.86	Not_Removed	Not_Removed	Not_Removed	Not_Removed	B. longum subsp. longum
520	216816.147	Bifidobacterium	longum	NA	216816	Indica	43	NA	PRJNA398177	SAMN07503177	GCA_002276185.1	NQMV00000000	Feces	WGS	Roche 454	2374227	59.99	2142	2060	100	0.944	Good	Human, Homo sapiens	2017-08-29	2017-09-28 21:26:36	2017-09-28 21:26:36	2031	1950	kingdom	1	0.96	0	0	0	0.93	0.89	Not_Removed	Not_Removed	Not_Removed	Not_Removed	B. longum subsp. longum
521	216816.167	Bifidobacterium	longum	NA	216816	DPC6317	20	NA	PRJNA394834	SAMN07958363	GCA_002832945.1	PJDQ00000000	Feces	WGS	Illumina	2448630	60.22	2097	1987	100	0.944	Good	Human, Homo sapiens	2017-12-11	2018-01-01 04:35:17	2018-01-01 04:35:17	2033	1964	kingdom	1	0.97	0	0	0	0.92	0.89	Not_Removed	Not_Removed	Not_Removed	Not_Removed	B. longum subsp. longum
522	216816.168	Bifidobacterium	longum	NA	216816	APC1504	51	NA	PRJNA394834	SAMN07958361	GCA_002832955.1	PJDS00000000	Feces	WGS	Illumina	2310288	60.21	1998	1883	100	0.944	Good	Human, Homo sapiens	2017-12-11	2018-01-01 04:35:35	2018-01-01 04:35:35	1954	1898	kingdom	1	0.97	0	0	0	0.93	0.91	Not_Removed	Not_Removed	Not_Removed	Not_Removed	B. longum subsp. longum
523	216816.169	Bifidobacterium	longum	NA	216816	APC1503	39	NA	PRJNA394834	SAMN07958360	GCA_002832985.1	PJDT00000000	Feces	WGS	Illumina	2562703	59.7	2306	2189	100	0.944	Good	Human, Homo sapiens	2017-12-11	2018-01-01 04:35:59	2018-01-01 04:35:59	2234	2041	kingdom	1	0.91	0	0	0	0.9	0.83	Not_Removed	Not_Removed	Not_Removed	Not_Removed	B. longum subsp. longum
524	216816.170	Bifidobacterium	longum	NA	216816	DPC6321	28	NA	PRJNA394834	SAMN07958365	GCA_002832995.1	PJDO00000000	Feces	WGS	Illumina	2382360	59.89	2052	1941	100	0.944	Good	Human, Homo sapiens	2017-12-11	2018-01-01 04:35:38	2018-01-01 04:35:38	1990	1912	kingdom	1	0.96	0	0	0	0.93	0.9	Not_Removed	Not_Removed	Not_Removed	Not_Removed	B. longum subsp. longum
525	216816.171	Bifidobacterium	longum	NA	216816	DPC6316	32	NA	PRJNA394834	SAMN07958362	GCA_002833015.1	PJDR00000000	Feces	WGS	Illumina	2393969	60.4	2083	1992	100	0.952	Good	Human, Homo sapiens	2017-12-11	2018-01-01 04:35:41	2018-01-01 04:35:41	2045	1948	kingdom	1	0.95	0	0	0	0.92	0.88	Not_Removed	Not_Removed	Not_Removed	Not_Removed	B. longum subsp. longum
526	216816.172	Bifidobacterium	longum	NA	216816	APC1482	72	NA	PRJNA394834	SAMN07958359	GCA_002833035.1	PJDU00000000	Feces	WGS	Illumina	2337438	60.16	2032	1899	100	0.944	Good	Human, Homo sapiens	2017-12-11	2018-01-01 04:36:57	2018-01-01 04:36:57	1977	1905	kingdom	1	0.96	0	0	0	0.93	0.9	Not_Removed	Not_Removed	Not_Removed	Not_Removed	B. longum subsp. longum
527	216816.173	Bifidobacterium	longum	NA	216816	APC1478	21	NA	PRJNA394834	SAMN07958357	GCA_002833055.1	PJDW00000000	Feces	WGS	Illumina	2223352	59.82	1852	1766	100	0.944	Good	Human, Homo sapiens	2017-12-11	2018-01-01 04:37:00	2018-01-01 04:37:00	1799	1744	kingdom	1	0.97	0	0	0	0.94	0.91	Not_Removed	Not_Removed	Not_Removed	Not_Removed	B. longum subsp. longum
528	216816.174	Bifidobacterium	longum	NA	216816	APC1480	27	NA	PRJNA394834	SAMN07958358	GCA_002833065.1	PJDV00000000	Feces	WGS	Illumina	2477750	59.89	2200	2084	100	0.944	Good	Human, Homo sapiens	2017-12-11	2018-01-01 04:37:53	2018-01-01 04:37:53	2126	1964	kingdom	1	0.92	0	0	0	0.92	0.85	Not_Removed	Not_Removed	Not_Removed	Not_Removed	B. longum subsp. longum
529	216816.175	Bifidobacterium	longum	NA	216816	APC1477	24	NA	PRJNA394834	SAMN07958356	GCA_002833075.1	PJDX00000000	Feces	WGS	Illumina	2228807	59.81	1851	1761	100	0.944	Good	Human, Homo sapiens	2017-12-11	2018-01-01 04:36:32	2018-01-01 04:36:32	1806	1752	kingdom	1	0.97	0	0	0	0.94	0.91	Not_Removed	Not_Removed	Not_Removed	Not_Removed	B. longum subsp. longum
530	216816.176	Bifidobacterium	longum	NA	216816	APC1472	50	NA	PRJNA394834	SAMN07958353	GCA_002833115.1	PJEA00000000	Feces	WGS	Illumina	2364041	60.18	2057	1927	100	0.944	Good	Human, Homo sapiens	2017-12-11	2018-01-01 04:36:50	2018-01-01 04:36:50	1994	1910	kingdom	1	0.96	0	0	0	0.92	0.89	Not_Removed	Not_Removed	Not_Removed	Not_Removed	B. longum subsp. longum
531	216816.177	Bifidobacterium	longum	NA	216816	APC1473	39	NA	PRJNA394834	SAMN07958354	GCA_002833125.1	PJDZ00000000	Feces	WGS	Illumina	2317071	59.84	1971	1874	100	0.944	Good	Human, Homo sapiens	2017-12-11	2018-01-01 04:36:54	2018-01-01 04:36:54	1931	1865	kingdom	1	0.97	0	0	0	0.93	0.9	Not_Removed	Not_Removed	Not_Removed	Not_Removed	B. longum subsp. longum
532	216816.178	Bifidobacterium	longum	NA	216816	APC1468	45	NA	PRJNA394834	SAMN07958352	GCA_002833135.1	PJEB00000000	Feces	WGS	Illumina	2395158	60.17	2126	1994	100	0.944	Good	Human, Homo sapiens	2017-12-11	2018-01-01 04:37:47	2018-01-01 04:37:47	2062	1964	kingdom	1	0.95	0	0	0	0.92	0.88	Not_Removed	Not_Removed	Not_Removed	Not_Removed	B. longum subsp. longum
533	216816.179	Bifidobacterium	longum	NA	216816	APC1465	57	NA	PRJNA394834	SAMN07958350	GCA_002833175.1	PJED00000000	Feces	WGS	Illumina	2452211	59.67	2168	2032	100	0.935	Good	Human, Homo sapiens	2017-12-11	2018-01-01 04:38:07	2018-01-01 04:38:07	2097	1923	kingdom	1	0.92	0	0	0	0.92	0.84	Not_Removed	Not_Removed	Not_Removed	Not_Removed	B. longum subsp. longum
534	216816.180	Bifidobacterium	longum	NA	216816	APC1464	31	NA	PRJNA394834	SAMN07958349	GCA_002833185.1	PJEE00000000	Feces	WGS	Illumina	2346522	60.06	2008	1918	100	0.944	Good	Human, Homo sapiens	2017-12-11	2018-01-01 04:37:57	2018-01-01 04:37:57	1966	1898	kingdom	1	0.97	0	0	0	0.93	0.9	Not_Removed	Not_Removed	Not_Removed	Not_Removed	B. longum subsp. longum
535	216816.181	Bifidobacterium	longum	NA	216816	APC1462	27	NA	PRJNA394834	SAMN07958348	GCA_002833205.1	PJEF00000000	Feces	WGS	Illumina	2417784	60.26	2088	1992	100	0.944	Good	Human, Homo sapiens	2017-12-11	2018-01-01 04:37:41	2018-01-01 04:37:41	2029	1948	kingdom	1	0.96	0	0	0	0.92	0.89	Not_Removed	Not_Removed	Not_Removed	Not_Removed	B. longum subsp. longum
536	216816.182	Bifidobacterium	longum	NA	216816	DPC6323	52	NA	PRJNA394834	SAMN07958366	GCA_002833215.1	PJDN00000000	Feces	WGS	Illumina	2396960	60.23	2087	1970	100	0.944	Good	Human, Homo sapiens	2017-12-11	2018-01-01 04:37:50	2018-01-01 04:37:50	2026	1951	kingdom	1	0.96	0	0	0	0.93	0.89	Not_Removed	Not_Removed	Not_Removed	Not_Removed	B. longum subsp. longum
537	216816.183	Bifidobacterium	longum	NA	216816	DPC6320	25	NA	PRJNA394834	SAMN07958364	GCA_002833255.1	PJDP00000000	Feces	WGS	Illumina	2330371	59.9	1944	1852	100	0.944	Good	Human, Homo sapiens	2017-12-11	2018-01-01 04:37:44	2018-01-01 04:37:44	1889	1841	kingdom	1	0.97	0	0	0	0.93	0.91	Not_Removed	Not_Removed	Not_Removed	Not_Removed	B. longum subsp. longum
538	216816.184	Bifidobacterium	longum	NA	216816	APC1476	48	NA	PRJNA394834	SAMN07958355	GCA_002833265.1	PJDY00000000	Feces	WGS	Illumina	2532540	59.99	2266	2151	100	0.935	Good	Human, Homo sapiens	2017-12-11	2018-01-01 04:38:10	2018-01-01 04:38:10	2205	2018	kingdom	1	0.92	0	0	0	0.91	0.84	Not_Removed	Not_Removed	Not_Removed	Not_Removed	B. longum subsp. longum
539	216816.185	Bifidobacterium	longum	NA	216816	APC1466	51	NA	PRJNA394834	SAMN07958351	GCA_002833285.1	PJEC00000000	Feces	WGS	Illumina	2419982	59.83	2147	2026	100	0.927	Good	Human, Homo sapiens	2017-12-11	2018-01-01 04:38:00	2018-01-01 04:38:00	2079	1899	kingdom	1	0.91	0	0	0	0.92	0.84	Not_Removed	Not_Removed	Not_Removed	Not_Removed	B. longum subsp. longum
540	216816.186	Bifidobacterium	longum	NA	216816	APC1461	37	NA	PRJNA394834	SAMN07958347	GCA_002833315.1	PJEG00000000	Feces	WGS	Illumina	2418994	60.03	2112	1987	100	0.944	Good	Human, Homo sapiens	2017-12-11	2018-01-01 04:38:03	2018-01-01 04:38:03	2036	1969	kingdom	1	0.97	0	0	0	0.92	0.89	Not_Removed	Not_Removed	Not_Removed	Not_Removed	B. longum subsp. suis
541	216816.1972	Bifidobacterium	longum	NA	216816	BB-79	23	NA	PRJNA420803	SAMN08120363	GCA_004125375.1	PIYT00000000	Feces	WGS	Illumina	2206088	59.8665	1946	1886	NA	0.944	Good	Human, Homo sapiens	2019-01-31	2019-07-18 02:58:50	2019-07-18 02:58:50	1847	1797	kingdom	1	0.97	0	0	0	0.93	0.91	Not_Removed	Not_Removed	Not_Removed	Not_Removed	B. longum subsp. longum
542	216816.1973	Bifidobacterium	longum	NA	216816	bk_0021	45	30630933	PRJNA496358	SAMN10239587	GCA_004167725.1	RCXP00000000	Feces	WGS	Illumina	2320449	59.8849	2125	2042	NA	0.935	Good	Human, Homo sapiens	2019-02-11	2019-07-18 03:00:42	2019-07-18 03:00:42	1989	1918	kingdom	1	0.96	0	0	0	0.93	0.9	Not_Removed	Not_Removed	Not_Removed	Not_Removed	B. longum subsp. longum
543	216816.1974	Bifidobacterium	longum	NA	216816	51A	1	NA	PRJNA432691	SAMN08457432	GCA_004936435.1	CP026999	Feces	Complete	Illumina	2365873	60.1616	2020	1814	NA	0.944	Good	Human, Homo sapiens	2019-04-30	2019-07-18 03:32:37	2019-07-18 03:32:37	1949	1902	kingdom	1	0.98	0	0	0	0.94	0.92	Not_Removed	Not_Removed	Not_Removed	Not_Removed	B. longum subsp. longum
544	216816.1976	Bifidobacterium	longum	NA	216816	BSD2780061688st2_H1	43	NA	PRJNA518912	SAMN10863273	GCA_005844115.1	SPFS00000000	Feces	WGS	Illumina	2279897	59.9228	1963	NA	NA	0.944	Good	Human, Homo sapiens	2019-05-26	2019-07-18 03:35:04	2019-07-18 03:35:04	1913	1854	kingdom	1	0.97	0	0	0	0.94	0.91	Not_Removed	Not_Removed	Not_Removed	Not_Removed	B. longum subsp. longum
545	216816.1977	Bifidobacterium	longum	NA	216816	1001271st1_B4	25	NA	PRJNA518912	SAMN10863261	GCA_005844345.1	SPGA00000000	Feces	WGS	Illumina	2442309	60.2214	2079	NA	NA	0.944	Good	Human, Homo sapiens	2019-05-26	2019-07-18 03:33:00	2019-07-18 03:33:00	2035	1954	kingdom	1	0.96	0	0	0	0.93	0.89	Not_Removed	Not_Removed	Not_Removed	Not_Removed	B. longum subsp. longum
546	216816.1978	Bifidobacterium	longum	NA	216816	1001175st1_G10	48	NA	PRJNA518912	SAMN10863239	GCA_005844715.1	SPGO00000000	Feces	WGS	Illumina	2336076	59.8985	2064	NA	NA	0.944	Good	Human, Homo sapiens	2019-05-26	2019-07-18 03:36:24	2019-07-18 03:36:24	2001	1921	kingdom	1	0.96	0	0	0	0.93	0.89	Not_Removed	Not_Removed	Not_Removed	Not_Removed	B. longum subsp. longum
547	216816.2033	Bifidobacterium	longum	NA	216816	BAMA-B05	1	NA	PRJNA560141	SAMN12569298	GCA_008086305.1	CP043002	Elderly feces	Complete	Illumina	2268110	59.8832	1955	NA	NA	0.944	Good	Human, Homo sapiens	2019-08-26	2019-10-02 00:40:09	2019-10-02 00:40:09	1891	1838	kingdom	1	0.97	0	0	0	0.94	0.91	Not_Removed	Not_Removed	Not_Removed	Not_Removed	B. longum subsp. longum
548	216816.2037	Bifidobacterium	longum	NA	216816	S09C.meta.bin_6	143	31384000	PRJNA492716	SAMN10316695	GCA_008668555.1	RQBZ00000000	Feces	WGS	Illumina	2090931	60.2355	1862	NA	NA	0.815	Good	Human, Homo sapiens	2019-09-23	2019-10-02 14:06:15	2019-10-02 14:06:15	1822	1790	kingdom	1	0.98	0	0	0	0.95	0.93	Not_Removed	Not_Removed	Not_Removed	Not_Removed	B. longum subsp. longum
549	216816.2038	Bifidobacterium	longum	NA	216816	S09B.meta.bin_6	102	31384000	PRJNA492716	SAMN10316688	GCA_008668715.1	RQBS00000000	Feces	WGS	Illumina	2122755	60.1672	1885	NA	NA	0.831	Good	Human, Homo sapiens	2019-09-23	2019-10-02 14:07:33	2019-10-02 14:07:33	1827	1785	kingdom	1	0.98	0	0	0	0.94	0.92	Not_Removed	Not_Removed	Not_Removed	Not_Removed	B. longum subsp. longum
550	216816.2039	Bifidobacterium	longum	NA	216816	S09A.meta.bin_4	94	31384000	PRJNA492716	SAMN10316678	GCA_008668865.1	RQBI00000000	Feces	WGS	Illumina	2162272	60.204	1944	NA	NA	0.815	Good	Human, Homo sapiens	2019-09-23	2019-10-02 14:09:18	2019-10-02 14:09:18	1880	1828	kingdom	1	0.97	0	0	0	0.94	0.91	Not_Removed	Not_Removed	Not_Removed	Not_Removed	B. longum subsp. longum
551	216816.2040	Bifidobacterium	longum	NA	216816	S08A.meta.bin_6	66	31384000	PRJNA492716	SAMN10316649	GCA_008669195.1	RQAF00000000	Feces	WGS	Illumina	2179348	60.1785	1885	NA	NA	0.919	Good	Human, Homo sapiens	2019-09-23	2019-10-02 14:12:51	2019-10-02 14:12:51	1840	1792	kingdom	1	0.97	0	0	0	0.94	0.92	Not_Removed	Not_Removed	Not_Removed	Not_Removed	B. longum subsp. longum
552	216816.2041	Bifidobacterium	longum	NA	216816	S08C.meta.bin_5	68	31384000	PRJNA492716	SAMN10316668	GCA_008670925.1	RQAY00000000	Feces	WGS	Illumina	2143423	60.206	1841	NA	NA	0.927	Good	Human, Homo sapiens	2019-09-23	2019-10-02 14:15:01	2019-10-02 14:15:01	1799	1759	kingdom	1	0.98	0	0	0	0.94	0.92	Not_Removed	Not_Removed	Not_Removed	Not_Removed	B. longum subsp. longum
553	216816.2042	Bifidobacterium	longum	NA	216816	S08B.meta.bin_9	57	31384000	PRJNA492716	SAMN10316662	GCA_008671075.1	RQAS00000000	Feces	WGS	Illumina	1595597	60.4041	1431	NA	NA	0.565	Good	Human, Homo sapiens	2019-09-23	2019-10-02 14:15:53	2019-10-02 14:15:53	1396	1365	kingdom	1	0.98	0	0	0	0.94	0.92	Not_Removed	Not_Removed	Not_Removed	Not_Removed	B. longum subsp. longum
554	216816.2043	Bifidobacterium	longum	NA	216816	S05C.meta.bin_8	61	31384000	PRJNA492716	SAMN10316588	GCA_008671675.1	RPXW00000000	Feces	WGS	Illumina	2206047	60.2849	1940	NA	NA	0.919	Good	Human, Homo sapiens	2019-09-23	2019-10-02 14:23:52	2019-10-02 14:23:52	1890	1829	kingdom	1	0.97	0	0	0	0.93	0.9	Not_Removed	Not_Removed	Not_Removed	Not_Removed	B. longum subsp. longum
555	216816.2044	Bifidobacterium	longum	NA	216816	S05B.meta.bin_5	37	31384000	PRJNA492716	SAMN10316576	GCA_008671905.1	RPXK00000000	Feces	WGS	Illumina	2282085	60.1579	2020	NA	NA	0.935	Good	Human, Homo sapiens	2019-09-23	2019-10-02 14:27:27	2019-10-02 14:27:27	1956	1870	kingdom	1	0.96	0	0	0	0.93	0.89	Not_Removed	Not_Removed	Not_Removed	Not_Removed	B. longum subsp. longum
556	216816.2045	Bifidobacterium	longum	NA	216816	S05A.meta.bin_5	44	31384000	PRJNA492716	SAMN10316564	GCA_008672135.1	RPWY00000000	Feces	WGS	Illumina	2272930	60.1803	2017	NA	NA	0.927	Good	Human, Homo sapiens	2019-09-23	2019-10-02 14:30:23	2019-10-02 14:30:23	1962	1865	kingdom	1	0.95	0	0	0	0.93	0.88	Not_Removed	Not_Removed	Not_Removed	Not_Removed	B. longum subsp. longum
557	216816.2046	Bifidobacterium	longum	NA	216816	S04C.meta.bin_3	34	31384000	PRJNA492716	SAMN10316554	GCA_008672355.1	RPWO00000000	Feces	WGS	Illumina	2296029	60.2644	1973	NA	NA	0.935	Good	Human, Homo sapiens	2019-09-23	2019-10-02 14:33:47	2019-10-02 14:33:47	1918	1860	kingdom	1	0.97	0	0	0	0.93	0.91	Not_Removed	Not_Removed	Not_Removed	Not_Removed	B. longum subsp. longum
558	216816.2047	Bifidobacterium	longum	NA	216816	S04B.meta.bin_1	36	31384000	PRJNA492716	SAMN10316545	GCA_008672545.1	RPWF00000000	Feces	WGS	Illumina	2275415	60.2531	1969	NA	NA	0.927	Good	Human, Homo sapiens	2019-09-23	2019-10-02 14:36:10	2019-10-02 14:36:10	1902	1849	kingdom	1	0.97	0	0	0	0.94	0.91	Not_Removed	Not_Removed	Not_Removed	Not_Removed	B. longum subsp. longum
559	216816.2048	Bifidobacterium	longum	NA	216816	S04A.meta.bin_4	37	31384000	PRJNA492716	SAMN10316539	GCA_008672605.1	RPVZ00000000	Feces	WGS	Illumina	2298840	60.2619	1979	NA	NA	0.944	Good	Human, Homo sapiens	2019-09-23	2019-10-02 14:36:50	2019-10-02 14:36:50	1920	1861	kingdom	1	0.97	0	0	0	0.93	0.91	Not_Removed	Not_Removed	Not_Removed	Not_Removed	B. longum subsp. longum
560	216816.2049	Bifidobacterium	longum	NA	216816	S02C.meta.bin_11	60	31384000	PRJNA492716	SAMN10316497	GCA_008673465.1	RPUJ00000000	Feces	WGS	Illumina	2413184	60.1771	2116	NA	NA	0.943	Good	Human, Homo sapiens	2019-09-23	2019-10-02 14:47:18	2019-10-02 14:47:18	2048	1957	kingdom	1	0.96	0	0	0	0.93	0.88	Not_Removed	Not_Removed	Not_Removed	Not_Removed	B. longum subsp. longum
561	216816.2050	Bifidobacterium	longum	NA	216816	S02B.meta.bin_5	44	31384000	PRJNA492716	SAMN10316490	GCA_008673635.1	RPUC00000000	Feces	WGS	Illumina	2181458	60.1665	1861	NA	NA	0.919	Good	Human, Homo sapiens	2019-09-23	2019-10-02 14:49:10	2019-10-02 14:49:10	1804	1762	kingdom	1	0.98	0	0	0	0.95	0.92	Not_Removed	Not_Removed	Not_Removed	Not_Removed	B. longum subsp. longum
562	216816.2051	Bifidobacterium	longum	NA	216816	S01C.meta.bin_2	44	31384000	PRJNA492716	SAMN10316471	GCA_008673975.1	RPTJ00000000	Feces	WGS	Illumina	2375964	60.1564	2074	NA	NA	0.935	Good	Human, Homo sapiens	2019-09-23	2019-10-02 14:53:43	2019-10-02 14:53:43	2015	1953	kingdom	1	0.97	0	0	0	0.93	0.9	Not_Removed	Not_Removed	Not_Removed	Not_Removed	B. longum subsp. longum
563	216816.2052	Bifidobacterium	longum	NA	216816	S01B.meta.bin_8	24	31384000	PRJNA492716	SAMN10316466	GCA_008674095.1	RPTE00000000	Feces	WGS	Illumina	1650234	60.0172	1490	NA	NA	0.815	Good	Human, Homo sapiens	2019-09-23	2019-10-02 14:54:39	2019-10-02 14:54:39	1457	1414	kingdom	1	0.97	0	0	0	0.93	0.9	Not_Removed	Not_Removed	Not_Removed	Not_Removed	B. longum subsp. longum
564	216816.2053	Bifidobacterium	longum	NA	216816	S01A.meta.bin_3	51	31384000	PRJNA492716	SAMN10316452	GCA_008674375.1	RPSQ00000000	Feces	WGS	Illumina	2379428	60.1635	2081	NA	NA	0.936	Good	Human, Homo sapiens	2019-09-23	2019-10-02 14:58:29	2019-10-02 14:58:29	2036	1964	kingdom	1	0.96	0	0	0	0.93	0.9	Not_Removed	Not_Removed	Not_Removed	Not_Removed	B. longum subsp. longum
565	216816.2054	Bifidobacterium	longum	NA	216816	LMAG:92	9	31455406	PRJNA362284	SAMN06546896	GCA_008679415.1	NANF00000000	Feces	WGS	PacBio	2204996	59.9614	1957	NA	NA	0.911	Good	Human, Homo sapiens	2019-09-23	2019-10-02 15:01:48	2019-10-02 15:01:48	1887	1811	kingdom	1	0.96	0	0	0	0.92	0.88	Not_Removed	Not_Removed	Not_Removed	Not_Removed	B. longum subsp. longum
566	216816.2055	Bifidobacterium	longum	NA	216816	LMAG:34	4	31455406	PRJNA362284	SAMN06546838	GCA_008680575.1	NAKZ00000000	Feces	WGS	PacBio	2242241	60.2107	1923	NA	NA	0.887	Good	Human, Homo sapiens	2019-09-23	2019-10-02 15:18:30	2019-10-02 15:18:30	1853	1800	kingdom	1	0.97	0	0	0	0.94	0.91	Not_Removed	Not_Removed	Not_Removed	Not_Removed	B. longum subsp. longum
567	216816.2087	Bifidobacterium	longum	NA	216816	LTBL16	1	NA	PRJNA506747	SAMN10473362	GCA_009728915.1	CP034089	Feces	Complete	Illumina|Oxford Nanopore	2430682	60.2676	2091	NA	NA	0.944	Good	Human, Homo sapiens	2019-12-04	2019-12-31 16:27:55	2019-12-31 16:27:55	2023	1952	kingdom	1	0.96	0	0	0	0.92	0.89	Not_Removed	Not_Removed	Not_Removed	Not_Removed	B. longum subsp. longum
568	216816.2089	Bifidobacterium	longum	NA	216816	JSRL 03	3	NA	PRJNA592839	SAMN13440971		WOWU00000000	Infant feces	WGS	PacBio	2272987	60.2054	1955	1880	NA	0.943	Good	Human, Homo sapiens	2019-12-11	2019-12-31 21:03:51	2019-12-31 21:03:51	1873	1830	kingdom	1	0.98	0	0	0	0.95	0.93	Not_Removed	Not_Removed	Not_Removed	Not_Removed	B. longum subsp. longum
569	216816.2110	Bifidobacterium	longum	NA	216816	Jih1	1	NA	PRJNA613014	SAMN14390487	GCA_011764605.1	AP022868	Feces	Complete	Illumina|Oxford Nanopore	2371107	60.2919	2023	1941	NA	0.944	Good	Human, Homo sapiens	2020-03-24	2020-04-12 02:13:39	2020-04-12 02:13:39	1943	1883	kingdom	1	0.97	0	0	0	0.94	0.91	Not_Removed	Not_Removed	Not_Removed	Not_Removed	B. longum subsp. longum
570	216816.224	Bifidobacterium	longum	NA	216816	DS7_3	17	NA	PRJNA336518	SAMN06464099	GCA_003094975.1	QDIG00000000	Others	WGS	Illumina	2237293	59.9706	1934	1873	100	0.944	Good	Human, Homo sapiens	2018-05-06	2018-05-30 16:22:42	2018-05-30 16:22:42	1847	1807	kingdom	1	0.98	0	0	0	0.94	0.92	Not_Removed	Not_Removed	Not_Removed	Not_Removed	B. longum subsp. longum
571	216816.225	Bifidobacterium	longum	NA	216816	DS1_3	170	NA	PRJNA336518	SAMN06464096	GCA_003094955.1	QDIW00000000	Others	WGS	Illumina	2417279	60.0273	2320	2187	100	0.911	Good	Human, Homo sapiens	2018-05-06	2018-05-30 16:22:45	2018-05-30 16:22:45	2187	2016	kingdom	1	0.92	0	0	0	0.92	0.84	Not_Removed	Not_Removed	Not_Removed	Not_Removed	B. longum subsp. longum
572	216816.226	Bifidobacterium	longum	NA	216816	DS18_3	174	NA	PRJNA336518	SAMN06464098	GCA_003094935.1	QDJB00000000	Others	WGS	Illumina	2448259	59.6822	2325	2202	100	0.927	Good	Human, Homo sapiens	2018-05-06	2018-05-30 16:23:23	2018-05-30 16:23:23	2205	2052	genus	0.95	0.88	0.98	0.04	0.07	0.93	0.82	Removed	Not_Removed	Not_Removed	Removed	B. longum subsp. longum
573	216816.227	Bifidobacterium	longum	NA	216816	DS15_3	21	NA	PRJNA336518	SAMN06464097	GCA_003094855.1	QDIQ00000000	Others	WGS	Illumina	2398181	59.9351	2174	2075	100	0.935	Good	Human, Homo sapiens	2018-05-06	2018-05-30 16:23:35	2018-05-30 16:23:35	2054	1911	kingdom	1	0.93	0	0	0	0.92	0.85	Not_Removed	Not_Removed	Not_Removed	Not_Removed	B. longum subsp. longum
574	216816.228	Bifidobacterium	longum	NA	216816	DS9_3	13	NA	PRJNA336518	SAMN06464100	GCA_003094635.1	QDIF00000000	Others	WGS	Illumina	2397171	59.9356	2159	2067	100	0.944	Good	Human, Homo sapiens	2018-05-06	2018-05-30 16:24:40	2018-05-30 16:24:40	2047	1909	kingdom	1	0.93	0	0	0	0.92	0.85	Not_Removed	Not_Removed	Not_Removed	Not_Removed	B. longum subsp. longum
575	216816.2315	Bifidobacterium	longum	NA	216816	LC67	1	NA	PRJNA650278	SAMN15719936	GCA_014334375.1	CP060588	NA	Complete	PacBio	2360935	60.1355	1994	NA	NA	0.944	Good	Human, Homo sapiens	2020-08-31	2020-11-27 18:33:06	2020-11-27 18:33:06	1935	1888	kingdom	1	0.98	0	0	0	0.93	0.91	Not_Removed	Not_Removed	Not_Removed	Not_Removed	B. longum subsp. longum
576	216816.2316	Bifidobacterium	longum	NA	216816	COPD004	326	NA	PRJNA562766	SAMN12904951	GCA_014867405.1	WGSD00000000	Feces	WGS	Illumina	1875913	60.1022	1871	NA	NA	0.629	Good	Human, Homo sapiens	2020-10-08	2020-11-29 08:26:28	2020-11-29 08:26:28	1816	1774	kingdom	1	0.98	0	0	0	0.95	0.93	Not_Removed	Not_Removed	Not_Removed	Not_Removed	B. longum subsp. longum
577	216816.2317	Bifidobacterium	longum	NA	216816	COPD002	259	NA	PRJNA562766	SAMN12904949	GCA_014867415.1	WGSB00000000	Feces	WGS	Illumina	2004852	60.3453	1886	NA	NA	0.895	Good	Human, Homo sapiens	2020-10-08	2020-11-29 08:30:33	2020-11-29 08:30:33	1845	1788	kingdom	1	0.97	0	0	0	0.95	0.92	Not_Removed	Not_Removed	Not_Removed	Not_Removed	B. longum subsp. longum
578	216816.2318	Bifidobacterium	longum	NA	216816	COPD006	201	NA	PRJNA562766	SAMN12904953	GCA_014871795.1	WGSF00000000	Feces	WGS	Illumina	2217737	60.1183	2069	NA	NA	0.855	Good	Human, Homo sapiens	2020-10-08	2020-11-30 12:59:45	2020-11-30 12:59:45	2011	1933	kingdom	1	0.96	0	0	0	0.94	0.9	Not_Removed	Not_Removed	Not_Removed	Not_Removed	B. longum subsp. longum
579	216816.2319	Bifidobacterium	longum	NA	216816	COPD003	118	NA	PRJNA562766	SAMN12904950	GCA_014871865.1	WGSC00000000	Feces	WGS	Illumina	2168728	60.1044	1913	NA	NA	0.855	Good	Human, Homo sapiens	2020-10-08	2020-11-30 12:59:45	2020-11-30 12:59:45	1871	1829	kingdom	1	0.98	0	0	0	0.95	0.93	Not_Removed	Not_Removed	Not_Removed	Not_Removed	B. longum subsp. longum
580	216816.2320	Bifidobacterium	longum	NA	216816	COPD005	76	NA	PRJNA562766	SAMN12904952	GCA_014871875.1	WGSE00000000	Feces	WGS	Illumina	2272616	60.0503	2056	NA	NA	0.903	Good	Human, Homo sapiens	2020-10-08	2020-11-30 12:59:45	2020-11-30 12:59:45	2009	1909	kingdom	1	0.95	0	0	0	0.93	0.88	Not_Removed	Not_Removed	Not_Removed	Not_Removed	B. longum subsp. longum
581	216816.2321	Bifidobacterium	longum	NA	216816	D46t1_190503_C6	30	NA	PRJNA637878	SAMN15532852		JADMUN010000010,JADMUN010000011,JADMUN010000012,JADMUN010000013,JADMUN010000014,JADMUN010000015,JADMUN010000016	Feces	WGS	Illumina	2228907	59.7991	1883	NA	NA	0.944	Good	Human, Homo sapiens	2020-11-17	2020-11-30 15:02:37	2020-11-30 15:02:37	1836	1800	kingdom	1	0.98	0	0	0	0.94	0.92	Not_Removed	Not_Removed	Not_Removed	Not_Removed	B. longum subsp. longum
582	216816.2322	Bifidobacterium	longum	NA	216816	1001099B_141217_H2	98	NA	PRJNA637878	SAMN15533338		JADMTV010000043,JADMTV010000044,JADMTV010000045,JADMTV010000046,JADMTV010000047,JADMTV010000048,JADMTV010000049	Feces	WGS	Illumina	2305529	59.8778	2014	NA	NA	0.935	Good	Human, Homo sapiens	2020-11-17	2020-11-30 15:08:03	2020-11-30 15:08:03	1961	1894	kingdom	1	0.97	0	0	0	0.94	0.9	Not_Removed	Not_Removed	Not_Removed	Not_Removed	B. longum subsp. longum
583	216816.2323	Bifidobacterium	longum	NA	216816	J1101004_170508_D4	45	NA	PRJNA637878	SAMN15532921		JADMVV010000010,JADMVV010000011,JADMVV010000012,JADMVV010000013,JADMVV010000014,JADMVV010000015,JADMVV010000016	Feces	WGS	Illumina	2432888	60.1495	2107	NA	NA	0.944	Good	Human, Homo sapiens	2020-11-17	2020-11-30 15:10:21	2020-11-30 15:10:21	2043	1964	kingdom	1	0.96	0	0	0	0.92	0.88	Not_Removed	Not_Removed	Not_Removed	Not_Removed	B. longum subsp. longum
584	216816.2324	Bifidobacterium	longum	NA	216816	BSD2780061689_150309_E10	27	NA	PRJNA637878	SAMN15532580		JADNAG010000010,JADNAG010000011,JADNAG010000012,JADNAG010000013,JADNAG010000014,JADNAG010000015,JADNAG010000016	Feces	WGS	Illumina	2312812	60.0441	2006	NA	NA	0.944	Good	Human, Homo sapiens	2020-11-17	2020-11-30 15:28:33	2020-11-30 15:28:33	1954	1899	kingdom	1	0.97	0	0	0	0.93	0.91	Not_Removed	Not_Removed	Not_Removed	Not_Removed	B. longum subsp. longum
585	216816.2325	Bifidobacterium	longum	NA	216816	D59t2_181005_F6	38	NA	PRJNA637878	SAMN15532904		JADNBL010000010,JADNBL010000011,JADNBL010000012,JADNBL010000013,JADNBL010000014,JADNBL010000015,JADNBL010000016	Feces	WGS	Illumina	2313943	60.0449	1974	NA	NA	0.944	Good	Human, Homo sapiens	2020-11-17	2020-11-30 15:32:48	2020-11-30 15:32:48	1931	1882	kingdom	1	0.97	0	0	0	0.94	0.92	Not_Removed	Not_Removed	Not_Removed	Not_Removed	B. longum subsp. longum
586	216816.2326	Bifidobacterium	longum	NA	216816	BSD2780120874_150323_E3	49	NA	PRJNA637878	SAMN15532997		JADNCJ010000010,JADNCJ010000011,JADNCJ010000012,JADNCJ010000013,JADNCJ010000014,JADNCJ010000015,JADNCJ010000016	Feces	WGS	Illumina	2336967	60.0851	2048	NA	NA	0.944	Good	Human, Homo sapiens	2020-11-17	2020-11-30 15:37:13	2020-11-30 15:37:13	1971	1907	kingdom	1	0.97	0	0	0	0.93	0.9	Not_Removed	Not_Removed	Not_Removed	Not_Removed	B. longum subsp. longum
587	216816.2327	Bifidobacterium	longum	NA	216816	BSD2780061688_150302_C8	20	NA	PRJNA637878	SAMN15532993		JADNCO010000010,JADNCO010000011,JADNCO010000012,JADNCO010000013,JADNCO010000014,JADNCO010000015,JADNCO010000016	Feces	WGS	Illumina	2323266	59.9699	1971	NA	NA	0.944	Good	Human, Homo sapiens	2020-11-17	2020-11-30 15:38:29	2020-11-30 15:38:29	1924	1867	kingdom	1	0.97	0	0	0	0.93	0.9	Not_Removed	Not_Removed	Not_Removed	Not_Removed	B. longum subsp. longum
588	216816.2328	Bifidobacterium	longum	NA	216816	D6t1_180914_F8	57	NA	PRJNA637878	SAMN15532428		JADNCU010000010,JADNCU010000011,JADNCU010000012,JADNCU010000013,JADNCU010000014,JADNCU010000015,JADNCU010000016	Feces	WGS	Illumina	2458871	59.7737	2208	NA	NA	0.944	Good	Human, Homo sapiens	2020-11-17	2020-11-30 15:37:45	2020-11-30 15:37:45	2177	1995	kingdom	1	0.92	0	0	0	0.91	0.83	Not_Removed	Not_Removed	Not_Removed	Not_Removed	B. longum subsp. longum
589	216816.2329	Bifidobacterium	longum	NA	216816	D6t1_180914_B2	58	NA	PRJNA637878	SAMN15533139		JADNGT010000010,JADNGT010000011,JADNGT010000012,JADNGT010000013,JADNGT010000014,JADNGT010000015,JADNGT010000016	Feces	WGS	Illumina	2487666	59.7894	2228	NA	NA	0.944	Good	Human, Homo sapiens	2020-11-17	2020-11-30 15:55:24	2020-11-30 15:55:24	2185	2006	kingdom	1	0.92	0	0	0	0.91	0.83	Not_Removed	Not_Removed	Not_Removed	Not_Removed	B. longum subsp. longum
590	216816.2330	Bifidobacterium	longum	NA	216816	D52t1_170925_H5	63	NA	PRJNA637878	SAMN15532928		JADNHG010000010,JADNHG010000011,JADNHG010000012,JADNHG010000013,JADNHG010000014,JADNHG010000015,JADNHG010000016	Feces	WGS	Illumina	2400751	60.12	2124	NA	NA	0.944	Good	Human, Homo sapiens	2020-11-17	2020-11-30 15:53:35	2020-11-30 15:53:35	2063	1964	kingdom	1	0.95	0	0	0	0.93	0.88	Not_Removed	Not_Removed	Not_Removed	Not_Removed	B. longum subsp. longum
591	216816.2331	Bifidobacterium	longum	NA	216816	1001275B_160808_B3	38	NA	PRJNA637878	SAMN15532617		JADNHR010000010,JADNHR010000011,JADNHR010000012,JADNHR010000013,JADNHR010000014,JADNHR010000015,JADNHR010000016	Feces	WGS	Illumina	2547268	59.5518	2305	NA	NA	0.944	Good	Human, Homo sapiens	2020-11-17	2020-11-30 15:55:48	2020-11-30 15:55:48	2244	2001	kingdom	1	0.89	0	0	0	0.9	0.8	Not_Removed	Not_Removed	Not_Removed	Not_Removed	B. longum subsp. longum
592	216816.2332	Bifidobacterium	longum	NA	216816	D31t1_170403_F11	36	NA	PRJNA637878	SAMN15533213		JADNIF010000010,JADNIF010000011,JADNIF010000012,JADNIF010000013,JADNIF010000014,JADNIF010000015,JADNIF010000016	Feces	WGS	Illumina	2375229	59.9621	2038	NA	NA	0.944	Good	Human, Homo sapiens	2020-11-17	2020-11-30 16:01:16	2020-11-30 16:01:16	1999	1949	kingdom	1	0.97	0	0	0	0.93	0.91	Not_Removed	Not_Removed	Not_Removed	Not_Removed	B. longum subsp. longum
593	216816.2333	Bifidobacterium	longum	NA	216816	1001136B_160425_B5	23	NA	PRJNA637878	SAMN15532765		JADNJT010000010,JADNJT010000011,JADNJT010000012,JADNJT010000013,JADNJT010000014,JADNJT010000015,JADNJT010000016	Feces	WGS	Illumina	2382926	59.9432	2077	NA	NA	0.944	Good	Human, Homo sapiens	2020-11-17	2020-11-30 16:06:57	2020-11-30 16:06:57	2020	1886	kingdom	1	0.93	0	0	0	0.92	0.86	Not_Removed	Not_Removed	Not_Removed	Not_Removed	B. longum subsp. longum
594	216816.2334	Bifidobacterium	longum	NA	216816	BSD2780120874_150323_H5	60	NA	PRJNA637878	SAMN15533149		JADNLW010000010,JADNLW010000011,JADNLW010000012,JADNLW010000013,JADNLW010000014,JADNLW010000015,JADNLW010000016	Feces	WGS	Illumina	2491615	60.0777	2232	NA	NA	0.944	Good	Human, Homo sapiens	2020-11-17	2020-11-30 16:15:17	2020-11-30 16:15:17	2161	2020	kingdom	1	0.93	0	0	0	0.91	0.85	Not_Removed	Not_Removed	Not_Removed	Not_Removed	B. longum subsp. longum
595	216816.2335	Bifidobacterium	longum	NA	216816	1001175B_160314_B2	49	NA	PRJNA637878	SAMN15532691		JADNOO010000010,JADNOO010000011,JADNOO010000012,JADNOO010000013,JADNOO010000014,JADNOO010000015,JADNOO010000016	Feces	WGS	Illumina	2387577	59.9929	2107	NA	NA	0.944	Good	Human, Homo sapiens	2020-11-17	2020-11-30 16:31:18	2020-11-30 16:31:18	2057	1976	kingdom	1	0.96	0	0	0	0.93	0.89	Not_Removed	Not_Removed	Not_Removed	Not_Removed	B. longum subsp. longum
596	216816.2336	Bifidobacterium	longum	NA	216816	BSD2780120875_150330_F5	27	NA	PRJNA637878	SAMN15532947		JADMOK010000010,JADMOK010000011,JADMOK010000012,JADMOK010000013,JADMOK010000014,JADMOK010000015,JADMOK010000016	Feces	WGS	Illumina	2379697	60.2528	2096	NA	NA	0.944	Good	Human, Homo sapiens	2020-11-17	2020-11-30 16:38:44	2020-11-30 16:38:44	2057	1928	kingdom	1	0.94	0	0	0	0.92	0.86	Not_Removed	Not_Removed	Not_Removed	Not_Removed	B. longum subsp. longum
597	216816.2337	Bifidobacterium	longum	NA	216816	BSD2780061688b_171218_H1	43	NA	PRJNA637878	SAMN15532945		JADMOM010000010,JADMOM010000011,JADMOM010000012,JADMOM010000013,JADMOM010000014,JADMOM010000015,JADMOM010000016	Feces	WGS	Illumina	2279897	59.9228	1954	NA	NA	0.944	Good	Human, Homo sapiens	2020-11-17	2020-11-30 16:40:51	2020-11-30 16:40:51	1913	1854	kingdom	1	0.97	0	0	0	0.94	0.91	Not_Removed	Not_Removed	Not_Removed	Not_Removed	B. longum subsp. longum
598	216816.2338	Bifidobacterium	longum	NA	216816	1001713B170214_170313_H7	54	NA	PRJNA637878	SAMN15533225		JADMOR010000010,JADMOR010000011,JADMOR010000012,JADMOR010000013,JADMOR010000014,JADMOR010000015,JADMOR010000016	Feces	WGS	Illumina	2367958	59.7208	2088	NA	NA	0.944	Good	Human, Homo sapiens	2020-11-17	2020-11-30 16:40:50	2020-11-30 16:40:50	2041	1927	kingdom	1	0.94	0	0	0	0.92	0.87	Not_Removed	Not_Removed	Not_Removed	Not_Removed	B. longum subsp. longum
599	216816.2339	Bifidobacterium	longum	NA	216816	1001095H_141210_B2	119	NA	PRJNA637878	SAMN15533229		JADMOZ010000030,JADMOZ010000031,JADMOZ010000032,JADMOZ010000033,JADMOZ010000002,JADMOZ010000034,JADMOZ010000035	Feces	WGS	Illumina	2538011	60.1417	2264	NA	NA	0.944	Good	Human, Homo sapiens	2020-11-17	2020-11-30 16:42:52	2020-11-30 16:42:52	2227	2123	kingdom	1	0.95	0	0	0	0.91	0.87	Not_Removed	Not_Removed	Not_Removed	Not_Removed	B. longum subsp. longum
600	216816.2340	Bifidobacterium	longum	NA	216816	1001302B_160321_G1	37	NA	PRJNA637878	SAMN15533049		JADMSA010000010,JADMSA010000011,JADMSA010000012,JADMSA010000013,JADMSA010000014,JADMSA010000015,JADMSA010000016	Feces	WGS	Illumina	2387299	60.1424	2062	NA	NA	0.944	Good	Human, Homo sapiens	2020-11-17	2020-11-30 16:58:20	2020-11-30 16:58:20	1989	1918	kingdom	1	0.96	0	0	0	0.93	0.9	Not_Removed	Not_Removed	Not_Removed	Not_Removed	B. longum subsp. longum
601	216816.2341	Bifidobacterium	longum	NA	216816	D41t1_190614_F6	26	NA	PRJNA637878	SAMN15533048		JADMSF010000010,JADMSF010000011,JADMSF010000012,JADMSF010000013,JADMSF010000014,JADMSF010000015,JADMSF010000016	Feces	WGS	Illumina	2305178	59.9277	1967	NA	NA	0.944	Good	Human, Homo sapiens	2020-11-17	2020-11-30 17:00:25	2020-11-30 17:00:25	1922	1871	kingdom	1	0.97	0	0	0	0.93	0.91	Not_Removed	Not_Removed	Not_Removed	Not_Removed	B. longum subsp. longum
602	216816.2345	Bifidobacterium	longum	NA	216816	D31t1_170403_B2	39	NA	PRJNA637878	SAMN15532477		JADPDI010000010,JADPDI010000011,JADPDI010000012,JADPDI010000013,JADPDI010000014,JADPDI010000015,JADPDI010000016	Feces	WGS	Illumina	2318606	59.9256	1957	NA	NA	0.944	Good	Human, Homo sapiens	2020-11-23	2021-01-02 05:43:50	2021-01-02 05:43:50	1917	1874	kingdom	1	0.98	0	0	0	0.94	0.92	Not_Removed	Not_Removed	Not_Removed	Not_Removed	B. longum subsp. longum
603	216816.2346	Bifidobacterium	longum	NA	216816	BSD2780061687b_171204_C6	97	NA	PRJNA637878	SAMN15532912		JADPDM010000067,JADPDM010000068,JADPDM010000010,JADPDM010000069,JADPDM010000070,JADPDM010000071,JADPDM010000072	Feces	WGS	Illumina	2470184	59.905	2164	NA	NA	0.944	Good	Human, Homo sapiens	2020-11-23	2021-01-02 05:43:50	2021-01-02 05:43:50	2130	2054	class	0.98	0.94	0.96	0.02	0.04	0.93	0.88	Removed	Not_Removed	Not_Removed	Removed	B. longum subsp. longum
604	216816.2347	Bifidobacterium	longum	NA	216816	1001270J_160509_E11	86	NA	PRJNA637878	SAMN15533239		JADPES010000010,JADPES010000011,JADPES010000012,JADPES010000013,JADPES010000014,JADPES010000015,JADPES010000016	Feces	WGS	Illumina	2438970	60.3341	2143	NA	NA	0.952	Good	Human, Homo sapiens	2020-11-23	2021-01-01 16:33:06	2021-01-01 16:33:06	2082	1997	kingdom	1	0.96	0	0	0	0.93	0.89	Not_Removed	Not_Removed	Not_Removed	Not_Removed	B. longum subsp. longum
605	216816.2348	Bifidobacterium	longum	NA	216816	BSD2780061687b_171204_F1	64	NA	PRJNA637878	SAMN15532730		JADPFY010000010,JADPFY010000011,JADPFY010000012,JADPFY010000013,JADPFY010000014,JADPFY010000015,JADPFY010000016	Feces	WGS	Illumina	2498026	60.1426	2191	NA	NA	0.944	Good	Human, Homo sapiens	2020-11-23	2021-01-01 16:36:35	2021-01-01 16:36:35	2137	2044	kingdom	1	0.96	0	0	0	0.92	0.88	Not_Removed	Not_Removed	Not_Removed	Not_Removed	B. longum subsp. longum
606	216816.2349	Bifidobacterium	longum	NA	216816	1001262B_160229_E5	50	NA	PRJNA637878	SAMN15532998		JADPAC010000010,JADPAC010000011,JADPAC010000012,JADPAC010000013,JADPAC010000014,JADPAC010000015,JADPAC010000016	Feces	WGS	Illumina	2350163	59.8907	2030	NA	NA	0.944	Good	Human, Homo sapiens	2020-11-23	2021-01-02 05:43:50	2021-01-02 05:43:50	1982	1912	kingdom	1	0.96	0	0	0	0.93	0.9	Not_Removed	Not_Removed	Not_Removed	Not_Removed	B. longum subsp. longum
607	216816.2350	Bifidobacterium	longum	NA	216816	1001283B150225_161107_F12	57	NA	PRJNA637878	SAMN15532405		JADPAR010000010,JADPAR010000011,JADPAR010000012,JADPAR010000013,JADPAR010000014,JADPAR010000015,JADPAR010000016	Feces	WGS	Illumina	2573865	59.996	2300	NA	NA	0.944	Good	Human, Homo sapiens	2020-11-23	2021-01-01 16:41:16	2021-01-01 16:41:16	2230	2050	kingdom	1	0.92	0	0	0	0.9	0.83	Not_Removed	Not_Removed	Not_Removed	Not_Removed	B. longum subsp. longum
608	216816.2351	Bifidobacterium	longum	NA	216816	D33t1_170424_E8	43	NA	PRJNA637878	SAMN15532819		JADPBA010000010,JADPBA010000011,JADPBA010000012,JADPBA010000013,JADPBA010000014,JADPBA010000015,JADPBA010000016	Feces	WGS	Illumina	2382321	60.1599	2072	NA	NA	0.944	Good	Human, Homo sapiens	2020-11-23	2021-01-01 16:42:06	2021-01-01 16:42:06	2007	1926	kingdom	1	0.96	0	0	0	0.93	0.89	Not_Removed	Not_Removed	Not_Removed	Not_Removed	B. longum subsp. longum
609	216816.2352	Bifidobacterium	longum	NA	216816	1001270J_160509_F3	83	NA	PRJNA637878	SAMN15532499		JADPBO010000010,JADPBO010000011,JADPBO010000012,JADPBO010000013,JADPBO010000014,JADPBO010000015,JADPBO010000016	Feces	WGS	Illumina	2280791	60.0524	1952	NA	NA	0.952	Good	Human, Homo sapiens	2020-11-23	2021-01-01 16:42:25	2021-01-01 16:42:25	1904	1848	kingdom	1	0.97	0	0	0	0.94	0.91	Not_Removed	Not_Removed	Not_Removed	Not_Removed	B. longum subsp. longum
610	216816.2353	Bifidobacterium	longum	NA	216816	1001283B150225_161107_D10	29	NA	PRJNA637878	SAMN15532493		JADPBV010000010,JADPBV010000011,JADPBV010000012,JADPBV010000013,JADPBV010000014,JADPBV010000015,JADPBV010000016	Feces	WGS	Illumina	2329133	59.962	1970	NA	NA	0.944	Good	Human, Homo sapiens	2020-11-23	2021-01-01 16:42:38	2021-01-01 16:42:38	1914	1861	kingdom	1	0.97	0	0	0	0.94	0.91	Not_Removed	Not_Removed	Not_Removed	Not_Removed	B. longum subsp. longum
611	216816.2354	Bifidobacterium	longum	NA	216816	1001275B_160808_A8	55	NA	PRJNA637878	SAMN15533110		JADPBZ010000010,JADPBZ010000011,JADPBZ010000012,JADPBZ010000013,JADPBZ010000014,JADPBZ010000015,JADPBZ010000016	Feces	WGS	Illumina	2387487	60.0699	2080	NA	NA	0.944	Good	Human, Homo sapiens	2020-11-23	2021-01-01 16:42:43	2021-01-01 16:42:43	1996	1924	kingdom	1	0.96	0	0	0	0.93	0.9	Not_Removed	Not_Removed	Not_Removed	Not_Removed	B. longum subsp. longum
612	216816.2355	Bifidobacterium	longum	NA	216816	D53t1_180928_E2	36	NA	PRJNA637878	SAMN15533352		JADPCM010000010,JADPCM010000011,JADPCM010000012,JADPCM010000013,JADPCM010000014,JADPCM010000015,JADPCM010000016	Feces	WGS	Illumina	2275027	59.915	1938	NA	NA	0.944	Good	Human, Homo sapiens	2020-11-23	2021-01-01 16:42:09	2021-01-01 16:42:09	1892	1839	kingdom	1	0.97	0	0	0	0.94	0.91	Not_Removed	Not_Removed	Not_Removed	Not_Removed	B. longum subsp. longum
613	216816.2356	Bifidobacterium	longum	NA	216816	1001271B_150615_B4	25	NA	PRJNA637878	SAMN15532877	GCA_015670955.1	JADPCO010000010,JADPCO010000011,JADPCO010000012,JADPCO010000013,JADPCO010000014,JADPCO010000015,JADPCO010000016	Feces	WGS	Illumina	2441055	60.2304	2072	NA	NA	0.944	Good	Human, Homo sapiens	2020-11-23	2021-01-01 16:46:58	2021-01-01 16:46:58	2035	1954	kingdom	1	0.96	0	0	0	0.93	0.89	Not_Removed	Not_Removed	Not_Removed	Not_Removed	B. longum subsp. longum
614	216816.2357	Bifidobacterium	longum	NA	216816	BSD2780120875b_170604_H11	29	NA	PRJNA637878	SAMN15532650		JADPCP010000010,JADPCP010000011,JADPCP010000012,JADPCP010000013,JADPCP010000014,JADPCP010000015,JADPCP010000016	Feces	WGS	Illumina	2410765	60.295	2110	NA	NA	0.944	Good	Human, Homo sapiens	2020-11-23	2021-01-02 05:43:50	2021-01-02 05:43:50	2031	1954	kingdom	1	0.96	0	0	0	0.93	0.9	Not_Removed	Not_Removed	Not_Removed	Not_Removed	B. longum subsp. longum
615	216816.2358	Bifidobacterium	longum	NA	216816	J1101437_171009_B2	40	NA	PRJNA637878	SAMN15532480		JADPCU010000010,JADPCU010000011,JADPCU010000012,JADPCU010000013,JADPCU010000014,JADPCU010000015,JADPCU010000016	Feces	WGS	Illumina	2403549	60.1237	2077	NA	NA	0.944	Good	Human, Homo sapiens	2020-11-23	2021-01-01 16:47:10	2021-01-01 16:47:10	2024	1940	kingdom	1	0.96	0	0	0	0.93	0.89	Not_Removed	Not_Removed	Not_Removed	Not_Removed	B. longum subsp. longum
616	216816.2359	Bifidobacterium	longum	NA	216816	1001254J_160919_E2	61	NA	PRJNA637878	SAMN15532973		JADPDA010000010,JADPDA010000011,JADPDA010000012,JADPDA010000013,JADPDA010000014,JADPDA010000015,JADPDA010000016	Feces	WGS	Illumina	2438082	60.0365	2159	NA	NA	0.944	Good	Human, Homo sapiens	2020-11-23	2021-01-01 16:46:53	2021-01-01 16:46:53	2101	1991	kingdom	1	0.95	0	0	0	0.92	0.87	Not_Removed	Not_Removed	Not_Removed	Not_Removed	B. longum subsp. longum
617	216816.2363	Bifidobacterium	longum	NA	216816	Bifidobacterium_longum_BgEED06	27	NA	PRJEB32184	SAMEA5664351	GCA_901873505.1	CABFLL000000000	Intestine	WGS	Unknown	2426212	59.8996	2164	2076	NA	0.952	Good	Human, Homo sapiens	2021-02-13	2021-02-27 21:56:59	2021-02-27 21:56:59	2065	1992	kingdom	1	0.96	0	0	0	0.92	0.88	Not_Removed	Not_Removed	Not_Removed	Not_Removed	B. longum subsp. suis
618	216816.254	Bifidobacterium	longum	NA	216816	N3A01	46	28552417	PRJNA387952	SAMN07189849	GCA_003369995.1	NJNU00000000	Vagina	WGS	Illumina	2305221	60.0045	2156	2000	98.6	0.871	Good	Human, Homo sapiens	2018-08-10	2018-09-30 13:57:22	2018-09-30 13:57:22	1961	1913	kingdom	1	0.98	0	0	0	0.93	0.91	Not_Removed	Not_Removed	Not_Removed	Not_Removed	B. longum subsp. longum
619	216816.256	Bifidobacterium	longum	NA	216816	N2G10	351	28552417	PRJNA387952	SAMN07189848	GCA_003370025.1	NJNV00000000	Vagina	WGS	Illumina	2278383	60.1564	2346	2155	100	0.823	Good	Human, Homo sapiens	2018-08-10	2018-09-30 13:58:00	2018-09-30 13:58:00	2206	2101	kingdom	1	0.95	0	0	0	0.92	0.88	Not_Removed	Not_Removed	Not_Removed	Not_Removed	B. longum subsp. longum
620	216816.257	Bifidobacterium	longum	NA	216816	N2F05	43	28552417	PRJNA387952	SAMN07189847	GCA_003370035.1	NJNW00000000	Vagina	WGS	Illumina	2333415	60.0465	2154	2016	100	0.919	Good	Human, Homo sapiens	2018-08-10	2018-09-30 13:58:39	2018-09-30 13:58:39	1971	1891	kingdom	1	0.96	0	0	0	0.93	0.89	Not_Removed	Not_Removed	Not_Removed	Not_Removed	B. longum subsp. longum
621	216816.258	Bifidobacterium	longum	NA	216816	N2E12	55	28552417	PRJNA387952	SAMN07189846	GCA_003370065.1	NJNX00000000	Vagina	WGS	Illumina	2344663	60.1147	2213	2058	98.6	0.895	Good	Human, Homo sapiens	2018-08-10	2018-09-30 13:59:05	2018-09-30 13:59:05	2019	1957	kingdom	1	0.97	0	0	0	0.93	0.9	Not_Removed	Not_Removed	Not_Removed	Not_Removed	B. longum subsp. longum
622	216816.262	Bifidobacterium	longum	NA	216816	239-2	116	28552417	PRJNA387952	SAMN07189844	GCA_003370255.1	NJNZ00000000	Vagina	WGS	Illumina	2275165	59.7315	2121	1969	100	0.911	Good	Human, Homo sapiens	2018-08-10	2018-09-30 13:58:32	2018-09-30 13:58:32	1996	1911	kingdom	1	0.96	0	0	0	0.91	0.87	Not_Removed	Not_Removed	Not_Removed	Not_Removed	B. longum subsp. longum
623	216816.263	Bifidobacterium	longum	NA	216816	TM04-17	51	NA	PRJNA482748	SAMN09736971	GCA_003436505.1	QSPY00000000	Feces	WGS	Illumina	2414802	59.9881	2205	2117	100	0.944	Good	Human, Homo sapiens	2018-08-31	2018-10-02 04:11:37	2018-10-02 04:11:37	2081	1956	kingdom	1	0.94	0	0	0	0.92	0.86	Not_Removed	Not_Removed	Not_Removed	Not_Removed	B. longum subsp. longum
624	216816.264	Bifidobacterium	longum	NA	216816	TM02-7	31	NA	PRJNA482748	SAMN09736966	GCA_003436595.1	QSQD00000000	Feces	WGS	Illumina	2393254	60.2577	2109	2036	100	0.944	Good	Human, Homo sapiens	2018-08-31	2018-10-02 04:12:29	2018-10-02 04:12:29	1995	1925	kingdom	1	0.96	0	0	0	0.93	0.9	Not_Removed	Not_Removed	Not_Removed	Not_Removed	B. longum subsp. longum
625	216816.265	Bifidobacterium	longum	NA	216816	TF07-39	16	NA	PRJNA482748	SAMN09736908	GCA_003437095.1	QSRO00000000	Feces	WGS	Illumina	2451819	60.0661	2209	2121	100	0.944	Good	Human, Homo sapiens	2018-08-31	2018-10-02 04:21:42	2018-10-02 04:21:42	2081	1955	kingdom	1	0.94	0	0	0	0.91	0.85	Not_Removed	Not_Removed	Not_Removed	Not_Removed	B. longum subsp. longum
626	216816.266	Bifidobacterium	longum	NA	216816	TF07-31	22	NA	PRJNA482748	SAMN09736906	GCA_003437135.1	QSRQ00000000	Feces	WGS	Illumina	2443319	60.0265	2192	2098	100	0.944	Good	Human, Homo sapiens	2018-08-31	2018-10-02 04:22:20	2018-10-02 04:22:20	2059	1939	kingdom	1	0.94	0	0	0	0.91	0.86	Not_Removed	Not_Removed	Not_Removed	Not_Removed	B. longum subsp. longum
627	216816.267	Bifidobacterium	longum	NA	216816	TF07-34	26	NA	PRJNA482748	SAMN09736907	GCA_003437105.1	QSRP00000000	Feces	WGS	Illumina	2373802	60.0944	2086	2004	100	0.944	Good	Human, Homo sapiens	2018-08-31	2018-10-02 04:41:18	2018-10-02 04:41:18	1965	1892	kingdom	1	0.96	0	0	0	0.92	0.89	Not_Removed	Not_Removed	Not_Removed	Not_Removed	B. longum subsp. longum
628	216816.268	Bifidobacterium	longum	NA	216816	TM01-1	19	NA	PRJNA482748	SAMN09736962	GCA_003437455.1	QSQH00000000	Feces	WGS	Illumina	2350747	60.342	2087	2017	100	0.944	Good	Human, Homo sapiens	2018-08-31	2018-10-02 04:30:05	2018-10-02 04:30:05	1974	1904	kingdom	1	0.96	0	0	0	0.93	0.89	Not_Removed	Not_Removed	Not_Removed	Not_Removed	B. longum subsp. longum
629	216816.269	Bifidobacterium	longum	NA	216816	TF08-4AC	22	NA	PRJNA482748	SAMN09736919	GCA_003437695.1	QSRH00000000	Feces	WGS	Illumina	2429596	60.122	2145	2064	100	0.944	Good	Human, Homo sapiens	2018-08-31	2018-10-02 04:36:53	2018-10-02 04:36:53	2026	1946	kingdom	1	0.96	0	0	0	0.93	0.89	Not_Removed	Not_Removed	Not_Removed	Not_Removed	B. longum subsp. infantis
630	216816.270	Bifidobacterium	longum	NA	216816	TF06-45A	21	NA	PRJNA482748	SAMN09736897	GCA_003437715.1	QSRZ00000000	Feces	WGS	Illumina	2525616	59.6063	2372	2274	100	0.944	Good	Human, Homo sapiens	2018-08-31	2018-10-02 04:37:03	2018-10-02 04:37:03	2224	2000	kingdom	1	0.9	0	0	0	0.9	0.81	Not_Removed	Not_Removed	Not_Removed	Not_Removed	B. longum subsp. infantis
631	216816.271	Bifidobacterium	longum	NA	216816	TF01-22	14	NA	PRJNA482748	SAMN09736866	GCA_003437995.1	QSSW00000000	Feces	WGS	Illumina	2384490	60.2314	2101	2028	100	0.944	Good	Human, Homo sapiens	2018-08-31	2018-10-02 04:42:29	2018-10-02 04:42:29	1989	1917	kingdom	1	0.96	0	0	0	0.92	0.89	Not_Removed	Not_Removed	Not_Removed	Not_Removed	B. longum subsp. longum
632	216816.272	Bifidobacterium	longum	NA	216816	OM05-2BH	46	NA	PRJNA482748	SAMN09736802	GCA_003438385.1	QSUI00000000	Feces	WGS	Illumina	2436854	60.1064	2260	2159	100	0.935	Good	Human, Homo sapiens	2018-08-31	2018-10-02 04:49:11	2018-10-02 04:49:11	2120	1989	kingdom	1	0.94	0	0	0	0.91	0.85	Not_Removed	Not_Removed	Not_Removed	Not_Removed	B. longum subsp. longum
633	216816.273	Bifidobacterium	longum	NA	216816	TF06-12AC	21	NA	PRJNA482748	SAMN09736888	GCA_003438485.1	QSSF00000000	Feces	WGS	Illumina	2527625	59.6051	2362	2278	100	0.935	Good	Human, Homo sapiens	2018-08-31	2018-10-02 05:07:30	2018-10-02 05:07:30	2230	2007	kingdom	1	0.9	0	0	0	0.9	0.81	Not_Removed	Not_Removed	Not_Removed	Not_Removed	B. longum subsp. infantis
634	216816.274	Bifidobacterium	longum	NA	216816	AF27-1BH	18	NA	PRJNA482748	SAMN09734529	GCA_003457975.1	QRTM00000000	Feces	WGS	Illumina	2337082	60.059	2064	1976	100	0.944	Good	Human, Homo sapiens	2018-09-05	2018-10-02 09:14:19	2018-10-02 09:14:19	1934	1861	kingdom	1	0.96	0	0	0	0.92	0.89	Not_Removed	Not_Removed	Not_Removed	Not_Removed	B. longum subsp. longum
635	216816.275	Bifidobacterium	longum	NA	216816	AF26-10	18	NA	PRJNA482748	SAMN09734508	GCA_003458335.1	QRTY00000000	Feces	WGS	Illumina	2347460	60.1898	2093	2014	100	0.944	Good	Human, Homo sapiens	2018-09-05	2018-10-02 09:20:10	2018-10-02 09:20:10	1968	1898	kingdom	1	0.96	0	0	0	0.92	0.89	Not_Removed	Not_Removed	Not_Removed	Not_Removed	B. longum subsp. longum
636	216816.276	Bifidobacterium	longum	NA	216816	OF01-16	48	NA	PRJNA482748	SAMN09736665	GCA_003463285.1	QSDD00000000	Feces	WGS	Illumina	2248299	59.9613	1998	1924	100	0.944	Good	Human, Homo sapiens	2018-09-06	2018-10-02 10:34:41	2018-10-02 10:34:41	1871	1839	kingdom	1	0.98	0	0	0	0.94	0.92	Not_Removed	Not_Removed	Not_Removed	Not_Removed	B. longum subsp. longum
637	216816.277	Bifidobacterium	longum	NA	216816	AF14-34	30	NA	PRJNA482748	SAMN09734258	GCA_003464575.1	QRZE00000000	Feces	WGS	Illumina	2409077	60.1182	2140	2069	100	0.944	Good	Human, Homo sapiens	2018-09-06	2018-10-02 10:57:43	2018-10-02 10:57:43	2019	1945	kingdom	1	0.96	0	0	0	0.93	0.9	Not_Removed	Not_Removed	Not_Removed	Not_Removed	B. longum subsp. longum
638	216816.278	Bifidobacterium	longum	NA	216816	AF14-22	26	NA	PRJNA482748	SAMN09734253	GCA_003464685.1	QRZJ00000000	Feces	WGS	Illumina	2407211	60.1318	2145	2069	100	0.944	Good	Human, Homo sapiens	2018-09-06	2018-10-02 11:06:32	2018-10-02 11:06:32	2009	1937	kingdom	1	0.96	0	0	0	0.93	0.9	Not_Removed	Not_Removed	Not_Removed	Not_Removed	B. longum subsp. longum
639	216816.279	Bifidobacterium	longum	NA	216816	AF13-41	22	NA	PRJNA482748	SAMN09734240	GCA_003464805.1	QRZU00000000	Feces	WGS	Illumina	2320313	60.39	2044	1968	100	0.944	Good	Human, Homo sapiens	2018-09-06	2018-10-02 11:00:47	2018-10-02 11:00:47	1923	1785	kingdom	1	0.93	0	0	0	0.92	0.86	Not_Removed	Not_Removed	Not_Removed	Not_Removed	B. longum subsp. longum
640	216816.280	Bifidobacterium	longum	NA	216816	AF11-41	30	NA	PRJNA482748	SAMN09734211	GCA_003465095.1	QSAM00000000	Feces	WGS	Illumina	2383621	60.2803	2143	2074	100	0.944	Good	Human, Homo sapiens	2018-09-06	2018-10-02 11:09:58	2018-10-02 11:09:58	1999	1858	kingdom	1	0.93	0	0	0	0.92	0.86	Not_Removed	Not_Removed	Not_Removed	Not_Removed	B. longum subsp. longum
641	216816.281	Bifidobacterium	longum	NA	216816	AF13-34	24	NA	PRJNA482748	SAMN09734235	GCA_003465365.1	QRZY00000000	Feces	WGS	Illumina	2319487	60.3871	2036	1969	100	0.944	Good	Human, Homo sapiens	2018-09-06	2018-10-02 11:11:52	2018-10-02 11:11:52	1925	1786	kingdom	1	0.93	0	0	0	0.92	0.86	Not_Removed	Not_Removed	Not_Removed	Not_Removed	B. longum subsp. longum
642	216816.282	Bifidobacterium	longum	NA	216816	AF11-12	58	NA	PRJNA482748	SAMN09734206	GCA_003465455.1	QSAR00000000	Feces	WGS	Illumina	2685340	60.3148	2525	2431	100	0.943	Good	Human, Homo sapiens	2018-09-06	2018-10-02 11:16:42	2018-10-02 11:16:42	2369	2090	phylum	0.99	0.88	0.22	0.02	0.04	0.89	0.78	Not_Removed	Not_Removed	Not_Removed	Not_Removed	B. longum subsp. longum
643	216816.283	Bifidobacterium	longum	NA	216816	AF08-2	23	NA	PRJNA482748	SAMN09734194	GCA_003465545.1	QSAY00000000	Feces	WGS	Illumina	2540121	60.2043	2330	2237	100	0.944	Good	Human, Homo sapiens	2018-09-06	2018-10-02 11:14:32	2018-10-02 11:14:32	2204	2066	kingdom	1	0.94	0	0	0	0.9	0.85	Not_Removed	Not_Removed	Not_Removed	Not_Removed	B. longum subsp. longum
644	216816.284	Bifidobacterium	longum	NA	216816	AF05-2	21	NA	PRJNA482748	SAMN09734186	GCA_003465635.1	QSBF00000000	Feces	WGS	Illumina	2426911	60.3634	2201	2137	100	0.944	Good	Human, Homo sapiens	2018-09-06	2018-10-02 11:15:40	2018-10-02 11:15:40	2080	1937	kingdom	1	0.93	0	0	0	0.92	0.86	Not_Removed	Not_Removed	Not_Removed	Not_Removed	B. longum subsp. longum
645	216816.285	Bifidobacterium	longum	NA	216816	AF05-16	23	NA	PRJNA482748	SAMN09734185	GCA_003465665.1	QSBG00000000	Feces	WGS	Illumina	2425745	60.3573	2204	2139	100	0.944	Good	Human, Homo sapiens	2018-09-06	2018-10-02 11:17:02	2018-10-02 11:17:02	2082	1937	kingdom	1	0.93	0	0	0	0.92	0.86	Not_Removed	Not_Removed	Not_Removed	Not_Removed	B. longum subsp. longum
646	216816.286	Bifidobacterium	longum	NA	216816	AF04-13	16	NA	PRJNA482748	SAMN09734175	GCA_003465745.1	QSBN00000000	Feces	WGS	Illumina	2376016	60.1411	2113	2030	100	0.944	Good	Human, Homo sapiens	2018-09-06	2018-10-02 11:20:02	2018-10-02 11:20:02	1999	1912	kingdom	1	0.96	0	0	0	0.92	0.88	Not_Removed	Not_Removed	Not_Removed	Not_Removed	B. longum subsp. longum
647	216816.287	Bifidobacterium	longum	NA	216816	AF03-27	20	NA	PRJNA482748	SAMN09734172	GCA_003465785.1	QSBQ00000000	Feces	WGS	Illumina	2446110	60.2114	2145	2051	100	0.944	Good	Human, Homo sapiens	2018-09-06	2018-10-02 11:18:37	2018-10-02 11:18:37	2019	1958	kingdom	1	0.97	0	0	0	0.92	0.89	Not_Removed	Not_Removed	Not_Removed	Not_Removed	B. longum subsp. longum
648	216816.288	Bifidobacterium	longum	NA	216816	AF03-20	17	NA	PRJNA482748	SAMN09734170	GCA_003466045.1	QSBS00000000	Feces	WGS	Illumina	2445778	60.2127	2144	2053	100	0.944	Good	Human, Homo sapiens	2018-09-06	2018-10-02 11:22:16	2018-10-02 11:22:16	2014	1954	kingdom	1	0.97	0	0	0	0.92	0.89	Not_Removed	Not_Removed	Not_Removed	Not_Removed	B. longum subsp. longum
649	216816.289	Bifidobacterium	longum	NA	216816	AF03-10	19	NA	PRJNA482748	SAMN09734168	GCA_003466075.1	QSBU00000000	Feces	WGS	Illumina	2444083	60.2105	2128	2050	100	0.944	Good	Human, Homo sapiens	2018-09-06	2018-10-02 11:22:16	2018-10-02 11:22:16	2015	1953	kingdom	1	0.97	0	0	0	0.92	0.89	Not_Removed	Not_Removed	Not_Removed	Not_Removed	B. longum subsp. longum
650	216816.290	Bifidobacterium	longum	NA	216816	TM06-1	14	NA	PRJNA482748	SAMN09736986	GCA_003466425.1	QSPJ00000000	Feces	WGS	Illumina	2404043	60.2041	2111	2036	100	0.944	Good	Human, Homo sapiens	2018-08-31	2018-10-02 11:29:35	2018-10-02 11:29:35	1999	1924	kingdom	1	0.96	0	0	0	0.93	0.89	Not_Removed	Not_Removed	Not_Removed	Not_Removed	B. longum subsp. longum
651	216816.291	Bifidobacterium	longum	NA	216816	TM05-14	19	NA	PRJNA482748	SAMN09736978	GCA_003466505.1	QSPR00000000	Feces	WGS	Illumina	2506808	59.9426	2299	2215	100	0.944	Good	Human, Homo sapiens	2018-08-31	2018-10-02 11:27:58	2018-10-02 11:27:58	2174	2000	kingdom	1	0.92	0	0	0	0.91	0.84	Not_Removed	Not_Removed	Not_Removed	Not_Removed	B. longum subsp. longum
652	216816.292	Bifidobacterium	longum	NA	216816	TM04-48B	25	NA	PRJNA482748	SAMN09736975	GCA_003466545.1	QSPU00000000	Feces	WGS	Illumina	2373237	59.964	2139	2058	100	0.944	Good	Human, Homo sapiens	2018-08-31	2018-10-02 11:28:02	2018-10-02 11:28:02	2021	1915	kingdom	1	0.95	0	0	0	0.92	0.87	Not_Removed	Not_Removed	Not_Removed	Not_Removed	B. longum subsp. longum
653	216816.293	Bifidobacterium	longum	NA	216816	AM39-8AC	14	NA	PRJNA482748	SAMN09736517	GCA_003467395.1	QSGR00000000	Feces	WGS	Illumina	2345691	60.1201	2075	2006	100	0.944	Good	Human, Homo sapiens	2018-09-06	2018-10-02 11:44:28	2018-10-02 11:44:28	1956	1873	kingdom	1	0.96	0	0	0	0.92	0.88	Not_Removed	Not_Removed	Not_Removed	Not_Removed	B. longum subsp. longum
654	216816.294	Bifidobacterium	longum	NA	216816	AM34-3	24	NA	PRJNA482748	SAMN09736466	GCA_003467905.1	QSIE00000000	Feces	WGS	Illumina	2377486	60.1304	2105	2008	100	0.944	Good	Human, Homo sapiens	2018-09-06	2018-10-02 11:51:22	2018-10-02 11:51:22	1981	1898	kingdom	1	0.96	0	0	0	0.92	0.88	Not_Removed	Not_Removed	Not_Removed	Not_Removed	B. longum subsp. longum
655	216816.295	Bifidobacterium	longum	NA	216816	AM42-13AT	16	NA	PRJNA482748	SAMN09736542	GCA_003468005.1	QSGC00000000	Feces	WGS	Illumina	2226368	60.0866	1916	1865	100	0.944	Good	Human, Homo sapiens	2018-09-06	2018-10-02 11:56:06	2018-10-02 11:56:06	1829	1775	kingdom	1	0.97	0	0	0	0.94	0.91	Not_Removed	Not_Removed	Not_Removed	Not_Removed	B. longum subsp. longum
656	216816.296	Bifidobacterium	longum	NA	216816	AM39-10AC	14	NA	PRJNA482748	SAMN09736509	GCA_003468265.1	QSGY00000000	Feces	WGS	Illumina	2233711	60.0329	1925	1861	100	0.944	Good	Human, Homo sapiens	2018-09-06	2018-10-02 11:55:58	2018-10-02 11:55:58	1820	1776	kingdom	1	0.98	0	0	0	0.94	0.92	Not_Removed	Not_Removed	Not_Removed	Not_Removed	B. longum subsp. longum
657	216816.297	Bifidobacterium	longum	NA	216816	AM31-13LB	14	NA	PRJNA482748	SAMN09736426	GCA_003468805.1	QSJE00000000	Feces	WGS	Illumina	2434520	60.181	2174	2105	100	0.944	Good	Human, Homo sapiens	2018-09-06	2018-10-02 12:03:38	2018-10-02 12:03:38	2044	1926	kingdom	1	0.94	0	0	0	0.92	0.87	Not_Removed	Not_Removed	Not_Removed	Not_Removed	B. longum subsp. infantis
658	216816.298	Bifidobacterium	longum	NA	216816	AM30-9LB	28	NA	PRJNA482748	SAMN09736422	GCA_003468825.1	QSJH00000000	Feces	WGS	Illumina	2297471	60.1251	2072	2001	100	0.944	Good	Human, Homo sapiens	2018-09-06	2018-10-02 12:03:59	2018-10-02 12:03:59	1958	1885	kingdom	1	0.96	0	0	0	0.93	0.89	Not_Removed	Not_Removed	Not_Removed	Not_Removed	B. longum subsp. longum
659	216816.299	Bifidobacterium	longum	NA	216816	AM21-20	25	NA	PRJNA482748	SAMN09734892	GCA_003471245.1	QRIR00000000	Feces	WGS	Illumina	2332494	60.0029	2018	1964	100	0.944	Good	Human, Homo sapiens	2018-09-06	2018-10-02 12:43:26	2018-10-02 12:43:26	1910	1871	kingdom	1	0.98	0	0	0	0.94	0.92	Not_Removed	Not_Removed	Not_Removed	Not_Removed	B. longum subsp. longum
660	216816.300	Bifidobacterium	longum	NA	216816	AM20-3	38	NA	PRJNA482748	SAMN09734882	GCA_003471345.1	QRIY00000000	Feces	WGS	Illumina	2298098	60.0086	1990	1929	100	0.952	Good	Human, Homo sapiens	2018-09-06	2018-10-02 14:51:09	2018-10-02 14:51:09	1893	1848	kingdom	1	0.98	0	0	0	0.94	0.92	Not_Removed	Not_Removed	Not_Removed	Not_Removed	B. longum subsp. longum
661	216816.301	Bifidobacterium	longum	NA	216816	AM20-39	22	NA	PRJNA482748	SAMN09734884	GCA_003471355.1	QRIW00000000	Feces	WGS	Illumina	2296533	60.0091	1979	1917	100	0.952	Good	Human, Homo sapiens	2018-09-06	2018-10-02 14:51:22	2018-10-02 14:51:22	1883	1840	kingdom	1	0.98	0	0	0	0.94	0.92	Not_Removed	Not_Removed	Not_Removed	Not_Removed	B. longum subsp. longum
662	216816.302	Bifidobacterium	longum	NA	216816	AM20-19AC	43	NA	PRJNA482748	SAMN09734881	GCA_003471385.1	QRIZ00000000	Feces	WGS	Illumina	2294887	60.0139	1999	1931	100	0.952	Good	Human, Homo sapiens	2018-09-06	2018-10-02 14:51:13	2018-10-02 14:51:13	1900	1858	kingdom	1	0.98	0	0	0	0.94	0.92	Not_Removed	Not_Removed	Not_Removed	Not_Removed	B. longum subsp. longum
663	216816.303	Bifidobacterium	longum	NA	216816	AM16-2	17	NA	PRJNA482748	SAMN09734826	GCA_003471915.1	QRKK00000000	Feces	WGS	Illumina	2288380	60.0404	2015	1947	100	0.944	Good	Human, Homo sapiens	2018-09-06	2018-10-02 15:11:36	2018-10-02 15:11:36	1909	1853	kingdom	1	0.97	0	0	0	0.94	0.91	Not_Removed	Not_Removed	Not_Removed	Not_Removed	B. longum subsp. longum
664	216816.304	Bifidobacterium	longum	NA	216816	AM12-16	23	NA	PRJNA482748	SAMN09734785	GCA_003472305.1	QRLQ00000000	Feces	WGS	Illumina	2307971	59.9977	1994	1934	100	0.944	Good	Human, Homo sapiens	2018-09-06	2018-10-02 15:04:41	2018-10-02 15:04:41	1882	1838	kingdom	1	0.98	0	0	0	0.94	0.92	Not_Removed	Not_Removed	Not_Removed	Not_Removed	B. longum subsp. longum
665	216816.305	Bifidobacterium	longum	NA	216816	AM11-2	25	NA	PRJNA482748	SAMN09734779	GCA_003472405.1	QRLW00000000	Feces	WGS	Illumina	2323343	60.1525	2055	1973	100	0.944	Good	Human, Homo sapiens	2018-09-06	2018-10-02 15:09:08	2018-10-02 15:09:08	1938	1867	kingdom	1	0.96	0	0	0	0.93	0.89	Not_Removed	Not_Removed	Not_Removed	Not_Removed	B. longum subsp. longum
666	216816.306	Bifidobacterium	longum	NA	216816	AM10-15B	44	NA	PRJNA482748	SAMN09734765	GCA_003472605.1	QRMG00000000	Feces	WGS	Illumina	2414114	60.1993	2148	2079	100	0.944	Good	Human, Homo sapiens	2018-09-06	2018-10-02 15:39:55	2018-10-02 15:39:55	2025	1958	phylum	1	0.97	0.7	0.03	0.05	0.93	0.9	Removed	Not_Removed	Not_Removed	Removed	B. longum subsp. longum
667	216816.307	Bifidobacterium	longum	NA	216816	AM11-5	32	NA	PRJNA482748	SAMN09734782	GCA_003473205.1	QRLT00000000	Feces	WGS	Illumina	2357113	60.122	2104	2014	100	0.944	Good	Human, Homo sapiens	2018-09-06	2018-10-02 15:25:20	2018-10-02 15:25:20	1973	1894	kingdom	1	0.96	0	0	0	0.92	0.89	Not_Removed	Not_Removed	Not_Removed	Not_Removed	B. longum subsp. longum
668	216816.308	Bifidobacterium	longum	NA	216816	AF36-1	19	NA	PRJNA482748	SAMN09734632	GCA_003474905.1	QRPJ00000000	Feces	WGS	Illumina	2378857	60.087	2145	2057	100	0.944	Good	Human, Homo sapiens	2018-09-06	2018-10-02 16:10:03	2018-10-02 16:10:03	2017	1932	kingdom	1	0.96	0	0	0	0.92	0.88	Not_Removed	Not_Removed	Not_Removed	Not_Removed	B. longum subsp. longum
669	216816.309	Bifidobacterium	longum	NA	216816	AF35-13AC	21	NA	PRJNA482748	SAMN09734620	GCA_003475025.1	QRPR00000000	Feces	WGS	Illumina	2394501	60.0508	2120	2040	100	0.944	Good	Human, Homo sapiens	2018-09-06	2018-10-02 16:11:50	2018-10-02 16:11:50	2003	1937	kingdom	1	0.97	0	0	0	0.93	0.9	Not_Removed	Not_Removed	Not_Removed	Not_Removed	B. longum subsp. longum
670	216816.310	Bifidobacterium	longum	NA	216816	AF34-9AC	36	NA	PRJNA482748	SAMN09734618	GCA_003475055.1	QRPT00000000	Feces	WGS	Illumina	2402802	59.9504	2150	2068	100	0.944	Good	Human, Homo sapiens	2018-09-06	2018-10-02 16:11:40	2018-10-02 16:11:40	2033	1970	kingdom	1	0.97	0	0	0	0.92	0.89	Not_Removed	Not_Removed	Not_Removed	Not_Removed	B. longum subsp. longum
671	216816.311	Bifidobacterium	longum	NA	216816	AF30-12	16	NA	PRJNA482748	SAMN09734565	GCA_003475835.1	QRQV00000000	Feces	WGS	Illumina	2265641	59.9073	1967	1906	100	0.944	Good	Human, Homo sapiens	2018-09-06	2018-10-02 16:25:45	2018-10-02 16:25:45	1837	1793	kingdom	1	0.98	0	0	0	0.94	0.92	Not_Removed	Not_Removed	Not_Removed	Not_Removed	B. longum subsp. longum
672	216816.312	Bifidobacterium	longum	NA	216816	AF30-11	18	NA	PRJNA482748	SAMN09734564	GCA_003475865.1	QRQW00000000	Feces	WGS	Illumina	2265900	59.9055	1966	1907	100	0.944	Good	Human, Homo sapiens	2018-09-06	2018-10-02 16:26:39	2018-10-02 16:26:39	1838	1795	kingdom	1	0.98	0	0	0	0.94	0.92	Not_Removed	Not_Removed	Not_Removed	Not_Removed	B. longum subsp. longum
673	216816.324	Bifidobacterium	longum	NA	216816	ICIS-505	60	NA	PRJNA379379	SAMN06606733	GCA_003790375.1	RJZF00000000	Feces	WGS	Illumina	2448844	59.8353	2211	2154	NA	0.935	Good	Human, Homo sapiens	2018-11-27	2019-01-30 01:30:52	2019-01-30 01:30:52	2102	1931	kingdom	1	0.92	0	0	0	0.91	0.84	Not_Removed	Not_Removed	Not_Removed	Not_Removed	B. longum subsp. longum
674	28025.1	Bifidobacterium	animalis	NA	28025	A6	1	NA	PRJNA271239	SAMN03273367	GCF_000817045.1	CP010433	Feces	Complete	PacBio	1958651	60.49	1653	1622	100	0.96	Good	Human, Homo sapiens	2015-01-09	2016-01-17 15:42:01	2016-01-17 15:42:01	1591	1554	kingdom	1	0.98	0	0	0	0.98	0.96	Not_Removed	Not_Removed	Not_Removed	Not_Removed
675	28025.12	Bifidobacterium	animalis	NA	28025	Bifido_08	75	NA	PRJEB18553	SAMEA51820918	GCF_900157045.1	FTRP00000000	Infants	WGS	Unknown	1954362	60.36	1703	NA	100	0.96	Good	Human, Homo sapiens	2017-02-08	2017-03-20 09:20:40	2017-03-20 09:20:40	1654	1599	order	0.99	0.95	1	0.02	0.05	0.98	0.94	Removed	Not_Removed	Not_Removed	Removed
676	28025.127	Bifidobacterium	animalis	NA	28025	01	1	NA	PRJNA516982	SAMN10817706	GCA_004135895.1	CP035497	Feces	Complete	Illumina	1931632	60.493	1651	1583	NA	0.96	Good	Human, Homo sapiens	2019-02-04	2019-07-17 01:40:37	2019-07-17 01:40:37	1569	1533	kingdom	1	0.98	0	0	0	0.98	0.96	Not_Removed	Not_Removed	Not_Removed	Not_Removed
677	28025.128	Bifidobacterium	animalis	NA	28025	co_0103	14	30630933	PRJNA496358	SAMN10239584	GCA_004167905.1	RCXF00000000	Feces	WGS	Illumina	1920186	60.4362	1668	1595	NA	0.96	Good	Human, Homo sapiens	2019-02-11	2019-07-17 01:49:00	2019-07-17 01:49:00	1577	1541	kingdom	1	0.98	0	0	0	0.98	0.96	Not_Removed	Not_Removed	Not_Removed	Not_Removed
678	28025.129	Bifidobacterium	animalis	NA	28025	BSD2780061688st1_E5	15	NA	PRJNA518912	SAMN10863267	GCA_005844245.1	SPFV00000000	Feces	WGS	Illumina	1919199	60.4616	1638	NA	NA	0.96	Good	Human, Homo sapiens	2019-05-26	2019-07-17 01:48:55	2019-07-17 01:48:55	1575	1538	kingdom	1	0.98	0	0	0	0.98	0.96	Not_Removed	Not_Removed	Not_Removed	Not_Removed
679	28025.13	Bifidobacterium	animalis	NA	28025	Bifido_11	46	NA	PRJEB18553	SAMEA51823168	GCF_900157135.1	FTRE00000000	Infants	WGS	Unknown	1938432	60.39	1674	NA	100	0.96	Good	Human, Homo sapiens	2017-02-08	2017-03-20 09:21:15	2017-03-20 09:21:15	1621	1572	kingdom	1	0.97	0	0	0	0.98	0.95	Not_Removed	Not_Removed	Not_Removed	Not_Removed
680	28025.13	Bifidobacterium	animalis	NA	28025	J063	15	NA	PRJDB8215	SAMD00168440	GCA_006538245.1	BJKG00000000	NA	WGS	Illumina	1917421	60.457	1648	1571	NA	0.96	Good	Human, Homo sapiens	2019-05-23	2019-09-30 12:42:15	2019-09-30 12:42:15	1581	1542	kingdom	1	0.98	0	0	0	0.98	0.95	Not_Removed	Not_Removed	Not_Removed	Not_Removed
681	28025.131	Bifidobacterium	animalis	NA	28025	J218	15	NA	PRJDB8215	SAMD00168441	GCA_006538265.1	BJKH00000000	NA	WGS	Illumina	1918142	60.4586	1645	1561	NA	0.96	Good	Human, Homo sapiens	2019-05-23	2019-09-30 12:42:13	2019-09-30 12:42:13	1580	1541	kingdom	1	0.98	0	0	0	0.98	0.95	Not_Removed	Not_Removed	Not_Removed	Not_Removed
682	28025.132	Bifidobacterium	animalis	NA	28025	J231	15	NA	PRJDB8215	SAMD00168442	GCA_006538285.1	BJKI00000000	NA	WGS	Illumina	1910072	60.4987	1638	1561	NA	0.96	Good	Human, Homo sapiens	2019-05-23	2019-09-30 12:42:11	2019-09-30 12:42:11	1574	1534	kingdom	1	0.97	0	0	0	0.98	0.95	Not_Removed	Not_Removed	Not_Removed	Not_Removed
683	28025.133	Bifidobacterium	animalis	NA	28025	B06	1	NA	PRJNA560132	SAMN12569105	GCA_008041995.1	CP042940	Elderly feces	Complete	Illumina	1944145	60.4892	1662	1593	NA	0.96	Good	Human, Homo sapiens	2019-08-21	2019-10-01 21:41:09	2019-10-01 21:41:09	1580	1545	kingdom	1	0.98	0	0	0	0.98	0.96	Not_Removed	Not_Removed	Not_Removed	Not_Removed
684	28025.137	Bifidobacterium	animalis	NA	28025	BIOML-A3	14	31477907	PRJNA544527	SAMN11944590	GCA_009075825.1	WDOC00000000	Feces	WGS	Illumina	1921742	60.4354	1666	1592	NA	0.96	Good	Human, Homo sapiens	2019-10-15	2019-10-28 01:08:36	2019-10-28 01:08:36	1578	1542	kingdom	1	0.98	0	0	0	0.98	0.96	Not_Removed	Not_Removed	Not_Removed	Not_Removed
685	28025.138	Bifidobacterium	animalis	NA	28025	BIOML-A1	13	31477907	PRJNA544527	SAMN11944588	GCA_009077835.1	WDOA00000000	Feces	WGS	Illumina	1919128	60.4631	1665	1586	NA	0.96	Good	Human, Homo sapiens	2019-10-15	2019-10-28 01:08:44	2019-10-28 01:08:44	1575	1538	kingdom	1	0.98	0	0	0	0.98	0.96	Not_Removed	Not_Removed	Not_Removed	Not_Removed
686	28025.139	Bifidobacterium	animalis	NA	28025	BIOML-A2	13	31477907	PRJNA544527	SAMN11944589	GCA_009075805.1	WDOB00000000	Feces	WGS	Illumina	1919252	60.4623	1661	1587	NA	0.96	Good	Human, Homo sapiens	2019-10-15	2019-11-25 04:49:53	2019-11-25 04:49:53	1573	1537	kingdom	1	0.98	0	0	0	0.98	0.96	Not_Removed	Not_Removed	Not_Removed	Not_Removed
687	28025.165	Bifidobacterium	animalis	NA	28025	1001713B170131_170501_H10	18	NA	PRJNA637878	SAMN15533300		JADNFD010000010,JADNFD010000011,JADNFD010000012,JADNFD010000013,JADNFD010000014,JADNFD010000015,JADNFD010000016	Feces	WGS	Illumina	1917715	60.4615	1631	NA	NA	0.96	Good	Human, Homo sapiens	2020-11-17	2020-11-30 15:45:43	2020-11-30 15:45:43	1572	1535	kingdom	1	0.98	0	0	0	0.98	0.96	Not_Removed	Not_Removed	Not_Removed	Not_Removed
688	28025.19	Bifidobacterium	animalis	NA	28025	BL3	1	28702200	PRJNA340074	SAMN05631165	GCA_002220485.1	CP017098	Others	Complete	PacBio	1944323	60.48	1651	1546	100	0.96	Good	Human, Homo sapiens	2017-07-18	2017-09-29 15:33:20	2017-09-29 15:33:20	1583	1547	kingdom	1	0.98	0	0	0	0.98	0.96	Not_Removed	Not_Removed	Not_Removed	Not_Removed
689	28025.23	Bifidobacterium	animalis	NA	28025	DS1_2	15	NA	PRJNA336518	SAMN06464091	GCA_003095115.1	QDIU00000000	Others	WGS	Illumina	1920582	60.4627	1670	1591	100	0.96	Good	Human, Homo sapiens	2018-05-06	2018-05-30 16:20:50	2018-05-30 16:20:50	1580	1543	kingdom	1	0.98	0	0	0	0.98	0.96	Not_Removed	Not_Removed	Not_Removed	Not_Removed
690	28025.24	Bifidobacterium	animalis	NA	28025	DS2_2	16	NA	PRJNA336518	SAMN06464094	GCA_003095075.1	QDIP00000000	Others	WGS	Illumina	1916859	60.4639	1666	1583	100	0.96	Good	Human, Homo sapiens	2018-05-06	2018-05-30 16:21:39	2018-05-30 16:21:39	1575	1536	kingdom	1	0.98	0	0	0	0.98	0.96	Not_Removed	Not_Removed	Not_Removed	Not_Removed
691	28025.25	Bifidobacterium	animalis	NA	28025	DS20_2	61	NA	PRJNA336518	SAMN06464095	GCA_003095055.1	QDIZ00000000	Others	WGS	Illumina	1928900	60.4096	1687	1610	100	0.96	Good	Human, Homo sapiens	2018-05-06	2018-05-30 16:22:09	2018-05-30 16:22:09	1613	1563	kingdom	1	0.97	0	0	0	0.98	0.95	Not_Removed	Not_Removed	Not_Removed	Not_Removed
692	28025.26	Bifidobacterium	animalis	NA	28025	DS11_2	15	NA	PRJNA336518	SAMN06464092	GCA_003094895.1	QDIT00000000	Others	WGS	Illumina	1920501	60.4631	1672	1592	100	0.96	Good	Human, Homo sapiens	2018-05-06	2018-05-30 16:23:27	2018-05-30 16:23:27	1581	1544	kingdom	1	0.98	0	0	0	0.98	0.96	Not_Removed	Not_Removed	Not_Removed	Not_Removed
693	28025.27	Bifidobacterium	animalis	NA	28025	DS15_2	17	NA	PRJNA336518	SAMN06464093	GCA_003094875.1	QDIR00000000	Others	WGS	Illumina	1919293	60.4657	1672	1587	100	0.96	Good	Human, Homo sapiens	2018-05-06	2018-05-30 16:23:30	2018-05-30 16:23:30	1579	1541	kingdom	1	0.98	0	0	0	0.98	0.96	Not_Removed	Not_Removed	Not_Removed	Not_Removed
694	28025.34	Bifidobacterium	animalis	NA	28025	TF04-14	15	NA	PRJNA482748	SAMN09736869	GCA_003438565.1	QSSU00000000	Feces	WGS	Illumina	1917571	60.4652	1668	1590	100	0.96	Good	Human, Homo sapiens	2018-08-31	2018-10-02 04:52:54	2018-10-02 04:52:54	1571	1533	kingdom	1	0.98	0	0	0	0.98	0.96	Not_Removed	Not_Removed	Not_Removed	Not_Removed
695	28025.35	Bifidobacterium	animalis	NA	28025	OM05-7AA	17	NA	PRJNA482748	SAMN09736809	GCA_003438945.1	QSUF00000000	Feces	WGS	Illumina	1916778	60.4652	1664	1586	100	0.96	Good	Human, Homo sapiens	2018-08-31	2018-10-02 05:01:22	2018-10-02 05:01:22	1571	1533	kingdom	1	0.98	0	0	0	0.98	0.96	Not_Removed	Not_Removed	Not_Removed	Not_Removed
696	28026.102	Bifidobacterium	pseudocatenulatum	NA	28026	1896B	15	NA	PRJNA379831	SAMN06621714	GCA_002075945.1	NAQD00000000	Milk	WGS	Unknown	2197471	56.15	1844	1733	100	0.96	Good	Human, Homo sapiens	2017-03-31	2017-05-28 06:01:10	2017-05-28 06:01:10	1751	1709	kingdom	1	0.98	0	0	0	0.96	0.94	Not_Removed	Not_Removed	Not_Removed	Not_Removed
697	28026.1025	Bifidobacterium	pseudocatenulatum	NA	28026	1001285H_161024_F4	14	NA	PRJNA637878	SAMN15532468		JADMZT000000000	Feces	WGS	Illumina	2153040	56.3538	1812	NA	NA	0.96	Good	Human, Homo sapiens	2020-11-17	2020-11-30 15:27:30	2020-11-30 15:27:30	1724	1691	kingdom	1	0.98	0	0	0	0.96	0.94	Not_Removed	Not_Removed	Not_Removed	Not_Removed
698	28026.1026	Bifidobacterium	pseudocatenulatum	NA	28026	1001271B_151109_H7	35	NA	PRJNA637878	SAMN15533169		JADNAO010000010,JADNAO010000011,JADNAO010000012,JADNAO010000013,JADNAO010000014,JADNAO010000015,JADNAO010000016	Feces	WGS	Illumina	2176788	56.2034	1836	NA	NA	0.96	Good	Human, Homo sapiens	2020-11-17	2020-11-30 15:28:28	2020-11-30 15:28:28	1746	1714	kingdom	1	0.98	0	0	0	0.96	0.94	Not_Removed	Not_Removed	Not_Removed	Not_Removed
699	28026.1027	Bifidobacterium	pseudocatenulatum	NA	28026	D6t1_180914_B11	20	NA	PRJNA637878	SAMN15532542		JADNCZ010000010,JADNCZ010000011,JADNCZ010000012,JADNCZ010000013,JADNCZ010000014,JADNCZ010000015,JADNCZ010000016	Feces	WGS	Illumina	2356960	56.5735	2059	NA	NA	0.96	Good	Human, Homo sapiens	2020-11-17	2020-11-30 15:37:41	2020-11-30 15:37:41	1949	1867	kingdom	1	0.96	0	0	0	0.95	0.91	Not_Removed	Not_Removed	Not_Removed	Not_Removed
700	28026.1028	Bifidobacterium	pseudocatenulatum	NA	28026	1001287H_170206_E3	19	NA	PRJNA637878	SAMN15533121		JADNDY010000010,JADNDY010000011,JADNDY010000012,JADNDY010000013,JADNDY010000014,JADNDY010000015,JADNDY010000016	Feces	WGS	Illumina	2294304	56.4519	1950	NA	NA	0.96	Good	Human, Homo sapiens	2020-11-17	2020-11-30 15:45:03	2020-11-30 15:45:03	1855	1810	kingdom	1	0.98	0	0	0	0.95	0.93	Not_Removed	Not_Removed	Not_Removed	Not_Removed
701	28026.1029	Bifidobacterium	pseudocatenulatum	NA	28026	1001099B_141217_G10	52	NA	PRJNA637878	SAMN15533241		JADNNG010000036,JADNNG010000037,JADNNG010000038,JADNNG010000006,JADNNG010000039,JADNNG010000040,JADNNG010000041	Feces	WGS	Illumina	2225567	56.206	1947	NA	NA	0.96	Good	Human, Homo sapiens	2020-11-17	2020-11-30 16:23:22	2020-11-30 16:23:22	1865	1811	kingdom	1	0.97	0	0	0	0.94	0.92	Not_Removed	Not_Removed	Not_Removed	Not_Removed
702	28026.103	Bifidobacterium	pseudocatenulatum	NA	28026	BSD2780061689_150309_E11	9	NA	PRJNA637878	SAMN15532887		JADNOA000000000	Feces	WGS	Illumina	2228306	56.1407	1871	NA	NA	0.96	Good	Human, Homo sapiens	2020-11-17	2020-11-30 16:25:32	2020-11-30 16:25:32	1769	1730	kingdom	1	0.98	0	0	0	0.94	0.92	Not_Removed	Not_Removed	Not_Removed	Not_Removed
703	28026.1031	Bifidobacterium	pseudocatenulatum	NA	28026	D6t1_180914_B4	35	NA	PRJNA637878	SAMN15532830		JADMPK010000010,JADMPK010000011,JADMPK010000012,JADMPK010000013,JADMPK010000014,JADMPK010000015,JADMPK010000016	Feces	WGS	Illumina	2385571	56.5718	2065	NA	NA	0.96	Good	Human, Homo sapiens	2020-11-17	2020-11-30 16:47:18	2020-11-30 16:47:18	1972	1891	kingdom	1	0.96	0	0	0	0.94	0.9	Not_Removed	Not_Removed	Not_Removed	Not_Removed
704	28026.1032	Bifidobacterium	pseudocatenulatum	NA	28026	1001262B_160229_B11	10	NA	PRJNA637878	SAMN15533094		JADPEH000000000	Feces	WGS	Illumina	2353546	56.6871	2112	NA	NA	0.96	Good	Human, Homo sapiens	2020-11-23	2021-01-01 16:33:26	2021-01-01 16:33:26	2013	1834	kingdom	1	0.91	0	0	0	0.92	0.84	Not_Removed	Not_Removed	Not_Removed	Not_Removed
705	28026.1033	Bifidobacterium	pseudocatenulatum	NA	28026	1001275B_160808_D7	28	NA	PRJNA637878	SAMN15532408		JADPAP010000010,JADPAP010000011,JADPAP010000012,JADPAP010000013,JADPAP010000014,JADPAP010000015,JADPAP010000016	Feces	WGS	Illumina	2250518	56.1815	1891	NA	NA	0.96	Good	Human, Homo sapiens	2020-11-23	2021-01-02 05:43:50	2021-01-02 05:43:50	1814	1777	phylum	1	0.98	0.44	0.02	0.05	0.96	0.94	Not_Removed	Not_Removed	Not_Removed	Not_Removed
706	28026.1034	Bifidobacterium	pseudocatenulatum	NA	28026	J1101437_171009_A10	22	NA	PRJNA637878	SAMN15532710	GCA_015669825.1	JADPAU010000010,JADPAU010000011,JADPAU010000012,JADPAU010000013,JADPAU010000014,JADPAU010000015,JADPAU010000016	Feces	WGS	Illumina	2212521	56.4714	1890	NA	NA	0.935	Good	Human, Homo sapiens	2020-11-23	2021-01-02 05:43:50	2021-01-02 05:43:50	1823	1770	kingdom	1	0.97	0	0	0	0.95	0.93	Not_Removed	Not_Removed	Not_Removed	Not_Removed
707	28026.128	Bifidobacterium	pseudocatenulatum	NA	28026	TM10-1	11	NA	PRJNA482748	SAMN09737021	GCA_003436025.1	QSOG00000000	Feces	WGS	Illumina	2225345	56.2007	1882	1771	100	0.96	Good	Human, Homo sapiens	2018-08-31	2018-10-02 03:53:59	2018-10-02 03:53:59	1784	1746	kingdom	1	0.98	0	0	0	0.96	0.94	Not_Removed	Not_Removed	Not_Removed	Not_Removed
708	28026.13	Bifidobacterium	pseudocatenulatum	NA	28026	TM07-3AT	10	NA	PRJNA482748	SAMN09737005	GCA_003436315.1	QSOT00000000	Feces	WGS	Illumina	2242522	56.3434	1886	1777	100	0.96	Good	Human, Homo sapiens	2018-08-31	2018-10-02 04:03:38	2018-10-02 04:03:38	1777	1732	kingdom	1	0.97	0	0	0	0.96	0.94	Not_Removed	Not_Removed	Not_Removed	Not_Removed
709	28026.131	Bifidobacterium	pseudocatenulatum	NA	28026	TM04-13	15	NA	PRJNA482748	SAMN09736969	GCA_003436545.1	QSQA00000000	Feces	WGS	Illumina	2264568	56.5222	1941	1815	100	0.96	Good	Human, Homo sapiens	2018-08-31	2018-10-02 04:27:30	2018-10-02 04:27:30	1819	1748	kingdom	1	0.96	0	0	0	0.95	0.91	Not_Removed	Not_Removed	Not_Removed	Not_Removed
710	28026.133	Bifidobacterium	pseudocatenulatum	NA	28026	TF08-3AT	14	NA	PRJNA482748	SAMN09736917	GCA_003436955.1	QSRI00000000	Feces	WGS	Illumina	2261675	56.3103	1943	1826	100	0.96	Good	Human, Homo sapiens	2018-08-31	2018-10-02 04:20:28	2018-10-02 04:20:28	1825	1764	kingdom	1	0.97	0	0	0	0.95	0.92	Not_Removed	Not_Removed	Not_Removed	Not_Removed
711	28026.134	Bifidobacterium	pseudocatenulatum	NA	28026	TF07-45	17	NA	PRJNA482748	SAMN09736909	GCA_003437075.1	QSRN00000000	Feces	WGS	Illumina	2383735	56.6029	2134	1977	100	0.96	Good	Human, Homo sapiens	2018-08-31	2018-10-02 04:39:32	2018-10-02 04:39:32	2012	1889	kingdom	1	0.94	0	0	0	0.93	0.87	Not_Removed	Not_Removed	Not_Removed	Not_Removed
712	28026.135	Bifidobacterium	pseudocatenulatum	NA	28026	TF07-23	19	NA	PRJNA482748	SAMN09736905	GCA_003437155.1	QSRR00000000	Feces	WGS	Illumina	2338335	56.6954	2029	1898	100	0.96	Good	Human, Homo sapiens	2018-08-31	2018-10-02 04:41:36	2018-10-02 04:41:36	1914	1830	kingdom	1	0.96	0	0	0	0.94	0.9	Not_Removed	Not_Removed	Not_Removed	Not_Removed
713	28026.136	Bifidobacterium	pseudocatenulatum	NA	28026	TM05-11	22	NA	PRJNA482748	SAMN09736977	GCA_003437435.1	QSPS00000000	Feces	WGS	Illumina	2294189	56.4201	2017	1892	100	0.96	Good	Human, Homo sapiens	2018-08-31	2018-10-02 04:29:54	2018-10-02 04:29:54	1901	1838	kingdom	1	0.97	0	0	0	0.94	0.91	Not_Removed	Not_Removed	Not_Removed	Not_Removed
714	28026.137	Bifidobacterium	pseudocatenulatum	NA	28026	TF05-2AC	6	NA	PRJNA482748	SAMN09736882	GCA_003437825.1	QSSK00000000	Feces	WGS	Illumina	2206288	56.6013	1916	1800	100	0.96	Good	Human, Homo sapiens	2018-08-31	2018-10-02 04:55:40	2018-10-02 04:55:40	1807	1760	kingdom	1	0.97	0	0	0	0.96	0.93	Not_Removed	Not_Removed	Not_Removed	Not_Removed
715	28026.138	Bifidobacterium	pseudocatenulatum	NA	28026	TF05-19AC	13	NA	PRJNA482748	SAMN09736879	GCA_003437835.1	QSSM00000000	Feces	WGS	Illumina	2176405	56.4276	1876	1748	100	0.96	Good	Human, Homo sapiens	2018-08-31	2018-10-02 04:39:58	2018-10-02 04:39:58	1764	1720	kingdom	1	0.98	0	0	0	0.96	0.93	Not_Removed	Not_Removed	Not_Removed	Not_Removed
716	28026.14	Bifidobacterium	pseudocatenulatum	NA	28026	OM05-2	16	NA	PRJNA482748	SAMN09736800	GCA_003438405.1	QSUK00000000	Feces	WGS	Illumina	2365404	56.6192	2067	1936	100	0.96	Good	Human, Homo sapiens	2018-08-31	2018-10-02 05:05:58	2018-10-02 05:05:58	1947	1849	kingdom	1	0.95	0	0	0	0.93	0.88	Not_Removed	Not_Removed	Not_Removed	Not_Removed
717	28026.141	Bifidobacterium	pseudocatenulatum	NA	28026	OF05-12	13	NA	PRJNA482748	SAMN09736713	GCA_003439655.1	QSWD00000000	Feces	WGS	Illumina	2369746	56.7634	2141	1980	100	0.96	Good	Human, Homo sapiens	2018-08-31	2018-10-02 05:15:51	2018-10-02 05:15:51	1998	1899	kingdom	1	0.95	0	0	0	0.93	0.89	Not_Removed	Not_Removed	Not_Removed	Not_Removed
718	28026.142	Bifidobacterium	pseudocatenulatum	NA	28026	AF26-1	11	NA	PRJNA482748	SAMN09734507	GCA_003458965.1	QRTZ00000000	Feces	WGS	Illumina	2183304	56.5636	1927	1791	100	0.96	Good	Human, Homo sapiens	2018-09-05	2018-10-02 09:28:08	2018-10-02 09:28:08	1810	1745	kingdom	1	0.96	0	0	0	0.95	0.92	Not_Removed	Not_Removed	Not_Removed	Not_Removed
719	28026.143	Bifidobacterium	pseudocatenulatum	NA	28026	AF20-20AC	11	NA	PRJNA482748	SAMN09734414	GCA_003459475.1	QRWB00000000	Feces	WGS	Illumina	2249138	56.4994	1931	1817	100	0.96	Good	Human, Homo sapiens	2018-09-05	2018-10-02 09:34:56	2018-10-02 09:34:56	1820	1752	kingdom	1	0.96	0	0	0	0.95	0.91	Not_Removed	Not_Removed	Not_Removed	Not_Removed
720	28026.145	Bifidobacterium	pseudocatenulatum	NA	28026	AF17-20AC	16	NA	PRJNA482748	SAMN09734331	GCA_003460425.1	QRXU00000000	Feces	WGS	Illumina	2238891	56.2173	1916	1793	100	0.96	Good	Human, Homo sapiens	2018-09-05	2018-10-02 09:58:42	2018-10-02 09:58:42	1803	1767	kingdom	1	0.98	0	0	0	0.95	0.93	Not_Removed	Not_Removed	Not_Removed	Not_Removed
721	28026.147	Bifidobacterium	pseudocatenulatum	NA	28026	OF01-8	18	NA	PRJNA482748	SAMN09736676	GCA_003463425.1	QSCX00000000	Feces	WGS	Illumina	2287849	56.6047	1985	1868	100	0.96	Good	Human, Homo sapiens	2018-09-06	2018-10-02 10:32:35	2018-10-02 10:32:35	1879	1800	kingdom	1	0.96	0	0	0	0.94	0.9	Not_Removed	Not_Removed	Not_Removed	Not_Removed
722	28026.148	Bifidobacterium	pseudocatenulatum	NA	28026	OF01-2	20	NA	PRJNA482748	SAMN09736669	GCA_003463455.1	QSDA00000000	Feces	WGS	Illumina	2248920	56.4982	1942	1823	100	0.96	Good	Human, Homo sapiens	2018-09-06	2018-10-02 10:32:46	2018-10-02 10:32:46	1830	1760	kingdom	1	0.96	0	0	0	0.95	0.91	Not_Removed	Not_Removed	Not_Removed	Not_Removed
723	28026.149	Bifidobacterium	pseudocatenulatum	NA	28026	OF01-12	15	NA	PRJNA482748	SAMN09736662	GCA_003463505.1	QSDF00000000	Feces	WGS	Illumina	2284655	56.6011	1984	1865	100	0.96	Good	Human, Homo sapiens	2018-09-06	2018-10-02 10:36:33	2018-10-02 10:36:33	1879	1798	kingdom	1	0.96	0	0	0	0.94	0.9	Not_Removed	Not_Removed	Not_Removed	Not_Removed
724	28026.151	Bifidobacterium	pseudocatenulatum	NA	28026	AF12-8LB-d	14	NA	PRJNA482748	SAMN09734227	GCA_003464925.1	QSAC00000000	Feces	WGS	Illumina	2202985	56.2011	1923	1780	100	0.96	Good	Human, Homo sapiens	2018-09-06	2018-10-02 11:05:23	2018-10-02 11:05:23	1790	1750	kingdom	1	0.98	0	0	0	0.96	0.94	Not_Removed	Not_Removed	Not_Removed	Not_Removed
725	28026.152	Bifidobacterium	pseudocatenulatum	NA	28026	AF12-10-6.0	16	NA	PRJNA482748	SAMN09734213	GCA_003465065.1	QSAK00000000	Feces	WGS	Illumina	2202226	56.2014	1919	1777	100	0.96	Good	Human, Homo sapiens	2018-09-06	2018-10-02 11:07:30	2018-10-02 11:07:30	1788	1748	kingdom	1	0.98	0	0	0	0.96	0.94	Not_Removed	Not_Removed	Not_Removed	Not_Removed
726	28026.153	Bifidobacterium	pseudocatenulatum	NA	28026	AF11-18	9	NA	PRJNA482748	SAMN09734208	GCA_003465135.1	QSAP00000000	Feces	WGS	Illumina	2267953	56.198	1924	1809	100	0.96	Good	Human, Homo sapiens	2018-09-06	2018-10-02 11:10:32	2018-10-02 11:10:32	1819	1768	kingdom	1	0.97	0	0	0	0.96	0.93	Not_Removed	Not_Removed	Not_Removed	Not_Removed
727	28026.154	Bifidobacterium	pseudocatenulatum	NA	28026	AF12-8A-LB	16	NA	PRJNA482748	SAMN09734226	GCA_003465385.1	QSAD00000000	Feces	WGS	Illumina	2203776	56.2044	1922	1779	100	0.96	Good	Human, Homo sapiens	2018-09-06	2018-10-02 11:12:19	2018-10-02 11:12:19	1792	1753	kingdom	1	0.98	0	0	0	0.96	0.94	Not_Removed	Not_Removed	Not_Removed	Not_Removed
728	28026.155	Bifidobacterium	pseudocatenulatum	NA	28026	AF03-28	18	NA	PRJNA482748	SAMN09734173	GCA_003465775.1	QSBP00000000	Feces	WGS	Illumina	2360283	56.5622	2052	1907	100	0.96	Good	Human, Homo sapiens	2018-09-06	2018-10-02 11:18:35	2018-10-02 11:18:35	1929	1838	kingdom	1	0.95	0	0	0	0.95	0.9	Not_Removed	Not_Removed	Not_Removed	Not_Removed
729	28026.156	Bifidobacterium	pseudocatenulatum	NA	28026	AF02-36-1	16	NA	PRJNA482748	SAMN09734165	GCA_003466105.1	QSBW00000000	Feces	WGS	Illumina	2185103	56.2857	1893	1750	100	0.96	Good	Human, Homo sapiens	2018-09-06	2018-10-02 11:22:42	2018-10-02 11:22:42	1764	1726	kingdom	1	0.98	0	0	0	0.96	0.94	Not_Removed	Not_Removed	Not_Removed	Not_Removed
730	28026.157	Bifidobacterium	pseudocatenulatum	NA	28026	AM43-10	7	NA	PRJNA482748	SAMN09736560	GCA_003467065.1	QSFQ00000000	Feces	WGS	Illumina	2198965	56.5416	1885	1756	100	0.96	Good	Human, Homo sapiens	2018-09-06	2018-10-02 11:35:52	2018-10-02 11:35:52	1771	1735	kingdom	1	0.98	0	0	0	0.96	0.94	Not_Removed	Not_Removed	Not_Removed	Not_Removed
731	28026.158	Bifidobacterium	pseudocatenulatum	NA	28026	AM38-8	12	NA	PRJNA482748	SAMN09736506	GCA_003467515.1	QSHB00000000	Feces	WGS	Illumina	2309250	56.248	1997	1864	100	0.96	Good	Human, Homo sapiens	2018-09-06	2018-10-02 11:46:14	2018-10-02 11:46:14	1867	1795	kingdom	1	0.96	0	0	0	0.95	0.91	Not_Removed	Not_Removed	Not_Removed	Not_Removed
732	28026.159	Bifidobacterium	pseudocatenulatum	NA	28026	AM36-5BH	18	NA	PRJNA482748	SAMN09736486	GCA_003467755.1	QSHR00000000	Feces	WGS	Illumina	2163900	56.2332	1885	1753	100	0.96	Good	Human, Homo sapiens	2018-09-06	2018-10-02 11:47:54	2018-10-02 11:47:54	1746	1709	phylum	1	0.98	0.22	0.02	0.04	0.95	0.93	Not_Removed	Not_Removed	Not_Removed	Not_Removed
733	28026.16	Bifidobacterium	pseudocatenulatum	NA	28026	AM36-2AC	17	NA	PRJNA482748	SAMN09736481	GCA_003467785.1	QSHV00000000	Feces	WGS	Illumina	2163183	56.233	1877	1752	100	0.96	Good	Human, Homo sapiens	2018-09-06	2018-10-02 11:49:08	2018-10-02 11:49:08	1750	1711	phylum	1	0.98	0.22	0.02	0.04	0.95	0.93	Not_Removed	Not_Removed	Not_Removed	Not_Removed
734	28026.161	Bifidobacterium	pseudocatenulatum	NA	28026	AM33-6	13	NA	PRJNA482748	SAMN09736456	GCA_003468555.1	QSIM00000000	Feces	WGS	Illumina	2261451	56.4314	1956	1837	100	0.96	Good	Human, Homo sapiens	2018-09-06	2018-10-02 12:09:35	2018-10-02 12:09:35	1838	1776	kingdom	1	0.97	0	0	0	0.95	0.92	Not_Removed	Not_Removed	Not_Removed	Not_Removed
735	28026.162	Bifidobacterium	pseudocatenulatum	NA	28026	AM26-14LB	13	NA	PRJNA482748	SAMN09736330	GCA_003470125.1	QSLD00000000	Feces	WGS	Illumina	2218563	56.2316	1910	1795	100	0.96	Good	Human, Homo sapiens	2018-09-06	2018-10-02 12:29:51	2018-10-02 12:29:51	1803	1751	kingdom	1	0.97	0	0	0	0.96	0.93	Not_Removed	Not_Removed	Not_Removed	Not_Removed
736	28026.164	Bifidobacterium	pseudocatenulatum	NA	28026	AM20-9-6.0	18	NA	PRJNA482748	SAMN09734886	GCA_003471295.1	QRIU00000000	Feces	WGS	Illumina	2159427	56.3176	1880	1759	100	0.96	Good	Human, Homo sapiens	2018-09-06	2018-10-02 12:44:20	2018-10-02 12:44:20	1770	1713	kingdom	1	0.97	0	0	0	0.96	0.93	Not_Removed	Not_Removed	Not_Removed	Not_Removed
737	28026.165	Bifidobacterium	pseudocatenulatum	NA	28026	AM20-6	13	NA	PRJNA482748	SAMN09734885	GCA_003471325.1	QRIV00000000	Feces	WGS	Illumina	2230637	56.5796	1968	1844	100	0.96	Good	Human, Homo sapiens	2018-09-06	2018-10-02 15:05:26	2018-10-02 15:05:26	1847	1791	kingdom	1	0.97	0	0	0	0.95	0.92	Not_Removed	Not_Removed	Not_Removed	Not_Removed
738	28026.166	Bifidobacterium	pseudocatenulatum	NA	28026	AM20-1	13	NA	PRJNA482748	SAMN09734879	GCA_003471415.1	QRJB00000000	Feces	WGS	Illumina	2237967	56.572	1974	1849	100	0.96	Good	Human, Homo sapiens	2018-09-06	2018-10-02 15:05:16	2018-10-02 15:05:16	1855	1796	kingdom	1	0.97	0	0	0	0.95	0.92	Not_Removed	Not_Removed	Not_Removed	Not_Removed
739	28026.167	Bifidobacterium	pseudocatenulatum	NA	28026	AM18-42	9	NA	PRJNA482748	SAMN09734871	GCA_003471505.1	QRJG00000000	Feces	WGS	Illumina	2225059	56.2353	1913	1778	100	0.96	Good	Human, Homo sapiens	2018-09-06	2018-10-02 14:51:18	2018-10-02 14:51:18	1779	1741	kingdom	1	0.98	0	0	0	0.95	0.93	Not_Removed	Not_Removed	Not_Removed	Not_Removed
740	28026.168	Bifidobacterium	pseudocatenulatum	NA	28026	AM11-10	18	NA	PRJNA482748	SAMN09734778	GCA_003472415.1	QRLX00000000	Feces	WGS	Illumina	2336191	56.4868	2061	1928	100	0.96	Good	Human, Homo sapiens	2018-09-06	2018-10-02 15:09:58	2018-10-02 15:09:58	1943	1801	kingdom	1	0.93	0	0	0	0.94	0.87	Not_Removed	Not_Removed	Not_Removed	Not_Removed
741	28026.169	Bifidobacterium	pseudocatenulatum	NA	28026	AM10-24	16	NA	PRJNA482748	SAMN09734769	GCA_003472545.1	QRMD00000000	Feces	WGS	Illumina	2142379	56.4468	1874	1746	100	0.96	Good	Human, Homo sapiens	2018-09-06	2018-10-02 15:34:32	2018-10-02 15:34:32	1754	1702	kingdom	1	0.97	0	0	0	0.95	0.92	Not_Removed	Not_Removed	Not_Removed	Not_Removed
742	28026.17	Bifidobacterium	pseudocatenulatum	NA	28026	AM10-2	13	NA	PRJNA482748	SAMN09734766	GCA_003472575.1	QRMF00000000	Feces	WGS	Illumina	2142870	56.4477	1869	1743	100	0.96	Good	Human, Homo sapiens	2018-09-06	2018-10-02 15:33:52	2018-10-02 15:33:52	1749	1701	kingdom	1	0.97	0	0	0	0.95	0.93	Not_Removed	Not_Removed	Not_Removed	Not_Removed
743	28026.171	Bifidobacterium	pseudocatenulatum	NA	28026	AM08-25	21	NA	PRJNA482748	SAMN09734749	GCA_003472685.1	QRMQ00000000	Feces	WGS	Illumina	2339457	56.4487	2000	1872	100	0.96	Good	Human, Homo sapiens	2018-09-06	2018-10-02 15:13:22	2018-10-02 15:13:22	1876	1809	kingdom	1	0.96	0	0	0	0.95	0.91	Not_Removed	Not_Removed	Not_Removed	Not_Removed
744	28026.172	Bifidobacterium	pseudocatenulatum	NA	28026	AM08-2	24	NA	PRJNA482748	SAMN09734748	GCA_003472725.1	QRMR00000000	Feces	WGS	Illumina	2327048	56.4667	2000	1871	100	0.96	Good	Human, Homo sapiens	2018-09-06	2018-10-02 15:13:44	2018-10-02 15:13:44	1878	1805	kingdom	1	0.96	0	0	0	0.95	0.91	Not_Removed	Not_Removed	Not_Removed	Not_Removed
745	28026.173	Bifidobacterium	pseudocatenulatum	NA	28026	AM13-8	16	NA	PRJNA482748	SAMN09734801	GCA_003473025.1	QRLC00000000	Feces	WGS	Illumina	2216375	56.2856	1916	1808	100	0.96	Good	Human, Homo sapiens	2018-09-06	2018-10-02 15:20:30	2018-10-02 15:20:30	1810	1757	kingdom	1	0.97	0	0	0	0.95	0.92	Not_Removed	Not_Removed	Not_Removed	Not_Removed
746	28026.174	Bifidobacterium	pseudocatenulatum	NA	28026	AM13-2	14	NA	PRJNA482748	SAMN09734796	GCA_003473115.1	QRLG00000000	Feces	WGS	Illumina	2214411	56.2901	1906	1797	100	0.96	Good	Human, Homo sapiens	2018-09-06	2018-10-02 15:22:17	2018-10-02 15:22:17	1797	1750	kingdom	1	0.97	0	0	0	0.95	0.93	Not_Removed	Not_Removed	Not_Removed	Not_Removed
747	28026.177	Bifidobacterium	pseudocatenulatum	NA	28026	AF36-12AT	18	NA	PRJNA482748	SAMN09734638	GCA_003474835.1	QRPH00000000	Feces	WGS	Illumina	2359221	56.6032	2120	1979	100	0.96	Good	Human, Homo sapiens	2018-09-06	2018-10-02 16:09:38	2018-10-02 16:09:38	1983	1894	kingdom	1	0.96	0	0	0	0.93	0.89	Not_Removed	Not_Removed	Not_Removed	Not_Removed
748	28026.27	Bifidobacterium	pseudocatenulatum	NA	28026	CA-05	24	27340092	PRJDB4597	SAMD00047609	GCF_001685965.1	BCXY00000000	Infant feces	WGS	Illumina	2223124	56.45	1872	NA	100	0.96	Good	Human, Homo sapiens	2016-07-09	2016-09-11 13:55:42	2016-09-11 13:55:42	1797	1746	kingdom	1	0.97	0	0	0	0.95	0.93	Not_Removed	Not_Removed	Not_Removed	Not_Removed
749	28026.28	Bifidobacterium	pseudocatenulatum	NA	28026	CA-B29	43	27340092	PRJDB4597	SAMD00047610	GCF_001685985.1	BCXZ00000000	Infant feces	WGS	Illumina	2300700	56.43	1946	NA	100	0.96	Good	Human, Homo sapiens	2016-07-09	2016-09-11 13:58:25	2016-09-11 13:58:25	1856	1774	kingdom	1	0.96	0	0	0	0.95	0.91	Not_Removed	Not_Removed	Not_Removed	Not_Removed
750	28026.29	Bifidobacterium	pseudocatenulatum	NA	28026	CA-C29	72	27340092	PRJDB4597	SAMD00047611	GCF_001686005.1	BCYA00000000	Infant feces	WGS	Illumina	2182067	56.26	1883	NA	100	0.96	Good	Human, Homo sapiens	2016-07-09	2016-09-11 14:01:50	2016-09-11 14:01:50	1801	1756	kingdom	1	0.98	0	0	0	0.97	0.94	Not_Removed	Not_Removed	Not_Removed	Not_Removed
751	28026.3	Bifidobacterium	pseudocatenulatum	NA	28026	CA-D29	86	27340092	PRJDB4597	SAMD00047612	GCF_001686025.1	BCYB00000000	Infant feces	WGS	Illumina	2264683	56.34	2001	NA	100	0.96	Good	Human, Homo sapiens	2016-07-09	2016-09-11 14:03:13	2016-09-11 14:03:13	1916	1831	kingdom	1	0.96	0	0	0	0.95	0.91	Not_Removed	Not_Removed	Not_Removed	Not_Removed
752	28026.31	Bifidobacterium	pseudocatenulatum	NA	28026	CA-K29a	59	27340092	PRJDB4597	SAMD00047613	GCF_001686045.1	BCYC00000000	Infant feces	WGS	Illumina	2458506	56.41	2212	NA	100	0.96	Good	Human, Homo sapiens	2016-07-09	2016-09-11 14:06:50	2016-09-11 14:06:50	2115	1938	kingdom	1	0.92	0	0	0	0.93	0.85	Not_Removed	Not_Removed	Not_Removed	Not_Removed
753	28026.32	Bifidobacterium	pseudocatenulatum	NA	28026	CA-K29b	66	27340092	PRJDB4597	SAMD00047614	GCF_001686065.1	BCYD00000000	Infant feces	WGS	Illumina	2453340	56.67	2206	NA	100	0.952	Good	Human, Homo sapiens	2016-07-09	2016-09-11 14:05:27	2016-09-11 14:05:27	2125	2008	kingdom	1	0.94	0	0	0	0.93	0.88	Not_Removed	Not_Removed	Not_Removed	Not_Removed
754	28026.752	Bifidobacterium	pseudocatenulatum	NA	28026	1001271st1_F3	17	NA	PRJNA518912	SAMN10863262	GCA_005844335.1	SPFZ00000000	Feces	WGS	Illumina	2180828	56.21	1821	NA	NA	0.96	Good	Human, Homo sapiens	2019-05-26	2019-07-17 01:46:37	2019-07-17 01:46:37	1735	1704	kingdom	1	0.98	0	0	0	0.96	0.94	Not_Removed	Not_Removed	Not_Removed	Not_Removed
755	28026.753	Bifidobacterium	pseudocatenulatum	NA	28026	ca_0067	6	30630933	PRJNA496358	SAMN10239588	GCA_004167565.1	RCXS00000000	Feces	WGS	Illumina	2106190	56.3441	1808	1698	NA	0.96	Good	Human, Homo sapiens	2019-02-11	2019-07-17 01:50:30	2019-07-17 01:50:30	1696	1660	kingdom	1	0.98	0	0	0	0.96	0.94	Not_Removed	Not_Removed	Not_Removed	Not_Removed
756	28026.771	Bifidobacterium	pseudocatenulatum	NA	28026	S04C.meta.bin_4	32	31384000	PRJNA492716	SAMN10316555	GCA_008672315.1	RPWP00000000	Feces	WGS	Illumina	2371191	56.5602	2049	NA	NA	0.96	Good	Human, Homo sapiens	2019-09-23	2019-10-02 14:33:11	2019-10-02 14:33:11	1953	1847	kingdom	1	0.95	0	0	0	0.94	0.89	Not_Removed	Not_Removed	Not_Removed	Not_Removed
757	28026.772	Bifidobacterium	pseudocatenulatum	NA	28026	S04B.meta.bin_5	35	31384000	PRJNA492716	SAMN10316549	GCA_008672455.1	RPWJ00000000	Feces	WGS	Illumina	2369924	56.5708	2049	NA	NA	0.96	Good	Human, Homo sapiens	2019-09-23	2019-10-02 14:34:19	2019-10-02 14:34:19	1943	1840	kingdom	1	0.95	0	0	0	0.94	0.89	Not_Removed	Not_Removed	Not_Removed	Not_Removed
758	28026.773	Bifidobacterium	pseudocatenulatum	NA	28026	S04A.meta.bin_3	35	31384000	PRJNA492716	SAMN10316538	GCA_008672675.1	RPVY00000000	Feces	WGS	Illumina	2369364	56.5828	2041	NA	NA	0.952	Good	Human, Homo sapiens	2019-09-23	2019-10-02 14:36:54	2019-10-02 14:36:54	1948	1842	kingdom	1	0.95	0	0	0	0.94	0.89	Not_Removed	Not_Removed	Not_Removed	Not_Removed
759	28026.774	Bifidobacterium	pseudocatenulatum	NA	28026	LMAG:68	7	31455406	PRJNA362284	SAMN06546872	GCA_008679875.1	NAMH00000000	Feces	WGS	PacBio	2173340	56.3783	1876	NA	NA	0.96	Good	Human, Homo sapiens	2019-09-23	2019-10-02 15:07:48	2019-10-02 15:07:48	1755	1712	kingdom	1	0.98	0	0	0	0.96	0.94	Not_Removed	Not_Removed	Not_Removed	Not_Removed
760	28026.775	Bifidobacterium	pseudocatenulatum	NA	28026	LMAG:55	1	31455406	PRJNA362284	SAMN06546859	GCA_008680165.1	NALU00000000	Feces	WGS	PacBio	2034231	56.3285	1728	NA	NA	0.944	Good	Human, Homo sapiens	2019-09-23	2019-10-02 15:12:11	2019-10-02 15:12:11	1645	1603	kingdom	1	0.97	0	0	0	0.96	0.93	Not_Removed	Not_Removed	Not_Removed	Not_Removed
761	28026.776	Bifidobacterium	pseudocatenulatum	NA	28026	LMAG:32	4	31455406	PRJNA362284	SAMN06546836	GCA_008680605.1	NAKX00000000	Feces	WGS	PacBio	2302895	56.3075	2007	NA	NA	0.927	Good	Human, Homo sapiens	2019-09-23	2019-10-02 15:18:32	2019-10-02 15:18:32	1907	1835	kingdom	1	0.96	0	0	0	0.96	0.92	Not_Removed	Not_Removed	Not_Removed	Not_Removed
762	28026.84	Bifidobacterium	pseudocatenulatum	NA	28026	Bif4	58	NA	PRJNA451351	SAMN08968793		QCZO00000000	Feces	WGS	Illumina	2214245	56.4683	1917	1781	NA	0.96	Good	Human, Homo sapiens	2020-02-24	2020-03-27 14:10:15	2020-03-27 14:10:15	1816	1738	kingdom	1	0.96	0	0	0	0.96	0.91	Not_Removed	Not_Removed	Not_Removed	Not_Removed
763	302911.12	Bifidobacterium	animalis	subsp. lactis	302911	BIO5764	13	NA	PRJNA574342	SAMN12856544	GCA_008868455.1	WBNU00000000	Milk	WGS	Illumina	1920179	60.467	1670	1590	NA	0.96	Good	Human, Homo sapiens	2019-10-07	2019-10-27 20:57:23	2019-10-27 20:57:23	1580	1542	kingdom	1	0.98	0	0	0	0.98	0.96	Not_Removed	Not_Removed	Not_Removed	Not_Removed
764	302911.124	Bifidobacterium	animalis	subsp. lactis	302911	MN-Gup	26	NA	PRJNA594794	SAMN13530334		WTKQ00000000	Intestine	WGS	Illumina	1917013	60.4641	1641	1546	NA	0.96	Good	Human, Homo sapiens	2020-01-08	2020-02-01 01:23:13	2020-02-01 01:23:13	1577	1536	kingdom	1	0.97	0	0	0	0.98	0.95	Not_Removed	Not_Removed	Not_Removed	Not_Removed
765	302911.25	Bifidobacterium	animalis	subsp. lactis	302911	BF052	1	NA	PRJNA252546	SAMN02941905	GCA_000818055.1	CP009045.1	Infant feces	Complete	Illumina	1938624	60.48	1612	1536	100	0.96	Good	Human, Homo sapiens	2015-01-14	2015-03-12 13:53:10	2015-03-16 03:17:09	1577	1541	kingdom	1	0.98	0	0	0	0.98	0.96	Not_Removed	Not_Removed	Not_Removed	Not_Removed
766	302911.26	Bifidobacterium	animalis	subsp. lactis	302911	646	21	NA	PRJNA348834	SAMN05916063	GCF_001892925.1	MLZL00000000	Feces	WGS	Ion Torrent	1923287	60.48	1671	1585	100	0.952	Good	Human, Homo sapiens	2016-12-08	2017-01-16 09:22:56	2017-01-16 09:22:56	1609	1571	kingdom	1	0.98	0	0	0	0.98	0.95	Not_Removed	Not_Removed	Not_Removed	Not_Removed
767	302911.56	Bifidobacterium	animalis	subsp. lactis	302911	DS24_2	36	NA	PRJNA336518	SAMN08948998	GCA_003094815.1	QDIN00000000	Others	WGS	Illumina	1924949	60.4516	1685	1602	100	0.96	Good	Human, Homo sapiens	2018-05-06	2018-05-27 22:35:40	2018-05-27 22:35:40	1591	1547	kingdom	1	0.97	0	0	0	0.98	0.95	Not_Removed	Not_Removed	Not_Removed	Not_Removed
768	302911.57	Bifidobacterium	animalis	subsp. lactis	302911	DS28_2	17	NA	PRJNA336518	SAMN08949000	GCA_003095015.1	QDIK00000000	Others	WGS	Illumina	1918800	60.4612	1664	1588	100	0.96	Good	Human, Homo sapiens	2018-05-06	2018-05-30 16:22:04	2018-05-30 16:22:04	1571	1534	kingdom	1	0.98	0	0	0	0.98	0.96	Not_Removed	Not_Removed	Not_Removed	Not_Removed
769	302911.59	Bifidobacterium	animalis	subsp. lactis	302911	DS23_2	114	NA	PRJNA336518	SAMN08948997	GCA_003094835.1	QDIO00000000	Others	WGS	Illumina	1934130	60.5017	1737	1664	100	0.935	Good	Human, Homo sapiens	2018-05-06	2018-05-30 16:23:55	2018-05-30 16:23:55	1656	1614	kingdom	1	0.97	0	0	0	0.98	0.95	Not_Removed	Not_Removed	Not_Removed	Not_Removed
770	302911.6	Bifidobacterium	animalis	subsp. lactis	302911	DS27_2	18	NA	PRJNA336518	SAMN08948999	GCA_003094775.1	QDIL00000000	Others	WGS	Illumina	1920466	60.4619	1670	1588	100	0.96	Good	Human, Homo sapiens	2018-05-06	2018-05-30 16:23:58	2018-05-30 16:23:58	1580	1541	kingdom	1	0.98	0	0	0	0.98	0.96	Not_Removed	Not_Removed	Not_Removed	Not_Removed
771	302911.62	Bifidobacterium	animalis	subsp. lactis	302911	S7	1	NA	PRJNA397826	SAMN07488464	GCA_003390755.1	CP022724	Adult feces	Complete	PacBio	1944072	60.4879	1695	1593	100	0.952	Good	Human, Homo sapiens	2018-08-15	2018-09-30 16:44:42	2018-09-30 16:44:42	1605	1569	kingdom	1	0.98	0	0	0	0.98	0.96	Not_Removed	Not_Removed	Not_Removed	Not_Removed
772	302911.63	Bifidobacterium	animalis	subsp. lactis	302911	IDCC4301	1	NA	PRJNA486607	SAMN09858435	GCA_003428375.1	CP031703	Infant feces	Complete	Illumina|PacBio	1944141	60.4893	1664	1595	100	0.96	Good	Human, Homo sapiens	2018-08-26	2018-10-01 23:00:55	2018-10-01 23:00:55	1586	1548	kingdom	1	0.98	0	0	0	0.98	0.95	Not_Removed	Not_Removed	Not_Removed	Not_Removed
773	302912.1	Bifidobacterium	animalis	subsp. animalis	302912	CNCM I-4602	1	NA	PRJNA445301	SAMN08774047	GCA_003671995.1	CP028460	NA	Complete	PacBio	1932687	60.4748	1613	1509	NA	0.96	Good	Human, Homo sapiens	2018-10-22	2018-11-29 03:24:37	2018-11-29 03:24:37	1562	1518	kingdom	1	0.97	0	0	0	0.93	0.9	Not_Removed	Not_Removed	Not_Removed	Not_Removed
774	326426.4	Bifidobacterium	breve	NA	326426	UCC2003	1	21690406	PRJNA13487	SAMN02604112	GCA_000220135.1	CP000303	Infant feces	Complete	Unknown	2422684	58	2071	1854	100	0.952	Good	Human, Homo sapiens	2011-07-06	2014-12-08 22:10:28	2015-03-16 03:17:09	2050	1992	kingdom	1	0.97	0	0	0	0.93	0.91	Not_Removed	Not_Removed	Not_Removed	Not_Removed
775	33010.9	Cutibacterium	avidum	NA	33010	P313	48	NA	PRJNA524452	SAMN11026534	GCA_005796055.1	VBRS00000000	Infant feces	WGS	Illumina	2630617	63.4549	2550	2386	NA	1	Good	Human, Homo sapiens	2019-05-23	2019-07-17 11:34:33	2019-07-17 11:34:33	2381	2279	genus	0.91	0.87	0.06	0.04	0.07	0.95	0.83	Not_Removed	Removed	Not_Removed	Removed
776	391904.5	Bifidobacterium	longum	subsp. infantis	391904	ATCC 15697	1	19033196	PRJNA17189		GCA_000020425.1	CP001095	Infant feces	Complete	Unknown	2832748	59.9	2511	2416	100	0.944	Good	Human, Homo sapiens	2008-11-20	2014-12-08 22:10:28	2015-03-16 03:17:09	2568	2300	kingdom	1	0.9	0	0	0	0.85	0.76	Not_Removed	Not_Removed	Not_Removed	Not_Removed
777	398513.13	Bifidobacterium	bifidum	NA	398513	NCIMB 41171	1	22829535	PRJNA30055	SAMN02463676	GCF_000273525.1	AKCA00000000	NA	Complete	Illumina|PacBio	2216395	62.81	1905	NA	100	0.96	Good	Human, Homo sapiens	2012-06-15	2016-01-17 15:28:59	2016-01-17 15:28:59	1837	1772	kingdom	1	0.96	0	0	0	0.95	0.92	Not_Removed	Not_Removed	Not_Removed	Not_Removed
778	398513.5	Bifidobacterium	bifidum	NA	398513	NCIMB 41171	9	NA	PRJNA30055	SAMN02463676	GCA_000155395.1	ABQP00000000	NA	WGS	Roche 454	2202695	62.8	1820	1833	100	0.96	Good	Human, Homo sapiens	2008-08-26	2014-12-08 22:10:28	2015-03-16 03:17:09	1830	1763	kingdom	1	0.96	0	0	0	0.95	0.92	Not_Removed	Not_Removed	Not_Removed	Not_Removed
779	411481.5	Bifidobacterium	adolescentis	NA	411481	L2-32	40	NA	PRJNA18197	SAMN00627056	GCA_000154085.1	AAXD00000000	Infant feces	WGS	Roche 454	2389110	59.3	2031	2428	100	0.968	Good	Human, Homo sapiens	2007-03-08	2014-12-08 22:10:27	2015-03-16 03:17:09	2037	1929	order	0.97	0.92	1	0.03	0.07	0.92	0.84	Removed	Not_Removed	Not_Removed	Removed
780	41200.45	Bifidobacterium	sp.	NA	41200	S07C.meta.bin_2	19	31384000	PRJNA492716	SAMN10316635	GCA_008661975.1	RPZR00000000	Feces	WGS	Illumina	2117188	59.6509	1797	NA	NA	0.968	Good	Human, Homo sapiens	2019-09-23	2019-10-02 13:44:00	2019-10-02 13:44:00	1740	1681	kingdom	1	0.97	0	0	0	0.94	0.91	Not_Removed	Not_Removed	Not_Removed	Not_Removed	B. adolescentis
781	41200.46	Bifidobacterium	sp.	NA	41200	S07B.meta.bin_2	17	31384000	PRJNA492716	SAMN10316627	GCA_008662155.1	RPZJ00000000	Feces	WGS	Illumina	2053440	59.6156	1749	NA	NA	0.968	Good	Human, Homo sapiens	2019-09-23	2019-10-02 13:47:20	2019-10-02 13:47:20	1694	1631	kingdom	1	0.96	0	0	0	0.94	0.91	Not_Removed	Not_Removed	Not_Removed	Not_Removed	B. adolescentis
782	41200.47	Bifidobacterium	sp.	NA	41200	S07A.meta.bin_2	22	31384000	PRJNA492716	SAMN10316618	GCA_008662305.1	RPZA00000000	Feces	WGS	Illumina	2070588	59.5611	1766	NA	NA	0.968	Good	Human, Homo sapiens	2019-09-23	2019-10-02 13:49:34	2019-10-02 13:49:34	1717	1652	kingdom	1	0.96	0	0	0	0.94	0.91	Not_Removed	Not_Removed	Not_Removed	Not_Removed	B. adolescentis
783	41200.48	Bifidobacterium	sp.	NA	41200	S06C.meta.bin_6	235	31384000	PRJNA492716	SAMN10316614	GCA_008662405.1	RPYW00000000	Feces	WGS	Illumina	2275812	60.0531	2178	NA	NA	0.92	Good	Human, Homo sapiens	2019-09-23	2019-10-02 13:50:39	2019-10-02 13:50:39	2105	1971	kingdom	1	0.94	0	0	0	0.92	0.86	Not_Removed	Not_Removed	Not_Removed	Not_Removed	B. adolescentis
784	41200.49	Bifidobacterium	sp.	NA	41200	S09C.meta.bin_4	197	31384000	PRJNA492716	SAMN10316693	GCA_008668545.1	RQBX00000000	Feces	WGS	Illumina	1564274	59.7282	1436	NA	NA	0.863	Good	Human, Homo sapiens	2019-09-23	2019-10-02 14:04:29	2019-10-02 14:04:29	1404	1368	kingdom	1	0.97	0	0	0	0.96	0.93	Not_Removed	Not_Removed	Not_Removed	Not_Removed	B. adolescentis
785	41200.50	Bifidobacterium	sp.	NA	41200	S09B.meta.bin_8	207	31384000	PRJNA492716	SAMN10316689	GCA_008668675.1	RQBT00000000	Feces	WGS	Illumina	1511559	59.7516	1427	NA	NA	0.823	Good	Human, Homo sapiens	2019-09-23	2019-10-02 14:06:55	2019-10-02 14:06:55	1388	1354	kingdom	1	0.98	0	0	0	0.96	0.93	Not_Removed	Not_Removed	Not_Removed	Not_Removed	B. adolescentis
786	41200.51	Bifidobacterium	sp.	NA	41200	S09A.meta.bin_8	214	31384000	PRJNA492716	SAMN10316681	GCA_008668835.1	RQBL00000000	Feces	WGS	Illumina	1581039	59.5673	1497	NA	NA	0.879	Good	Human, Homo sapiens	2019-09-23	2019-10-02 14:08:53	2019-10-02 14:08:53	1460	1426	class	0.99	0.96	0.87	0.02	0.05	0.95	0.92	Removed	Not_Removed	Not_Removed	Removed	B. adolescentis
787	41200.52	Bifidobacterium	sp.	NA	41200	S08A.meta.bin_11	25	31384000	PRJNA492716	SAMN10316644	GCA_008669245.1	RQAA00000000	Feces	WGS	Illumina	2007600	59.6177	1707	NA	NA	0.96	Good	Human, Homo sapiens	2019-09-23	2019-10-02 14:13:34	2019-10-02 14:13:34	1645	1602	kingdom	1	0.97	0	0	0	0.95	0.92	Not_Removed	Not_Removed	Not_Removed	Not_Removed	B. adolescentis
788	41200.53	Bifidobacterium	sp.	NA	41200	S08C.meta.bin_10	41	31384000	PRJNA492716	SAMN10316664	GCA_008671015.1	RQAU00000000	Feces	WGS	Illumina	2124110	59.4769	1821	NA	NA	0.96	Good	Human, Homo sapiens	2019-09-23	2019-10-02 14:15:47	2019-10-02 14:15:47	1746	1698	kingdom	1	0.97	0	0	0	0.94	0.92	Not_Removed	Not_Removed	Not_Removed	Not_Removed	B. adolescentis
789	41200.54	Bifidobacterium	sp.	NA	41200	S08B.meta.bin_10	28	31384000	PRJNA492716	SAMN10316654	GCA_008671155.1	RQAK00000000	Feces	WGS	Illumina	1872894	59.4931	1589	NA	NA	0.887	Good	Human, Homo sapiens	2019-09-23	2019-10-02 14:17:53	2019-10-02 14:17:53	1528	1482	kingdom	1	0.97	0	0	0	0.94	0.91	Not_Removed	Not_Removed	Not_Removed	Not_Removed	B. adolescentis
790	41200.55	Bifidobacterium	sp.	NA	41200	S06B.meta.bin_7	221	31384000	PRJNA492716	SAMN10316605	GCA_008671335.1	RPYN00000000	Feces	WGS	Illumina	1998800	59.8034	1813	NA	NA	0.936	Good	Human, Homo sapiens	2019-09-23	2019-10-02 14:20:23	2019-10-02 14:20:23	1762	1712	class	0.99	0.96	0.97	0.02	0.04	0.95	0.92	Removed	Not_Removed	Not_Removed	Removed	B. adolescentis
791	41200.56	Bifidobacterium	sp.	NA	41200	S06A.meta.bin_7	206	31384000	PRJNA492716	SAMN10316596	GCA_008671475.1	RPYE00000000	Feces	WGS	Illumina	1898446	59.8161	1740	NA	NA	0.912	Good	Human, Homo sapiens	2019-09-23	2019-10-02 14:21:27	2019-10-02 14:21:27	1681	1630	class	0.99	0.96	0.93	0.02	0.04	0.96	0.92	Removed	Not_Removed	Not_Removed	Removed	B. adolescentis
792	41200.57	Bifidobacterium	sp.	NA	41200	S05B.meta.bin_14	224	31384000	PRJNA492716	SAMN10316572	GCA_008671995.1	RPXG00000000	Feces	WGS	Illumina	1571569	59.936	1530	NA	NA	0.54	Good	Human, Homo sapiens	2019-09-23	2019-10-02 14:27:34	2019-10-02 14:27:34	1470	1428	kingdom	1	0.97	0	0	0	0.95	0.92	Not_Removed	Not_Removed	Not_Removed	Not_Removed	B. adolescentis
793	41200.58	Bifidobacterium	sp.	NA	41200	S02C.meta.bin_7	33	31384000	PRJNA492716	SAMN10316503		RPUP00000000	Feces	WGS	Illumina	2080403	59.1728	1777	NA	NA	0.944	Good	Human, Homo sapiens	2019-09-23	2019-10-02 14:45:53	2019-10-02 14:45:53	1704	1658	kingdom	1	0.97	0	0	0	0.94	0.91	Not_Removed	Not_Removed	Not_Removed	Not_Removed	B. adolescentis
794	41200.59	Bifidobacterium	sp.	NA	41200	S02B.meta.bin_11	26	31384000	PRJNA492716	SAMN10316486	GCA_008673685.1	RPTY00000000	Feces	WGS	Illumina	1710396	59.7592	1442	NA	NA	0.758	Good	Human, Homo sapiens	2019-09-23	2019-10-02 14:49:25	2019-10-02 14:49:25	1381	1350	kingdom	1	0.98	0	0	0	0.95	0.93	Not_Removed	Not_Removed	Not_Removed	Not_Removed	B. adolescentis
795	469594.3	Bifidobacterium	sp.	NA	216816	12_1_47BFAA	61	NA	PRJNA41959	SAMN02463822	GCA_000185665.1	ADCN00000000	NA	WGS	Roche 454	2405990	59.99	2054	2043	100	0.944	Good	Human, Homo sapiens	2011-01-04	2014-12-08 22:10:29	2015-03-16 03:17:09	2088	2030	kingdom	1	0.97	0	0	0	0.94	0.91	Not_Removed	Not_Removed	Not_Removed	Not_Removed	B. longum subsp. longum
796	473819.7	Bifidobacterium	dentium	NA	473819	ATCC 27678	2	NA	PRJNA20555	SAMN00000021	GCA_000172135.1	ABIX00000000	Feces	WGS	Roche 454	2642081	58.5	2153	2430	100	0.96	Good	Human, Homo sapiens	2008-01-02	2014-12-08 22:10:28	2015-03-16 03:17:09	2157	2104	kingdom	1	0.98	0	0	0	0.98	0.96	Not_Removed	Not_Removed	Not_Removed	Not_Removed
797	484020.3	Bifidobacterium	bifidum	NA	484020	BGN4	1	NA	PRJNA21077	SAMN02603486	GCA_000265095.1	CP001361.1	Feces	Complete	Unknown	2223664	62.6	1828	1835	99.7	0.96	Good	Human, Homo sapiens	2012-06-05	2014-12-08 22:10:27	2015-03-16 03:17:09	1819	1749	kingdom	1	0.96	0	0	0	0.97	0.93	Not_Removed	Not_Removed	Not_Removed	Not_Removed
798	500634.3	Bifidobacterium	bifidum	NA	500634	ATCC 29521	54	NA	PRJNA28655	SAMN02436821	GCA_000466525.1	AWSW00000000	Intestine	WGS	Illumina	2198551	62.7	1894	2109	100	0.944	Good	Human, Homo sapiens	2013-09-12	2014-12-08 22:10:27	2015-03-16 03:17:09	1871	1808	kingdom	1	0.97	0	0	0	0.95	0.92	Not_Removed	Not_Removed	Not_Removed	Not_Removed
799	518634.7	Bifidobacterium	breve	NA	518634	DSM 20213	117	NA	PRJNA29259	SAMN00008778	GCA_000158015.1	ACCG00000000	Intestine	WGS	Roche 454	2329986	58.47	1972	2263	100	0.952	Good	Human, Homo sapiens	2009-01-22	2014-12-08 22:10:28	2015-03-16 03:17:09	2091	1926	kingdom	1	0.92	0	0	0	0.94	0.86	Not_Removed	Not_Removed	Not_Removed	Not_Removed
800	518635.7	Bifidobacterium	angulatum	NA	518635	DSM 20098	17	NA	PRJNA29261	SAMN00008777	GCA_000156635.1	ABYS00000000	NA	WGS	Roche 454	2007108	59.4	1621	1748	100	0.952	Good	Human, Homo sapiens	2008-10-30	2014-12-08 22:10:27	2015-03-16 03:17:09	1594	1563	kingdom	1	0.98	0	0	0	0.96	0.94	Not_Removed	Not_Removed	Not_Removed	Not_Removed
801	537937.5	Bifidobacterium	longum	subsp. infantis	537937	CCUG 52486	22	NA	PRJNA30065	SAMN02463677	GCA_000155415.1	ABQQ00000000	Elderly feces	WGS	Roche 454	2480850	60.2	2085	2240	100	0.944	Good	Human, Homo sapiens	2008-08-26	2014-12-08 22:10:28	2015-03-16 03:17:09	2131	2010	kingdom	1	0.94	0	0	0	0.91	0.86	Not_Removed	Not_Removed	Not_Removed	Not_Removed
802	547043.16	Bifidobacterium	pseudocatenulatum	NA	547043	LMG 10505	10	25085493	PRJNA239855	SAMN02673443	GCA_000741685.1	JGZF00000000	Infant feces	WGS	Ion Torrent	2283768	56.4	1911	1771	100	0.96	Good	Human, Homo sapiens	2014-08-18	2014-12-08 23:17:30	2015-03-16 03:17:09	1823	1797	kingdom	1	0.99	0	0	0	0.96	0.95	Not_Removed	Not_Removed	Not_Removed	Not_Removed
803	547043.6	Bifidobacterium	pseudocatenulatum	NA	547043	DSM 20438	36	NA	PRJNA30373	SAMN00008796	GCA_000173435.1	ABXX00000000	NA	WGS	Roche 454	2304808	56.3	1890	2151	100	0.96	Good	Human, Homo sapiens	2008-10-23	2014-12-08 22:10:28	2015-03-16 03:17:09	1884	1843	kingdom	1	0.98	0	0	0	0.96	0.94	Not_Removed	Not_Removed	Not_Removed	Not_Removed
804	548480.3	Bifidobacterium	longum	subsp. longum	548480	ATCC 55813	114	NA	PRJNA31437	SAMN00001475	GCA_000003135.1	ACHI00000000	NA	WGS	Roche 454|Illumina|Sanger	2396359	60.3	1920	2109	100	0.944	Good	Human, Homo sapiens	2009-03-10	2014-12-08 22:10:28	2015-03-16 03:17:09	2057	1970	phylum	1	0.96	0.67	0.05	0.11	0.93	0.89	Removed	Not_Removed	Not_Removed	Removed
805	553191.3	Bifidobacterium	dentium	NA	553191	JCVIHMP022	35	NA	PRJNA31395	SAMN00115044	GCA_000149165.2	AEHJ00000000	NA	WGS	Roche 454|Illumina	2636584	58.44	2302	2278	99.7	0.919	Good	Human, Homo sapiens	2010-10-08	2014-12-08 22:10:28	2015-03-16 03:17:09	2292	2158	kingdom	1	0.94	0	0	0	0.94	0.89	Not_Removed	Not_Removed	Not_Removed	Not_Removed
806	561180.13	Bifidobacterium	gallicum	NA	561180	LMG 11596	12	25085493	PRJNA239846	SAMN02673434	GCA_000741205.1	JGYW00000000	Intestine	WGS	Ion Torrent	2004594	57.6	1590	1507	99.7	0.952	Good	Human, Homo sapiens	2014-08-18	2014-12-08 23:17:39	2015-03-16 03:17:09	1551	1504	kingdom	1	0.97	0	0	0	0.98	0.95	Not_Removed	Removed	Not_Removed	Removed
807	561180.4	Bifidobacterium	gallicum	NA	561180	DSM 20093	27	NA	PRJNA30751	SAMN02299421	GCA_000173375.1	ABXB00000000	Intestine	WGS	Roche 454	2019802	57.5	1569	1576	99.7	0.952	Good	Human, Homo sapiens	2008-10-01	2014-12-08 22:10:28	2015-03-16 03:17:09	1558	1512	kingdom	1	0.97	0	0	0	0.98	0.95	Not_Removed	Removed	Not_Removed	Removed
808	565040.3	Bifidobacterium	longum	subsp. infantis	565040	157F-NC	3	NA	PRJNA32051		GCA_000196575.1	AP010890,AP010891,AP010892	NA	Complete	Sanger	2408831	60.08	2058	1999	100	0.944	Good	Human, Homo sapiens	2011-01-28	2014-12-08 22:10:28	2015-03-16 03:17:09	2019	1925	kingdom	1	0.95	0	0	0	0.93	0.88	Not_Removed	Not_Removed	Not_Removed	Not_Removed
809	565042.3	Bifidobacterium	longum	subsp. longum	565042	JCM 1217	1	21270894	PRJNA32047		GCA_000196555.1	AP010888	NA	Complete	Sanger	2385164	60.33	1998	1924	100	0.944	Good	Human, Homo sapiens	2011-01-28	2014-12-08 22:10:28	2015-03-16 03:17:09	1967	1829	kingdom	1	0.93	0	0	0	0.92	0.86	Not_Removed	Not_Removed	Not_Removed	Not_Removed
810	566552.16	Bifidobacterium	catenulatum	NA	566552	LMG 11043	11	25085493	PRJNA239843	SAMN02673431	GCA_000741565.1	JGYT00000000	Intestine	WGS	Ion Torrent	2082756	56.1	1817	1664	100	0.919	Good	Human, Homo sapiens	2014-08-18	2014-12-08 23:17:40	2015-03-16 03:17:09	1730	1674	kingdom	1	0.97	0	0	0	0.93	0.9	Not_Removed	Not_Removed	Not_Removed	Not_Removed
811	566552.4	Bifidobacterium	catenulatum	NA	566552	DSM 16992	31	NA	PRJNA30749	SAMN00008795	GCA_000173455.1	ABXY00000000	NA	WGS	Roche 454	2058429	56.1	1745	1950	100	0.96	Good	Human, Homo sapiens	2008-10-23	2014-12-08 22:10:28	2015-03-16 03:17:09	1715	1666	kingdom	1	0.97	0	0	0	0.93	0.9	Not_Removed	Not_Removed	Not_Removed	Not_Removed
812	573236.3	Bifidobacterium	animalis	subsp. lactis	573236	V9	1	20511504	PRJNA32515	SAMN02603934	GCA_000092765.1	CP001892	Infant feces	Complete	Unknown	1944050	60.49	1613	1572	100	0.96	Good	Human, Homo sapiens	2010-05-05	2014-12-08 22:10:27	2015-03-16 03:17:09	1580	1544	kingdom	1	0.98	0	0	0	0.98	0.96	Not_Removed	Not_Removed	Not_Removed	Not_Removed
813	592977.3	Bifidobacterium	stercoris	NA	1680	DSM 24849	15	25085493	PRJNA239866	SAMN02673454	GCA_000741415.1	JGZQ00000000	Adult feces	WGS	Ion Torrent	2304613	59.4	1967	1890	100	0.968	Good	Human, Homo sapiens	2014-08-18	2014-12-08 23:17:59	2015-03-16 03:17:09	1932	1830	kingdom	1	0.95	0	0	0	0.92	0.87	Not_Removed	Not_Removed	Not_Removed	Not_Removed
814	630129.12	Bifidobacterium	catenulatum	subsp. kashiwanohense	630129	APCKJ1	1	31659215	PRJNA433514	SAMN08498918	GCA_009684555.1	CP026729	Infant feces	Complete	PacBio	2445409	56.1903	2215	2085	NA	0.96	Good	Human, Homo sapiens	2019-11-20	2019-12-31 02:33:00	2019-12-31 02:33:00	2086	1990	kingdom	1	0.95	0	0	0	0.9	0.86	Not_Removed	Not_Removed	Not_Removed	Not_Removed
815	702459.3	Bifidobacterium	bifidum	NA	702459	PRL2010	1	20974960	PRJNA42863	SAMN02603510	GCA_000165905.1	CP001840	Infant feces	Complete	Unknown	2214656	62.67	1904	1706	100	0.96	Good	Human, Homo sapiens	2010-11-02	2014-12-08 22:10:28	2015-03-16 03:17:09	1851	1767	kingdom	1	0.95	0	0	0	0.95	0.9	Not_Removed	Not_Removed	Not_Removed	Not_Removed
816	722911.3	Bifidobacterium	longum	subsp. longum	722911	F8	1	NA	PRJNA45963	SAMEA3138379	GCA_000210755.1	FP929034	NA	Complete	Roche 454	2384987	59.62	1997	1682	100	0.944	Good	Human, Homo sapiens	2010-03-25	2014-12-08 22:10:28	2015-03-16 03:17:09	1972	1915	kingdom	1	0.97	0	0	0	0.94	0.91	Not_Removed	Not_Removed	Not_Removed	Not_Removed
817	742729.3	Bifidobacterium	animalis	subsp. lactis	742729	Bi-07	1	NA	PRJNA156975	SAMN02603215	GCA_000277345.1	CP003498.1	NA	Complete	Unknown	1938822	60.5	1601	1597	100	0.96	Good	Human, Homo sapiens	2012-05-07	2014-12-08 22:10:27	2015-03-16 03:17:09	1577	1541	kingdom	1	0.98	0	0	0	0.98	0.96	Not_Removed	Not_Removed	Not_Removed	Not_Removed
818	866777.3	Bifidobacterium	breve	NA	866777	ACS-071-V-Sch8b	1	NA	PRJNA51077	SAMN00100758	GCA_000213865.1	CP002743	NA	Complete	Roche 454	2327492	58.73	1972	1826	99.7	0.952	Good	Human, Homo sapiens	2011-05-17	2014-12-08 22:10:28	2015-03-16 03:17:09	1955	1904	kingdom	1	0.97	0	0	0	0.94	0.91	Not_Removed	Not_Removed	Not_Removed	Not_Removed
819	871562.3	Bifidobacterium	dentium	NA	871562	ATCC 27679	10	NA	PRJNA51373	SAMN00210789	GCA_000146775.1	AEEQ00000000	NA	WGS	Roche 454	2645781	58.19	2233	2336	100	0.96	Good	Human, Homo sapiens	2010-08-25	2014-12-08 22:10:28	2015-03-16 03:17:09	2231	2105	kingdom	1	0.94	0	0	0	0.94	0.89	Not_Removed	Not_Removed	Not_Removed	Not_Removed
820	890402.3	Bifidobacterium	longum	subsp. longum	890402	BBMN68	1	21097614	PRJNA53143	SAMN02603469	GCA_000166315.1	CP002286	Intestine	Complete	Unknown	2265943	59.95	1882	1806	100	0.944	Good	Human, Homo sapiens	2010-11-10	2014-12-08 22:10:28	2015-03-16 03:17:09	1847	1809	kingdom	1	0.98	0	0	0	0.93	0.92	Not_Removed	Not_Removed	Not_Removed	Not_Removed
821	911598.3	Bifidobacterium	animalis	subsp. lactis	911598	BS 01	7	NA	PRJNA59607	SAMN00764905	GCA_000240765.1	AHGW00000000	Feces	WGS	Unknown	1932387	60.5	1615	1572	100	0.96	Good	Human, Homo sapiens	2011-12-30	2014-12-08 22:10:27	2015-03-16 03:17:09	1582	1543	kingdom	1	0.98	0	0	0	0.98	0.96	Not_Removed	Not_Removed	Not_Removed	Not_Removed
822	936351.3	Bifidobacterium	breve	NA	936351	S27	1	NA	PRJNA214956	SAMN03081483	GCA_000569075.1	CP006716.1	Infant feces	Complete	Roche 454	2294458	58.7	1948	1748	100	0.952	Good	Human, Homo sapiens	2014-02-14	2014-12-08 22:10:28	2015-03-16 03:17:09	1915	1871	kingdom	1	0.98	0	0	0	0.94	0.92	Not_Removed	Not_Removed	Not_Removed	Not_Removed
