# Supplementary material
Source: Research Square preprint supplement (doi:10.21203/rs.3.rs-9539203/v1)

**A**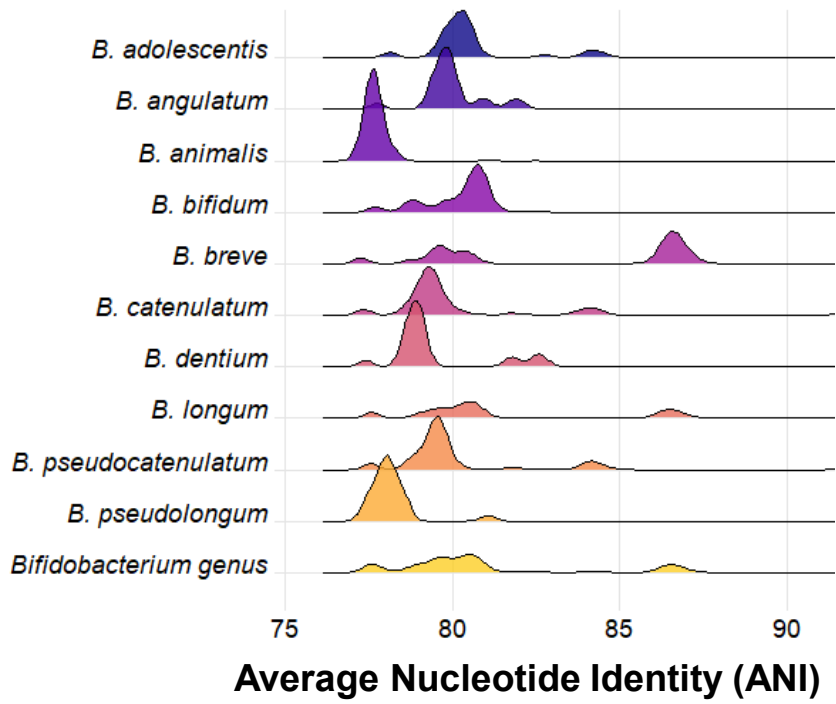**B**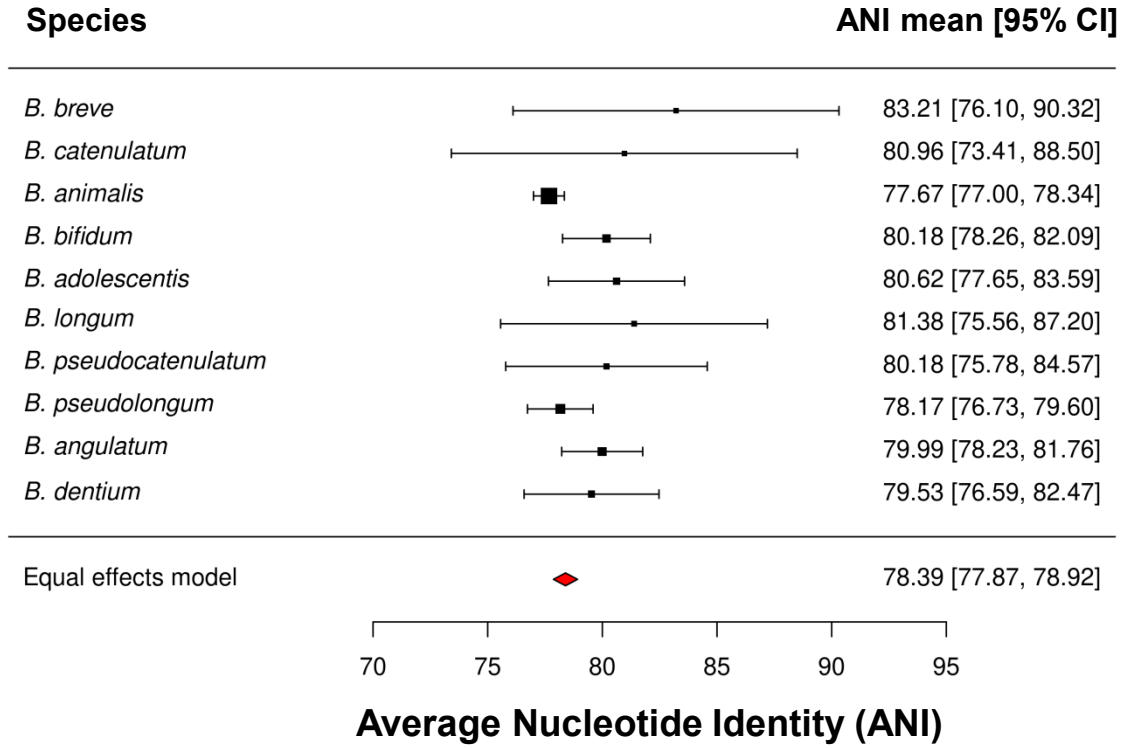**C**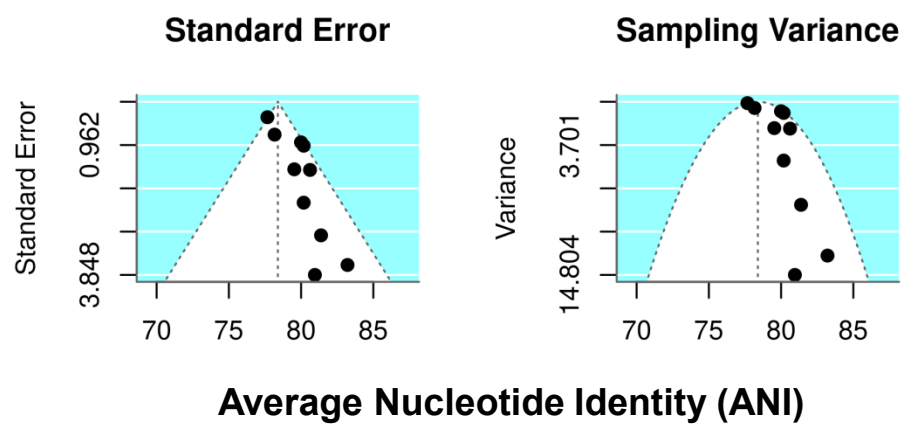

Supplement: Supplementary file 1 [file 14fa799b71ebcafcd2ff344e.pdf]
